# Supplementary material
Source: PubMed Central journal article supplement (PMC7250405)
Supplement: NIHMS1584643-supplement-ACS_Catal_2020_10_4337_SI_1.pdf [file NIHMS1584643-supplement-ACS_Catal_2020_10_4337_SI_1.pdf]

## Supporting Information Part A

### Mechanism of Cobalt-Catalyzed Heterodimerization of Acrylates and 1,3-Dienes. A Potential Role of Cationic Cobalt(I) Intermediates

Montgomery Gray,<sup>†</sup> Michael T. Hines,<sup>§</sup> Mahesh M. Parsutkar,<sup>†</sup> A. J. Wahlstrom,<sup>§</sup> Nicholas A. Brunelli<sup>§,\*</sup> and T.V. RajanBabu<sup>†,\*</sup>

The Ohio State University, William G. Lowrie Department of Chemical and Biomolecular Engineering, 151 W. Woodruff, Columbus, OH 43210 and the Department of Chemistry and Biochemistry, 100 W. 18<sup>th</sup> Avenue, Columbus, Ohio 43210, United States

\*Corresponding Authors: [brunelli.2@osu.edu](mailto:brunelli.2@osu.edu); Twitter: OSUChemEProfBru; rajanbabu.1@osu.edu  
<sup>†</sup> Department of Chemistry and Biochemistry. <sup>§</sup> Department of Chemical and Biomolecular Engineering

#### Table of Contents

|                                                                       |    |
|-----------------------------------------------------------------------|----|
| 1.1 General Methods.....                                              | S3 |
| 2.1 Chemicals.....                                                    | S3 |
| 2.2 Purification Methods.....                                         | S3 |
| 2.2.1 Purification of solvents and storage of purified chemicals..... | S3 |
| 2.2.2 Distillation of methyl acrylate.....                            | S3 |
| 2.2.3 Distillation of 2,3-dimethyl-1,3-butadiene.....                 | S4 |
| 3.1 Synthesis of reagents.....                                        | S4 |
| 3.1.1 Activation of Zn.....                                           | S4 |
| 3.1.2 Synthesis of (dppp)CoBr <sub>2</sub> .....                      | S4 |
| 3.1.3 Synthesis of cationic cobalt complex.....                       | S5 |
| 4.1 General procedure for in situ experiment.....                     | S5 |
| 4.1.1 React IR set up.....                                            | S5 |
| 4.1.2 Catalyst preparation.....                                       | S5 |
| 4.1.3 Reaction set-up and analysis.....                               | S6 |
| 4.1.4 IR Analysis.....                                                | S7 |
| 5.1 Specifics for IR experiments.....                                 | S7 |
| 5.1.1 Same Excess.....                                                | S7 |
| 5.1.2 Different Excess.....                                           | S8 |
| 5.1.3 Stir Test.....                                                  | S8 |

|                                                                                                                                   |     |
|-----------------------------------------------------------------------------------------------------------------------------------|-----|
| 5.1.4 Catalyst Order Test.....                                                                                                    | S10 |
| 5.1.5 Diene Polymerization without catalyst Test.....                                                                             | S10 |
| 5.1.6 Diene Polymerization catalyst Test.....                                                                                     | S10 |
| 5.1.7 Product Inhibition.....                                                                                                     | S10 |
| 6.1 Isotopic Labeling Experiments.....                                                                                            | S11 |
| 6.1.1 Reversibility of $\beta$ -hydride elimination.....                                                                          | S11 |
| 7.1 Co(I) activity vs Co(I) <sup>+</sup> activity.....                                                                            | S11 |
| 8.1 UV-Vis studies.....                                                                                                           | S11 |
| 8.1.1 Background.....                                                                                                             | S11 |
| 8.1.2 (dppp) <sub>3</sub> Co(I) <sub>2</sub> Br <sub>2</sub> .....                                                                | S11 |
| 8.1.3 (dppp)Co(II)Br <sub>2</sub> .....                                                                                           | S12 |
| 8.1.4 (dppp)Co(I) <sup>+</sup> .....                                                                                              | S12 |
| 8.1.4 Diene Coordination.....                                                                                                     | S12 |
| 8.1.5 Acrylate Coordination.....                                                                                                  | S12 |
| 8.1.6 Diene vs Acrylate Competition Test.....                                                                                     | S12 |
| 8.1.7 Synthesis and UV-Vis Analysis of Cationic Cobalt(I) from (dppp) <sub>3</sub> Co <sub>2</sub> (I)Br <sub>2</sub> crystal.... | S12 |
| 8.1.8 Stir Time Analysis UV-Vis.....                                                                                              | S12 |
| 8.1.9 Preparation of the Catalyst for Product Investigation.....                                                                  | S13 |
| 8.1.10 Preparation of the Catalyst for Product+Diene Investigation.....                                                           | S13 |
| 8.1.11Preparation of the Catalyst for Dilution Investigation.....                                                                 | S13 |
| 9.1 Reaction Engineering.....                                                                                                     | S16 |
| 9.1.1 High Concentration Batch Reaction.....                                                                                      | S16 |
| 10.1 Stir Time Comparison.....                                                                                                    | S16 |
| 10.1.1 Stir Time Analysis of ZnBr <sub>2</sub> vs NaBARF.....                                                                     | S16 |
| 11.1 Spectral Analysis.....                                                                                                       | S17 |
| 11.1.1 Typical In-Situ IR Spectrums.....                                                                                          | S17 |
| 11.1.2 UV-Vis Spectra.....                                                                                                        | S18 |
| 11.1.3 <sup>1</sup> H and <sup>13</sup> C NMR of Pure product.....                                                                | S30 |
| 11.1.4 NMR Analysis of (dppp)Co(m)Br <sub>n</sub> Species.....                                                                    | S30 |
| 11.1.5 <sup>1</sup> H and <sup>13</sup> C NMR of Deuterated product.....                                                          | S30 |
| 12.1 <sup>1</sup> H and <sup>13</sup> C NMR and Chromatograms.....                                                                | S31 |

|                                           |     |
|-------------------------------------------|-----|
| 13.1 VTNA Experiments.....                | S55 |
| 14.1 Modeling.....                        | S56 |
| 14.1.1 Model No Free Cobalt Modeling..... | S56 |
| 14.1.1 Model Free Cobalt.....             | S59 |
| References.....                           | S64 |
| X-Ray Crystallography.....                | S65 |

## 1.1 General Methods

All use of moisture and oxygen sensitive materials were handled using standard Schlenk techniques under an argon atmosphere or in a glove-box under a nitrogen atmosphere maintained at less than 5 ppm oxygen. The Schlenk line was attached to a vacuum pump that was kept between 0.2 and 0.01 mm Hg for all evacuations and drying of air sensitive compounds. Before use, all glassware is washed by soaking it in a base bath (isopropanol and KOH) overnight (12 h), rinsing with water, then soaking in an acid bath overnight (12 h), then rinsed a second time with water and dried with acetone. The glassware was stored in an oven for 12 h that was set at 160 °C.

All gas chromatographic analysis of the reactions were performed on an Agilent 6850 G.C. with a HP-1 methyl siloxane column (30 m, 0.32 mm ID, 0.25  $\mu$ m) and hydrogen carrier gas with FID-detector at 250 °C. The method of analysis: initial temperature 50 °C held for 5 min, ramp 10 °C/min to 70 °C, held for 15 min ramp 20 °C/min to 250 °C held for 5 min.

Proton and carbon nuclear magnetic resonance spectra ( $^1\text{H}$  and  $^{13}\text{C}$ ) were recorded on a Bruker Avance III HD Ascend 400 MHz SPX equipped with an inverse probe and for deuterium labeling experiments a Bruker Avance III HD Ascend 600 MHz SPX was used. Solvent resonance was used as an internal standard for the chemical shifts,  $\text{CDCl}_3$  at 7.26 ppm for  $^1\text{H}$  NMR and  $\text{CDCl}_3$  at 77.16 ppm for  $^{13}\text{C}$  NMR. NMR data are reported as the following: Chemical shift, multiplicity (s = singlet, d = doublet, t = triplet, q = quartet, pent = pentet, m = multiplet, dd = doublet of doublet, dt = doublet of triplet), coupling constants (Hz), and integration.

All UV-Vis spectra were collected on an Agilent Cary 60 spectrophotometer outfitted with stirring capabilities at room temperature (22 °C). All IR spectra were collected on a Mettler Toledo ReactIR 45m instrument.

## 2.1 Chemicals

The chemicals used for the experiments were as follows: Diethyl ether (Fischer Scientific, Anhydrous), tetrahydrofuran (Alfa Aesar, 99%), hexanes (Sigma Aldrich,  $\geq 98.5\%$ ), pentanes (Sigma Aldrich,  $\geq 99\%$ ), 1,2-dichloroethane (Sigma Aldrich,  $\geq 99\%$ ), dichloromethane (Sigma Aldrich,  $\geq 99.8\%$ , 40-150 ppm amylene), methyl acrylate (Sigma Aldrich, 99%,  $\leq 100$  ppm monomethyl ether hydroquinone), 2,3-dimethyl-1,3-butadiene (Alfa Aesar, 98%, 100 ppm BHT), Zinc (Sigma Aldrich),  $\text{CoBr}_2$  (Sigma Aldrich, 99%),  $\text{ZnBr}_2$  (Sigma Aldrich, 98%, Anhydrous), and 1,3-Bis(diphenylphosphino)propane (Sigma Aldrich, 97%).

## 2.2 Purification methods

### 2.2.1 Purification of solvents and storage of purified chemicals

Diethyl ether, tetrahydrofuran, hexanes, and pentanes were freshly distilled prior to each reaction. They were distilled over Na metal and allowed to cool to room temperature before use. 1,2-Dichloroethane and dichloromethane were freshly distilled prior to each reaction. The solvents were distilled over  $\text{CaH}_2$  and allowed to cool to room temperature before their use in reactions.

### 2.2.2 Distillation of methyl acrylate<sup>1</sup>

Methyl acrylate, (50.00 mL, 47.80 g, 0.555 moles), was added to a 100 mL beaker. The methyl acrylate was washed with 2 M NaOH (20 mL portions, 3 times) and then washed with distilled water (20

mL portions, 3 times) in order to get wash the methyl acrylate clean of the inhibitor monomethyl ether hydroquinone. The washed methyl acrylate is added to a 100 mL round bottom flask equipped with a magnetic stirrer and  $\text{CaCl}_2$  (0.50 g, 0.0045 moles). A short-path distillation apparatus is attached to the round bottom flask, and the apparatus is added to an oil bath at 60 °C. The fractional distillation is then carried out under reduced pressure (via a Schlenk line 0.2 to 0.01 mmHg). After distillation, the acrylate is partitioned into two 20 mL oven dried glass vials. The vials are then wrapped in black electrical tape and stored in a freezer, while not in use, set to -4 °C. Before use, the methyl acrylate is taken out and allowed to warm to room temperature (23 °C) in the dark. After use, the methyl acrylate is purged with dry nitrogen and stored again in the dark at -4 °C.

### 2.2.3 Distillation of 2,3-dimethyl-1,3-butadiene<sup>1</sup>

2,3-Dimethyl-1,3-butadiene (Alfa Aesar, 98%, 25.00 mL, 18.15 g, 0.221 moles) was added to a 50 mL round bottom flask equipped with a magnetic stir bar and  $\text{NaBH}_4$  (1.00 g, 0.026 moles). A short path distillation apparatus is attached to the round bottom flask and the flask is placed in an oil bath set to 50 °C. The fractional distillation is carried out under reduced pressure (via a Schlenk line 0.2 to 0.01 mmHg). After distillation, the diene is split into 2 portions and stored in two 20 mL oven dried glass vials at -4 °C when not in use. Before use, the 2,3-dimethyl-1,3-butadiene is allowed to warm to room temperature (23 °C). After use, the 2,3-dimethyl-1,3-butadiene is purged with dried nitrogen and stored in a freezer at -4 °C.

## 3.1 Synthesis of reagents

### 3.1.1 Activation of Zn<sup>2</sup>

Zn (15.00 grams, 0.229 moles) was placed in a 250 mL beaker charged with a magnetic stir bar. HCl (2.00 M, 25 mL) was added to the beaker and the mixture was allowed to stir for 25 min. The stirring was stopped, and the liquid was decanted out of the beaker. The contents of the beaker was then washed with distilled water (20 mL portions, 3 times). Following the addition of each portion of distilled water, the mixture was stirred for 5 min, and the water is decanted off. The solution was then washed with acetone (20 mL portions, 3 times), and the acetone is decanted off. The Zn is then placed in a 50 mL round bottom flask stoppered with a flow control valve. The Zn is then dried under vacuum (via a Schlenk line 0.2 to 0.01 mmHg) while in an oil bath at 100 °C. The flask was then filled with argon and brought into a glove-box. The zinc was then ground into a fine powder using a ceramic mortar and pestle. The resulting activated Zn powder is stored in a 20 mL oven dried glass vial in the glove-box.

### 3.1.2 Synthesis of (dppp) $\text{CoBr}_2$ <sup>2</sup>

In a glove-box, anhydrous  $\text{Co(II)Br}_2$  (3.46 grams, 0.0159 moles, 1.00 eq) is added to a 250 mL round bottom flask equipped with a magnetic stir bar. In a separate 250 mL round bottom flask is taken 1,3-bis(diphenylphosphino)propane (dppp) (6.86 grams, 0.0166 moles, 1.04 eq) with a magnetic stir bar. To the flask containing the  $\text{Co(II)Br}_2$ , freshly distilled THF (100 mL) is added, and the mixture is allowed to stir until all the  $\text{Co(II)Br}$  is dissolved. To the flask containing the dppp, a minimal amount of distilled THF (20 mL) is added, and the mixture is stirred until the majority of the dppp has dissolved. The stirring is stopped for the dppp flask and the undissolved dppp is allowed to settle to the bottom of the flask. The dissolved dppp solution is slowly added to the stirring  $\text{Co(II)Br}_2$  solution, the undissolved dppp is dissolved in THF (5 mL), and the remainder of the solution is slowly added to the  $\text{Co(II)Br}_2$

solution. The dppp and  $\text{Co(II)Br}_2$  solution is allowed to stir in the glove-box for 12 hr. The stirring is then stopped, and freshly distilled hexanes/diethyl ether solution (1:1 by volume, 100 mL) was added to the solution. Immediate precipitation of the  $(\text{dppp})\text{Co(II)Br}_2$  complex was observed and the solution is allowed to stir for 5 min. The supernatant is then decanted to obtain a green mixture. The solution is allowed to sit undisturbed for 5 min. The mixture is then washed with diethyl ether (50 mL portions, 3 times), and the supernatant is decanted. The solid is then taken out of the box and put on a Schlenk line where it is dried via vacuum (0.2 to 0.01 mmHg) for 12 h. A green solid is obtained. The solid is then brought into the glove-box and made into a fine powder and is further dried via vacuum for an additional 12 hr. The yield of  $(\text{dppp})\text{Co(II)Br}_2$  is 5.6 grams, 0.00887 moles, 56%. The  $(\text{dppp})\text{Co(II)Br}_2$  is stored in the glove-box.

### 3.1.3 Synthesis of cationic cobalt complex

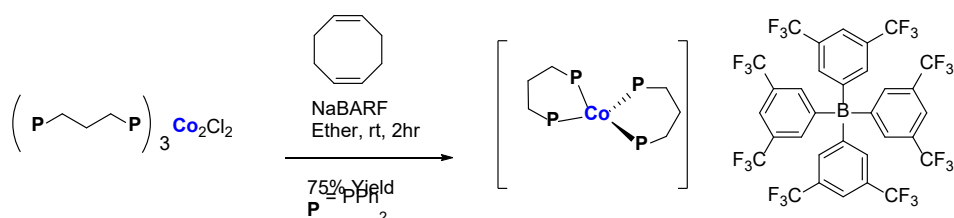

**Scheme S1.** Procedure for synthesizing the crystalline  $\text{Co(I)}^+ \text{BARF}^-$  complex.

In the dry-box, an 8-mL vial was charged with a magnetic stir bar, recrystallized  $\text{dppp}_3\text{Co}_2\text{Cl}_2$  (50 mg, 0.035 mmol, 1 equiv.) and NaBARF (62.2 mg, 0.07 mmol, 2 equiv.).<sup>3</sup> The vial was capped and a solution of cyclooctadiene (COD) (0.25 mL, 1.75 mmol, 50 equiv.) in ether (5 mL) was added via syringe. The resulting green mixture was stirred for 2 hr. Upon which the color changed from green to sea green. Stirring was stopped and solvent was evacuated under high vacuum ( $\sim 0.1$  mm Hg) for 2-3 h to afford crude solid. The crude solid thus obtained was then dissolved in minimum amount of ether and filtered inside the drybox. To the filtrate was then diffused hexanes (by slow evaporation of hexane into an ether solution placed in an atmosphere of hexane) to afford the sea green crystals (23 mg, 75% yield upon recrystallization). The sea green crystal was then characterized by X-ray Crystallography and the data deposited at the Cambridge Crystallographic Data Center (CCDC #1945796).

## 4.1 General procedure for in situ experiment

### 4.1.1 React IR set up

The ReactIR 45m (from Mettler Toledo) was filled with liquid  $\text{N}_2$  and allowed to cool down for 1 h before use. The probe was attached, and the instrument was tuned to obtain optimal S/N. The readings were set to take one every 30 sec for a total of 8 hr. The instrument had the following specifications: ReactIR 45m; SN: 23553; Detector: MCT; Apodization: HappGenzel; Probe: DiComp (Diamond); SN: 23563; Interface: AgX 9.5mm x 1.5m Fiber (Silver Halide); Sampling: 3000 to 650  $\text{cm}^{-1}$ ; Resolution: 4; Scan option: AutoSelect; Gain: 1x.

### 4.1.2 Catalyst preparation

Before use, the glassware (see below) was cooled in a desiccator to room temperature (23 °C), it was then pumped into the glove-box. To a modified Schlenk flask, **Figure S1**, a flow control switch and a magnetic stir bar were added. Using an analytical balance (dppp)CoBr<sub>2</sub> (the indicated amounts as seen in section 5.1), Zn dust (the indicated amounts as seen in section 5.1), and ZnBr<sub>2</sub> (the indicated amounts as seen in section 5.1) were weighed out and placed in the modified Schlenk flask. After the solid reagents had been added, the flask was then sealed via a septum and electrical tape. Once sealed, the flask is taken out of the glove-box and immediately attached to a Schlenk line.

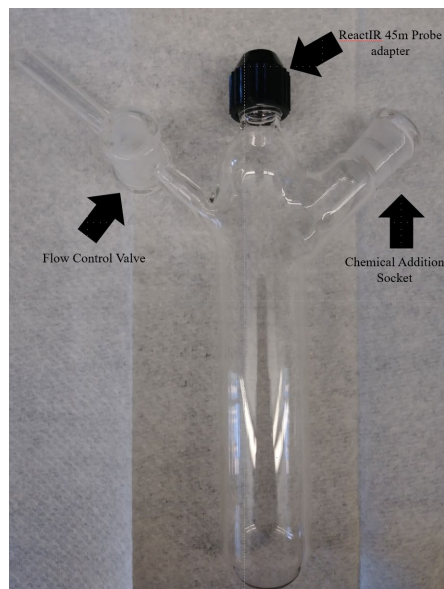

**Figure S1.** Modified Schlenk flask used for all procedures involving React IR.

#### 4.1.3 Reaction set-up and analysis

The Schlenk flask attached to a Schlenk line was placed in a water bath set to 30 °C with a stirring rate of 250 to 400 rpm. The Schlenk line was evacuated to 0.2 mmHg, and then filled with argon. This process was repeated two more times. After the line had been evacuated, the flask was open to the Schlenk line while under high argon flow. The flask itself was then evacuated to 0.2 mmHg and then filled with argon until it was at atmospheric pressure. This process was repeated 2 more times. After the third evacuation, the argon flow was turned on high, and the septa closing the top valve of the flask was removed and the ReactIR probe was placed into the neck and slid down until the tip of the probe is about 1 cm from the bottom of the flask. The probe was then sealed on and the flask was evacuated to 0.2 mmHg and then filled with argon. This process was repeated two more times for a total of three evacuations. A background scan (180 total scans) was performed while the probe was in the flask under argon. After the scan, DCE (2 mL) was added to the flask via a 3 mL syringe and a 6 inch needle. The solution was allowed to stir for 2 hr. A color change from blue/green to red/brown was observed after about 45 min of stirring. The solution was allowed to stir for 2 h under argon. A DCE (3 mL) solution of the indicated amounts as seen in section 5.1 of methyl acrylate, 2,3-dimethyl-1,3-butadiene, and dodecane (10 μL) was prepared by adding 3 mL of distilled DCE via a 10 mL syringe, 10 uL dodecane via a 10 μL syringe, methyl acrylate via a 100 μL syringe, and 2,3-dimethyl-1,3-butadiene via a 100 μL syringe. The vial was then wrapped in aluminum foil and stored at -4 °C and taken out 30 min prior to addition in order to allow it to warm to room temperature. After the solution of (dppp)CoBr<sub>2</sub>, Zn, and ZnBr<sub>2</sub> had been

stirring for 2 hr, 2 mL of the solution containing methyl acrylate and 2,3-dimethyl-1,3-butadiene was added to the solution via a 3 mL syringe and disposable needle. An immediate color change from red/brown to dark green was observed upon the addition of the solution. The solution was allowed to stir for an additional 2 h after the addition of the starting material solution. The remaining 1 mL of the 3 mL starting material solution was diluted using 1 mL adding 50:50 diethyl ether:hexane mixture. The resulting solution was used to obtain a GC spectra. After 2 hr, the reaction was stopped by using a 50:50 solution of diethyl ether:hexanes (4 mL) to the reaction vessel. The resulting solution was filtered through a short pad of silica gel using an additional 4 to 8 mL of the 50:50 diethyl ether:hexane mixture to rinse the reaction vessel. A small sample was then run on the GC to analyze the conversion of diene to product. This analysis is done by comparing the ratio of the diene peak area to that of the internal standard dodecane peak of the end reaction with the ratio of the starting material mixture, Equation S1.

$$\text{Percent Conversion of Diene} = 1 - \frac{\text{Diene}_{\text{Post Area}} / \text{Dodecane}_{\text{Post Area}}}{\text{Diene}_{\text{Pre Area}} / \text{Dodecane}_{\text{Pre Area}}} * 100$$

**Equation S1.** Equation used to calculate conversion of diene via G.C. analysis.

#### 4.1.4 IR Analysis

A ReactIR probe was used to collect in-situ data on the reaction progress and provided an infrared spectrum every 30 sec and records the wavenumbers from 3000  $\text{cm}^{-1}$  to 650  $\text{cm}^{-1}$ . The peaks that are monitored for this reaction are as follows: for the methyl acrylate, 1401  $\text{cm}^{-1}$ , for the 2,3-dimethyl-1,3-butadiene, 896  $\text{cm}^{-1}$ , and for the product, 896  $\text{cm}^{-1}$ .<sup>4,5,6</sup> The resulting data was then converted to an excel file and a MATLAB script was run that was able to fit the experimental data to a curve, using the provided curve fitting functions. After which the data was deconvoluted to put it into its final form for analysis.

### 5.1 Specifics for IR experiments:

#### 5.1.1 Same Excess

The general procedure is followed for these experiments with the following modifications

**Table S1.** Data for Same Excess Experiments

| Excess Experiment | Diene (mg) | Diene (M) | Acrylate (mg) | Acrylate (M) | (dppp)CoBr <sub>2</sub> (mg) | (dppp)CoBr <sub>2</sub> (mmol) | Zn (mg) | Zn (mmol) | ZnBr <sub>2</sub> (mg) | ZnBr <sub>2</sub> (mmol) | Diene Conversion (%) <sup>a</sup> |
|-------------------|------------|-----------|---------------|--------------|------------------------------|--------------------------------|---------|-----------|------------------------|--------------------------|-----------------------------------|
| Same Excess #1    | 32.9       | 0.100     | 89.5          | 0.26         | 96.1                         | 0.152                          | 99.5    | 1.52      | 356.0                  | 1.58                     | 90                                |
| Same Excess #2    | 40.1       | 0.122     | 95.4          | 0.28         | 95.8                         | 0.152                          | 100.0   | 1.53      | 355.4                  | 1.58                     | 91                                |
| Same Excess #3    | 49.6       | 0.151     | 106.4         | 0.31         | 95.6                         | 0.152                          | 99.6    | 1.52      | 354.4                  | 1.57                     | 98                                |
| Same Excess #4    | 66.0       | 0.201     | 124.3         | 0.36         | 95.9                         | 0.152                          | 99.6    | 1.52      | 354.9                  | 1.58                     | 89                                |

<sup>a</sup> Determined by GC-FID analysis.



### 5.1.2 Different Excess

The general procedure is followed for these experiments with the following modifications

**Table S2.** Data for Different Excess Experiments

| Excess Experiment   | Diene (mg) | Diene (M) | Acrylate (mg) | Acrylate (M) | (dppp)CoBr <sub>2</sub> (mg) | (dppp)CoBr <sub>2</sub> (mmol) | Zn (mg) | Zn (mmol) | ZnBr <sub>2</sub> (mg) | ZnBr <sub>2</sub> (mmol) | Conversion of Diene (%) <sup>a</sup> |
|---------------------|------------|-----------|---------------|--------------|------------------------------|--------------------------------|---------|-----------|------------------------|--------------------------|--------------------------------------|
| Different Excess #1 | 49.6       | 0.151     | 58.2          | 0.17         | 95.7                         | 0.152                          | 99.6    | 1.52      | 355.7                  | 1.58                     | 97                                   |
| Different Excess #2 | 47.6       | 0.145     | 68.9          | 0.20         | 96.2                         | 0.153                          | 99.9    | 1.53      | 354.9                  | 1.58                     | 92                                   |
| Different Excess #3 | 49.9       | 0.152     | 108.1         | 0.31         | 95.5                         | 0.151                          | 100.6   | 1.55      | 354.5                  | 1.57                     | 94                                   |
| Different Excess #4 | 49.6       | 0.151     | 106.4         | 0.31         | 95.6                         | 0.152                          | 99.6    | 1.52      | 354.4                  | 1.57                     | 98                                   |
| Different Excess #5 | 99.1       | 0.302     | 110.5         | 0.32         | 95.9                         | 0.152                          | 100.1   | 1.54      | 350.0                  | 1.56                     | 98                                   |

<sup>a</sup> Determined by GC-FID analysis.

### 5.1.3 Stir Test

The general procedure is followed for these experiments with the following modifications

**Table S3.** Data for Stir Test Experiments

| Stir Time for Initial Catalyst Mixture | Diene (mg) | Diene (M) | Acrylate (mg) | Acrylate (M) | (dppp)CoBr <sub>2</sub> (mg) | (dppp)CoBr <sub>2</sub> (mmol) | Zn (mg) | Zn (mmol) | ZnBr <sub>2</sub> (mg) | ZnBr <sub>2</sub> (mmol) | Conversion of Diene (%) <sup>a</sup> |
|----------------------------------------|------------|-----------|---------------|--------------|------------------------------|--------------------------------|---------|-----------|------------------------|--------------------------|--------------------------------------|
| 5 min                                  | 50.3       | 0.153     | 105.7         | 0.307        | 96.0                         | 0.152                          | 99.9    | 1.53      | 356.5                  | 1.58                     | 90                                   |
| 30 min                                 | 50.3       | 0.153     | 105.7         | 0.307        | 96.0                         | 0.152                          | 99.9    | 1.53      | 356.5                  | 1.58                     | 90                                   |
| 1 hr                                   | 50.3       | 0.153     | 105.7         | 0.307        | 95.8                         | 0.152                          | 100.3   | 1.53      | 354.6                  | 1.57                     | 90                                   |
| 2 hr                                   | 50.3       | 0.153     | 105.7         | 0.307        | 95.8                         | 0.152                          | 100.5   | 1.54      | 353.8                  | 1.57                     | 90                                   |
| 8 hr                                   | 50.3       | 0.153     | 105.7         | 0.307        | 95.6                         | 0.152                          | 99.6    | 1.52      | 354.6                  | 1.57                     | 96                                   |

<sup>a</sup> Determined by GC-FID analysis.

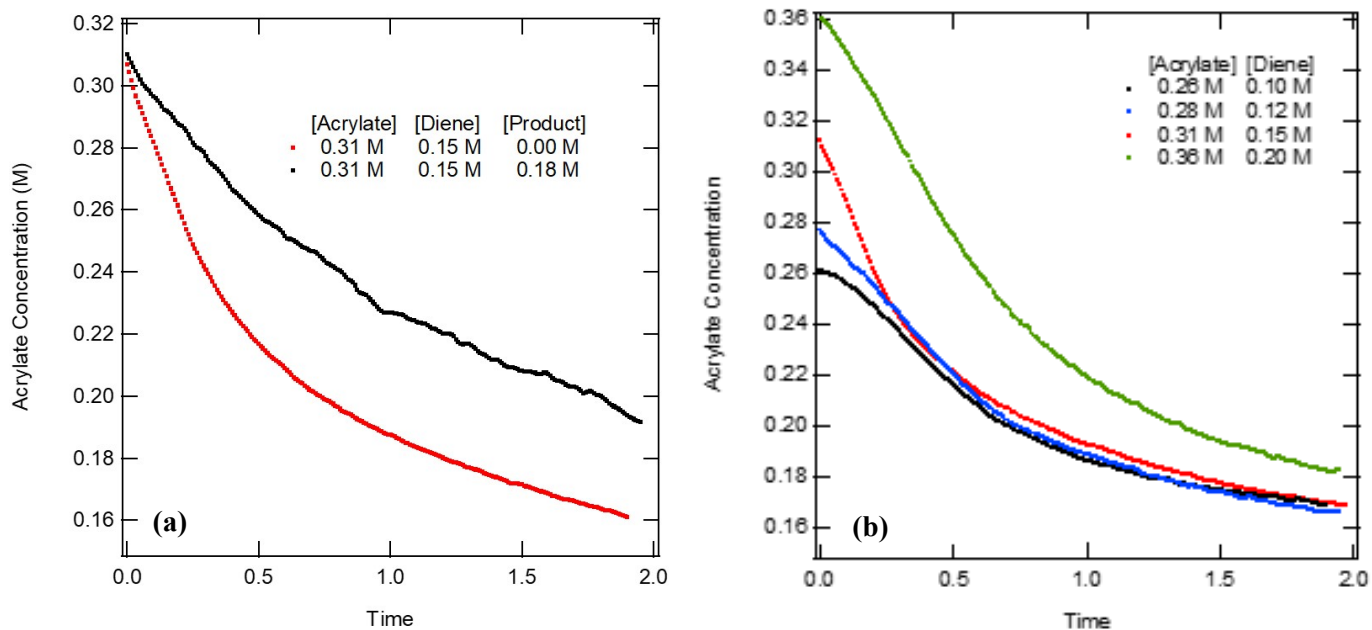

**Figure S2. (a) Product inhibition.** Red: acrylate 0.31 M; diene 0.15 M; product 0.0 M, reaction run for 2 h. Black: acrylate 0.31 M; diene 0.15 M; product 0.18 M, added together with the starting materials, reaction run for 2 h. See experimental details on p. S10. **(b) Same excess experiment.** Same excess experiments without time shift. Black: acrylate 0.26 M and diene 0.10 M. Blue: acrylate 0.28 M and diene 0.12 M. Red: acrylate 0.31 M and diene 0.15 M. Green: acrylate 0.36 M and diene 0.20 M.

### 5.1.4 Catalyst Order Test

The general procedure is followed for these experiments with the following modifications

**Table S4. Data for Catalyst Order Experiments**

| Catalyst Loading              | Diene (mg) | Diene (M) | Acrylate (mg) | Acrylate (M) | (dppp)CoBr <sub>2</sub> (mg) | (dppp)CoBr <sub>2</sub> (mmol) | Zn (mg) | Zn (mmol) | ZnBr <sub>2</sub> (mg) | ZnBr <sub>2</sub> (mmol) | Conversion of Diene (%) |
|-------------------------------|------------|-----------|---------------|--------------|------------------------------|--------------------------------|---------|-----------|------------------------|--------------------------|-------------------------|
| Normal                        | 49.9       | 0.152     | 107.4         | 0.312        | 95.5                         | 0.151                          | 100.6   | 1.54      | 354.5                  | 1.574                    | 94                      |
| Half Catalyst Loading         | 49.6       | 0.151     | 107.8         | 0.313        | 47.9                         | 0.076                          | 50.5    | 0.77      | 178.7                  | 0.794                    | 98                      |
| Three Thirds Catalyst Loading | 49.6       | 0.151     | 110.2         | 0.320        | 74.9                         | 0.119                          | 77.8    | 1.20      | 266.4                  | 1.18                     | > 99                    |

<sup>a</sup> Determined by GC-FID analysis.

### 5.1.5 Diene polymerization without catalyst Test

The general procedure is followed for these experiments with the following modifications

1. Diene amount: 0.152 M
2. Acrylate amount: 0.00
3. (dppp)CoBr<sub>2</sub> amount: 0
4. Zn amount: 0
5. ZnBr<sub>2</sub>: 0
6. DCE used: 4 mL
7. Ligand amount: 0.00
8. Conversion: 0%

### 5.1.6 Diene polymerization with catalyst Test

The general procedure was followed for these experiments with the following modifications

1. Diene amount: 0.148 M
2. Acrylate amount: 0.00
3. (dppp)CoBr<sub>2</sub> amount: 0.151 mmol
4. Zn amount: 1.50 mmol
5. ZnBr<sub>2</sub>: 1.55 mmol
6. DCE used: 4 mL
7. Ligand amount: 0.00
8. Conversion: 20%

### 5.1.7 Product Inhibition

The general procedure was followed for these experiments with the following modifications. The relative rates can be seen in the graphs below.

1. Diene amount: 0.151 M
2. Acrylate amount: 0.31 M
3. (dppp)CoBr<sub>2</sub> amount: 0.152 mmol
4. Zn amount: 1.54 mmol
5. ZnBr<sub>2</sub>: 1.59 mmol
6. DCE used: 4 mL
7. Product added: 0.182 M
8. Conversion: 79%

## 6.1 Isotopic Labeling Experiments

### 6.1.1 Reversibility of $\beta$ -hydride elimination

Inside a glove-box, to an oven-dried 8 mL screw cap vial equipped with a stir bar and screw septum cap, (dppp)Co(II)Br<sub>2</sub> (10.2 mg, 0.016 mmol), Zn (9.5 mg, 0.15 mmol), and ZnBr<sub>2</sub> (32.4 mg, 0.144 mmol) were added. Upon the starting of stirring, DCM (1 mL); stored with molecular sieves, was added to the vial. The solution was allowed to stir undisturbed for 2 hr. After the 2 hour period, methyl acrylate-d<sub>3</sub> (23.3 mg, 0.26 mmol) was added neat the solution via a 100  $\mu$ L syringe. Directly after this addition 2,3-dimethyl-1,3-butadiene ( 20.3 mg, 0.25 mmol) was added to the solution via a 100  $\mu$ L syringe. The reaction was allowed to react for three hr. After which the reaction was stopped with a 1:1 solution by volume of diethyl ether and pentanes. The reaction was purified by evaporating off all the solvents and starting materials to yield pure deuterated product (17.00 mg, 0. 099 mmol, 39.6 %yield).

### 7.1 Co(I) activity vs Co(I)<sup>+</sup> activity

Inside a glove-box, to an oven dried 8 mL screw cap vial equipped with a stir bar and screw septum cap, (dppp)<sub>3</sub>Co<sub>2</sub>(I)Br<sub>2</sub> (5.5 mg, 0.009 mmol) was added. DCM (0.5 mL), that was stored with molecular sieves, was added to the vial. The solution was allowed to stir for 2 hr, after which, methyl acrylate (17.2 mg, 0.20 mmol) and 2,3-dimethyl-1,3-butadiene ( 14.5 mg, 0.18 mmol) in 0.5 mL DCM was added. The reaction was allowed to proceed for 2 hr. The reaction was then stopped with a 1:1 solution of diethyl ether and hexanes. The progress was monitored via gas chromatography. The G.C. showed no product formation. In a parallel reaction inside a glove-box, to an oven dried 8 mL screw cap vial equipped with a stir bar and screw septum cap, (dppp)<sub>3</sub>Co<sub>2</sub>(I)Br<sub>2</sub> (6.6 mg, 0.01 mmol) and ZnBr<sub>2</sub> (32.2 mg, 0.143 mmol) was added. DCM (0.5 mL), that was stored with molecular sieves, was added to the vial. The solution was allowed to stir for 2 hr, after which, methyl acrylate (17.2 mg, 0.20 mmol) and 2,3-dimethyl-1,3-butadiene (14.5 mg, 0.18 mmol) in 0.5 mL DCM was added. The reaction was allowed to proceed for 2 hr. The reaction was then stopped with a 1:1 solution of diethyl ether and hexanes. The progress was monitored via gas chromatography The G.C. showed 19.2% conversion of diene.

## 8.1 UV-Vis studies

### 8.1.1 Background

A background of DCE was taken. To a modified cuvette that allowed the preservation of air sensitive materials, 2 mL of freshly distilled DCE was added. The cuvette was placed in the in-situ UV-VIS and a wavelength scan was performed from 1100 nm to 190 nm. This reading was used as the background for the rest of the UV-Vis experiments.

### 8.1.2 (dppp)<sub>3</sub>Co<sup>(0)</sup><sub>2</sub>Br<sub>2</sub>

To a clean 4 mL oven dried glass vial, 2.2 mg of (dppp)<sub>3</sub>Co(I)<sub>2</sub>Br<sub>2</sub><sup>2</sup> (recrystallized from THF upon diffusion with hexanes) and DCE (2 mL) were added to the vial. While in a glove-box, the solution was transferred to a modified cuvette. The cuvette was taken out of the glove-box and placed in the in-situ UV-Vis and a wavelength scan from 1100 nm to 190 nm was performed.

### 8.1.3 (dppp)Co<sup>(II)</sup>Br<sub>2</sub>

To a clean 4 mL oven dried glass vial, 2.5 mg of (dppp)Co<sup>(II)</sup>Br<sub>2</sub> and DCE (2 mL) were added to the vial. While in a glove-box, the solution was transferred to a modified cuvette. The cuvette was taken out of the glove-box and placed in the in-situ UV-VIS and a wavelength scan from 1100 nm to 190 nm was performed.

### 8.1.4 [(dppp)Co<sup>(I)</sup>]<sup>+</sup>

While inside a glove-box, to a clean 20 mL oven dried glass vial, a magnetic stir bar, (dppp)Co<sup>(II)</sup>Br<sub>2</sub> (48.00 mg, 0.0761 mmols, 1 eq), activate Zn dust (49.00 mg, 0.778 mmols, 10.22 eq) and ZnBr<sub>2</sub> (171.00 mg, 0.759 mmols, 9.98 eq) and DCE (2 mL) were added. The solution was allowed to stir for 2 hr inside the glove-box. After this period, the solution changed colors from a blue/green to a dark red/brown. After a 2 hour stirring period, 0.100 mL of the solution was transferred to a modified cuvette and then DCE (1.900 mL) was added to the cuvette to make a 0.002 M solution of (dppp)Co(I)<sup>+</sup>. The cuvette was taken out of the glove-box and placed in the in-situ UV-VIS and a wavelength scan from 1100 nm to 190 nm was taken every minute for four min.

### 8.1.4 Diene Coordination

To a freshly prepared sample of [(dppp)Co<sup>(I)</sup>]<sup>+</sup>, prepared as described above at 0.002 M, 2,3-dimethyl-1,3-butadiene in DCE was added to the cuvette (0.176 molar, 0.044 mmols, 11 eq) and a wavelength scan from 1100 nm to 190 nm was taken every minute for five min.

### 8.1.5 Acrylate Coordination

To a freshly prepared sample of [(dppp)Co<sup>(I)</sup>]<sup>+</sup>, prepared as described above at 0.002 M, methyl acrylate in DCE was added to the cuvette (0.464 molar, 0.232 mmols, 58 eq) and a wavelength scan from 1100 nm to 190 nm was taken every minute for four min.

### 8.1.6 Diene vs Acrylate Competition Test

To a freshly prepared sample of [(dppp)Co<sup>(I)</sup>]<sup>+</sup>, prepared as described above at 0.002 M, methyl acrylate in DCE was added to the cuvette (0.464 molar, 0.232 mmols, 58 eq) and a wavelength scan from 1100 nm to 190 nm was taken every minute for four min. After this, 2,3-dimethyl-1,3-butadiene in DCE was added to the cuvette (0.176 molar, 0.044 mmols, 11 eq) and a wavelength scan from 1100 nm to 190 nm was taken every minute for five min.

### 8.1.7 Synthesis and UV-Vis Analysis of Cationic Cobalt(I) from (dppp)<sub>3</sub>Co<sub>2</sub><sup>(I)</sup>Br<sub>2</sub> crystal.

To a modified cuvette, crystalline (dppp)<sub>3</sub>Co<sub>2</sub><sup>(I)</sup>Br<sub>2</sub> (3.4 mg, 0.002 mmole) and NaBARF (3.9 mg, 0.004 mmole), and 2 mL of DCE were added. The solution was allowed to stir for 15 min after which, UV-Vis spectra was recorded with a wavelength scan from 1100 nm to 190 nm.

### 8.1.8 Stir Time Analysis UV-Vis

While inside a glove-box, to a clean 20 mL oven dried glass vial, a magnetic stir bar, (dppp)Co<sup>(II)</sup>Br<sub>2</sub> (19.80 mg, 0.031 mmols, 1 eq), activate Zn dust (20.3 mg, 0.31 mmols, 10.00 eq) and ZnBr<sub>2</sub> (70.00 mg, 0.31 mmols, 10.00 eq) and DCE (2 mL) were added. The solution was allowed to stir for 2 hr inside the glove-box. After this period, the solution changed colors from a blue/green to a dark

red/brown. After a 120 min, 150 min, 240 min, and 270 min stirring period, 0.050 mL of the solution was transferred to a modified cuvette and then DCE (1.950 mL) was added to the cuvette to make a 0.002 M solution of (dppp)Co(I)<sup>+</sup>. The cuvette was taken out of the glove-box and placed in the in-situ UV-VIS and a wavelength scan from 1100 nm to 190 nm was taken. The UV-Vis reading was performed.

#### **8.1.9 Preparation of the Catalyst for Product Investigation:**

While inside a glove-box, to a clean 20 mL oven dried glass vial, a magnetic stir bar, (dppp)Co(II)Br<sub>2</sub> (47.5 mg, 0.075 mmols, 1 eq), activate Zn dust (47.4 mg, 0.729 mmols, 9.7 eq) and ZnBr<sub>2</sub> (173.0 mg, 0.769 mmols, 10.3 eq) and DCE (2 mL) were added. The solution was allowed to stir for 2 hr inside the glove-box. After this period, the solution changed colors from a blue/green to a dark red/brown. After a 2 hour stirring period, 0.100 mL of the solution was transferred to a modified cuvette and then DCE (1.900 mL) was added to the cuvette to make a 0.0019 M solution of (DPPP)Co(I)<sup>+</sup>. The cuvette was taken out of the glove-box and placed in the in-situ UV-VIS and a wavelength scan from 1100 nm to 190 nm was taken every minute. To this cuvette product (17.94 mg, 0.11 mmole, 28.73 eq) in DCE (0.100 mL) was added to the catalyst three times and the UV-Vis was taken. This process was repeated two more times for a total addition of 53.82 mg, 0.32 mmole, and 86.19 eq of catalyst was added. After all the addition of the product, five UV-Vis scans were taken (across five minutes).

#### **8.1.10 Preparation of the Catalyst for Product+Diene Investigation:**

While inside a glove-box, to a clean 20 mL oven dried glass vial, a magnetic stir bar, (dppp)Co(II)Br<sub>2</sub> (47.5 mg, 0.075 mmols, 1 eq), activate Zn dust (47.4 mg, 0.729 mmols, 9.7 eq) and ZnBr<sub>2</sub> (173.0 mg, 0.769 mmols, 10.3 eq) and DCE (2 mL) were added. The solution was allowed to stir for 2 hr inside the glove-box. After this period, the solution changed colors from a blue/green to a dark red/brown. After a 2 hour stirring period, 0.100 mL of the solution was transferred to a modified cuvette and then DCE (1.900 mL) was added to the cuvette to make a 0.0019 M solution of (DPPP)Co(I)<sup>+</sup>. The cuvette was taken out of the glove-box and placed in the in-situ UV-VIS and a wavelength scan from 1100 nm to 190 nm was taken every minute. To this cuvette product (26.78 mg, 0.16 mmole, 43.24 eq) was added. UV-Vis readings were taken for two minutes. Diene (37.79 mg, 0.46 mmole, 124.2 eq) was added. UV-Vis readings were taken for three minutes.

#### **8.1.11 Preparation of the Catalyst for Dilution Investigation:**

While inside a glove-box, to a clean 20 mL oven dried glass vial, a magnetic stir bar, (dppp)Co(II)Br<sub>2</sub> (47.5 mg, 0.075 mmols, 1 eq), activate Zn dust (47.4 mg, 0.729 mmols, 9.7 eq) and ZnBr<sub>2</sub> (173.0 mg, 0.769 mmols, 10.3 eq) and DCE (2 mL) were added. The solution was allowed to stir for 2 hr inside the glove-box. After this period, the solution changed colors from a blue/green to a dark red/brown. After a 2 hour stirring period, 0.100 mL of the solution was transferred to a modified cuvette and then DCE (1.900 mL) was added to the cuvette to make a 0.0019 M solution of (DPPP)Co(I)<sup>+</sup>. The cuvette was taken out of the glove-box and placed in the in-situ UV-VIS and a wavelength scan from 1100 nm to 190 nm was taken every minute. To this solution, 0.15 mL, 0.10 mL, and 0.25 mL of DCE were added to make 0.0039 M, 0.0036 M, 0.0034 M, and 0.0031 M solutions of the cobalt complex. A separate solution of DPPPCo(I)<sup>+</sup> was made following the procedure above. To this solution, 0.10, 0.20, 0.30, and 0.40 mL of DCE were added to make 0.0019, 0.0018, 0.0017, and 0.0016 M solutions of DPPPCo(I)<sup>+</sup>.

**Table S5.** Effect of Counter-ions on the Rate of Reaction

|                                | 0 min<br>(% conversion) | 5 min<br>(% conversion) | 15 min<br>(% conversion) | 25 min<br>(% conversion) |
|--------------------------------|-------------------------|-------------------------|--------------------------|--------------------------|
| ZnBr <sub>2</sub><br>(average) | 0.0 ± 0.0               | 0.0 ± 0.0               | 0.0 ± 0.0                | 5.3 ± 3.1                |
| NaBArF (average)               | 0.0 ± 0.0               | 38.0 ± 7.3              | 70.0 ± 4.3               | 89.3 ± 3.3               |
| ZnBr <sub>2</sub> (trial 1)    | 0.0                     | 0.0                     | 0.0                      | 1.0                      |
| ZnBr <sub>2</sub> (trial 2)    | 0.0                     | 0.0                     | 0.0                      | 7.0                      |
| ZnBr <sub>2</sub> (trial 3)    | 0.0                     | 0.0                     | 0.0                      | 8.0                      |
| NaBArF (trial 1)               | 0.0                     | 48.0                    | 68.0                     | 90.0                     |
| NaBArF (trial 2)               | 0.0                     | 31.0                    | 66.0                     | 85.0                     |
| NaBArF (trial 3)               | 0.0                     | 35.0                    | 76.0                     | 93.0                     |

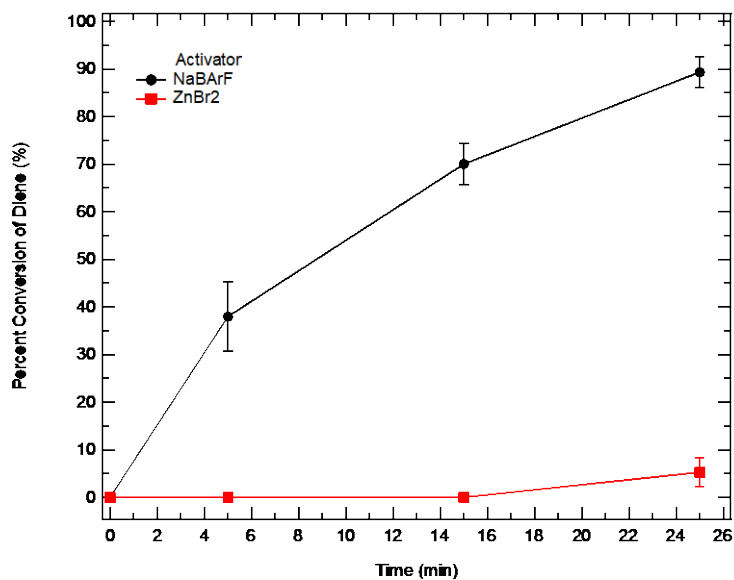

**Figure S3.** The average percent conversion (with standard deviation) of the test shown above. The red line represents the percent conversion using ZnBr<sub>2</sub> activation across twenty five minutes. The black line represents the percent conversion using NaBArF activation across twenty five minutes. The percent conversions was found using gas chromatography and an internal standard of dedecane.

## 9.1 Reaction Engineering

### 9.1.1 High Concentration Batch Reaction

While inside a glove-box, to an oven dried 50.00 mL Schlenk flask was charged with a magnetic stir bar, (dppp)CoBr<sub>2</sub> (96.2 mg, 0.152 mmol, 0.01 eq), Zn (95.8 mg, 1.47 mmol, 0.1 eq), and ZnBr<sub>2</sub> (345 mg, 1.53 mmol, 0.1 eq). The flask was then taken and attached to a Schlenk line. Once on the Schlenk line, the flask was evacuated to 0.2 mmHg, and then filled with argon. This process was repeated 2 more times. After the line has been evacuated, the Schlenk flask was open to the Schlenk line while under high argon flow. The flask itself was then evacuated to 0.2 mmHg and then filled with argon until it was at atmospheric pressure. This process was repeated 2 more times. To the flask DCE was added (2 mL) and the mixture was allowed to stir for 2 hr. After the 2 hr, methyl acrylate (1.6 mL, 17.8 mmol, 1.1 eq), 2,3-dimethyl-1,3-butadiene (1.8 mL, 15.9 mmol, 1.0 eq), and dodecane (30 µL), as an internal standard, were added to the flask. The reaction was allowed to react for eighteen hr after which it was stopped by adding a 1:1 mixture of pentane:diethyl ether. The resulting suspension was filtered through a short pad of silica and a small aliquot was analyzed via GC-FID to yield product in 48% conversion.

## 10.1 Stir Time Comparison

### 10.1.1 Stir Time Analysis of ZnBr<sub>2</sub> vs NaBArF

To an 8 mL vial, (dppp)CoBr<sub>2</sub> (9.5 mg, 0.015 mmole, 0.095 eq), Zn (11 mg, 0.17 mmole, 1.08 eq), and NaBArF (14.8 mg, 0.017, 0.108 eq) and a magnetic spin vane was added. To the 8 mL vial, DCM (0.50 mL) was added. The mixture was allowed to stir for five minutes. After the 5 minute stir period, 2,3-dimethyl-1,3-butadiene (13 mg, 0.158 mmole, 1 eq), methyl acrylate (15 mg, 0.17 mmole, 1.08 eq), and DCM (0.5 mL) were added to the solution. The solution was allowed to stir for five minutes. After five minutes, the reaction progress was monitored by G.C. by taking out a small aliquot and diluting this with approximately 1 mL of 1:1 ether:hexanes mixture. The reaction was again monitored after 15 min and then again after 25 minutes. This procedure was repeated two additional times.

To an 8 mL vial, (dppp)CoBr<sub>2</sub> (9.5 mg, 0.015 mmole, 0.095 eq), Zn (11 mg, 0.17 mmole, 1.08 eq), and ZnBr<sub>2</sub> (5.5 mg, 0.024, 0.15 eq) and a magnetic spin vane was added. To the 8 mL vial, DCM (0.50 mL) was added. The mixture was allowed to stir for five minutes. After the 5 minute stir period, 2,3-dimethyl-1,3-butadiene (13 mg, 0.158 mmole, 1 eq), methyl acrylate (15 mg, 0.17 mmole, 1.08 eq), and DCM (0.5 mL) were added to the solution. The solution was allowed to stir for five minutes. After five minutes, the reaction progress was monitored by G.C. by taking out a small aliquot and diluting this with approximately 1 mL of 1:1 ether:hexanes mixture. The reaction was again monitored after 15 min and then again after 25 minutes. This procedure was repeated two additional times.

The results for the above test can be seen in the table below. The conversion was calculated by using an internal standard of dodecane with gas chromatography.



## 11.1 Spectral Analysis

### 11.1.1 Typical In-Situ IR Spectrums

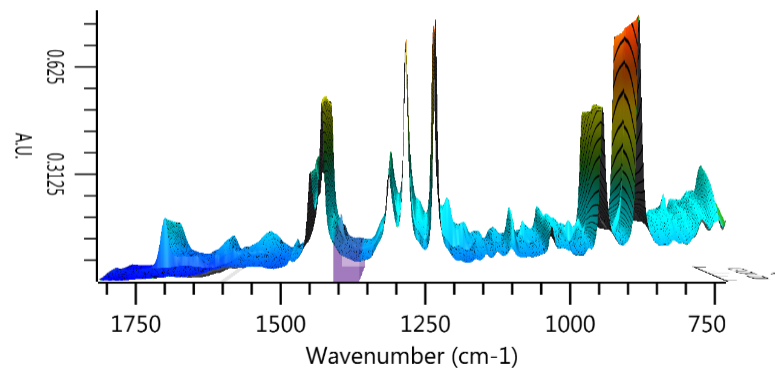

METTLER TOLEDO

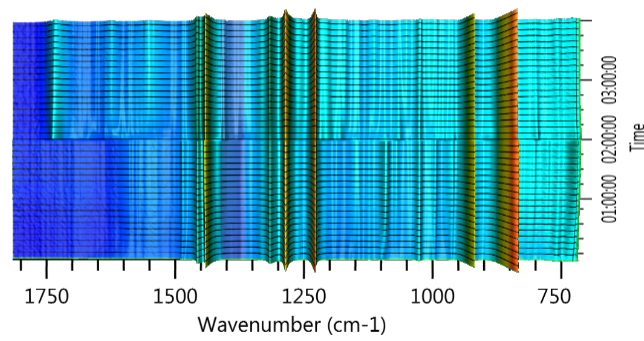

METTLER TOLEDO

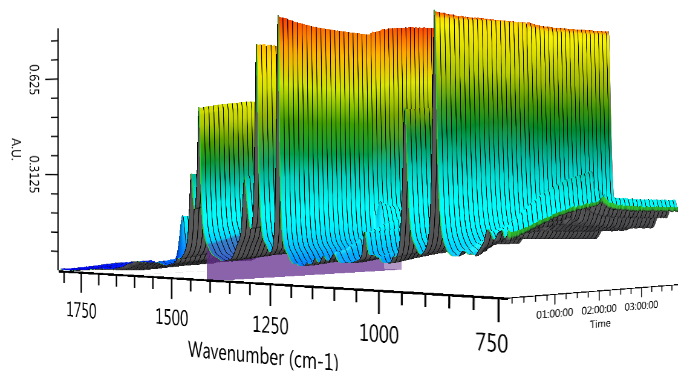

**Figure S4:** IR spectrum under standard reaction conditions (0.31 M methyl acrylate, 0.15 M 2,3-dimethyl-1,3-butadiene, 100 mg (dppp)CoBr<sub>2</sub>, 100 mg Zn, 355 mg ZnBr<sub>2</sub>, and 4 mL DCE) from 1800 cm<sup>-1</sup> to 750 cm<sup>-1</sup> from the start of the stirring of the (dppp)CoBr<sub>2</sub>, Zn, and ZnBr<sub>2</sub> process (0 hr) to the end of the reaction (4 hr). Front view, aerial view, and side view respectively.

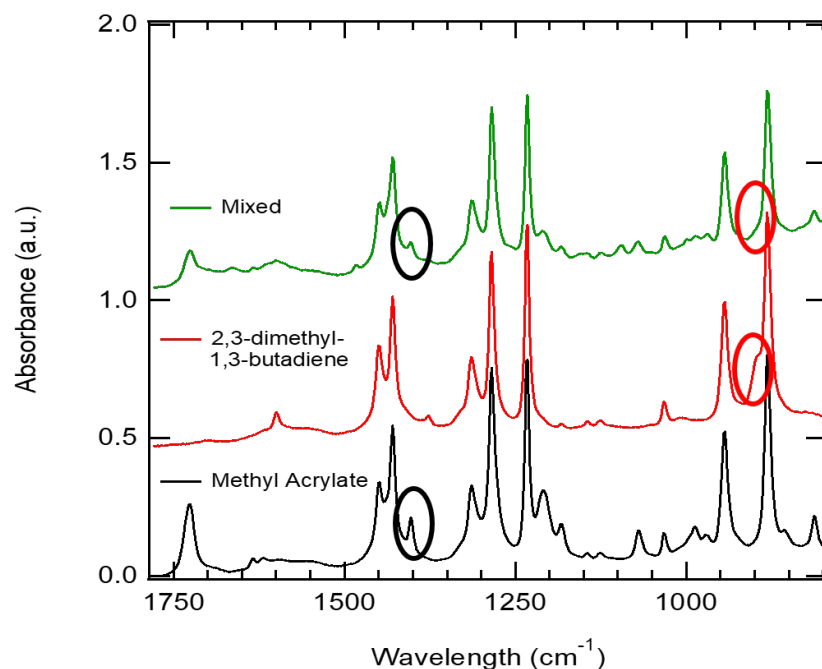

**Figure S5.** The IR spectrum of methyl acrylate (black), 2,3-dimethyl-1,3-butadiene (red), and a mixture of the 2 (green). Methyl acrylate has a characteristic peak at 1402 cm<sup>-1</sup> and 2,3-dimethyl-1,3-butadiene has a characteristic peak at 896 cm<sup>-1</sup>.

Analysis of the IR spectra shows a decrease in the intensities of the peaks that are attributed to methyl acrylate (1402 cm<sup>-1</sup>) and 2,3-dimethyl-1,3-butadiene (896 cm<sup>-1</sup>) when they were reacted with the cobalt catalyst ((dppp)CoBr<sub>2</sub>, Zn, and ZnBr<sub>2</sub>). The frequency of 1402 cm<sup>-1</sup> is attributed to the scissoring

vibration of the terminal =CH<sub>2</sub> group in the methyl acrylate.<sup>5</sup> This peak as can be seen in Figure S4 and S5 to have slight overlap with the DCE peak. However, this proved to not affect the data interpretation. The frequency at 896 cm<sup>-1</sup> is attributed to the =CH<sub>2</sub> out of plane wagging in 2,3-dimethyl-1,3-butadiene.<sup>6</sup> Again this peak is seen to have overlap with a DCE peak, however, it proved to agree well with the decrease seen in 1402 cm<sup>-1</sup> as the reaction proceeded and thus was used to monitor the 2,3-dimethyl-1,3-butadiene concentration.

### 11.1.2 UV-Vis Spectra

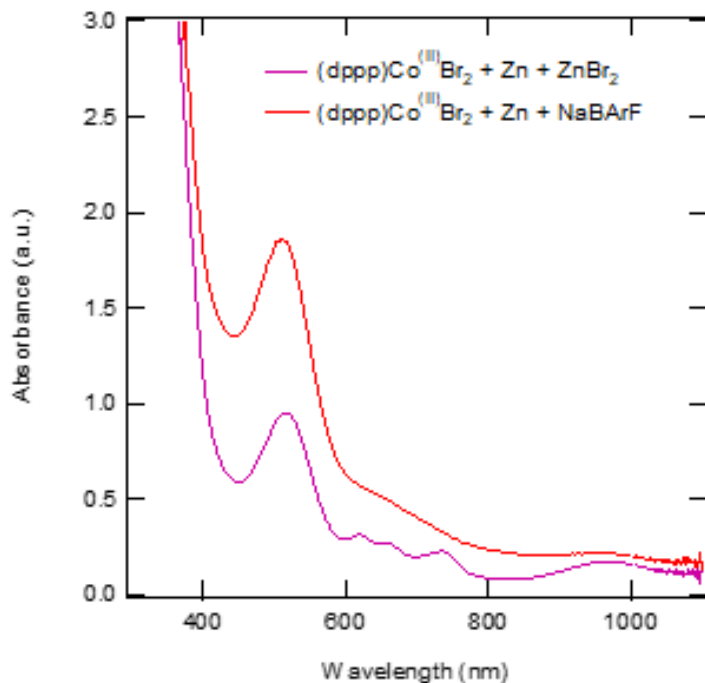

**Figure S6.** (dppp)Co(II)Br<sub>2</sub> activated with ZnBr<sub>2</sub> (purple) and (dppp)Co(II)Br<sub>2</sub> activated with NaBARF (Red) both stirred for 2 hr at the same concentration.

The peak attributed to the active catalyst (517 nm) can be seen in Figure S6. It is seen for the species activated by ZnBr<sub>2</sub> (purple) there are peaks present in the range of 600-750 nm. These peaks are attributed to the Co(II) species, and thus not full activation of the active catalyst is seen after the stir time used (ca. 2 hr). The red line represents the activation with NaBARF, the peaks between 600-750 nm are seen to completely go away. This suggests that the activation is complete after the allotted stir time (ca. 2 hr).

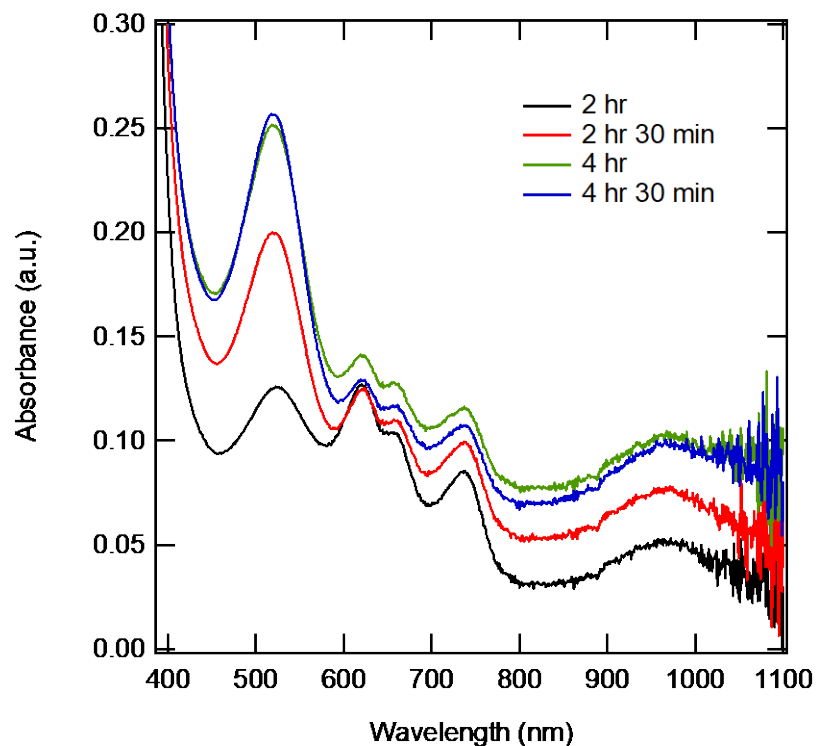

**Figure S7.** The supernatant of a reaction mixture of (dppp)Co(II)Br<sub>2</sub>, Zn, and ZnBr<sub>2</sub> was mixed for 2 hr, 2 hr thirty min, four hr, and four hr and thirty min. The peak at 517 nm stops increasing at four hr and thirty min.

Figure S7 shows stir time analysis via UV-Vis. The peak at 517 nm (the peak attributed to the active catalyst) is seen to hit a maximum after ca. four hr. This suggest that after this amount of stirring, as much of the active catalyst has been formed as possible and the induction period is complete.

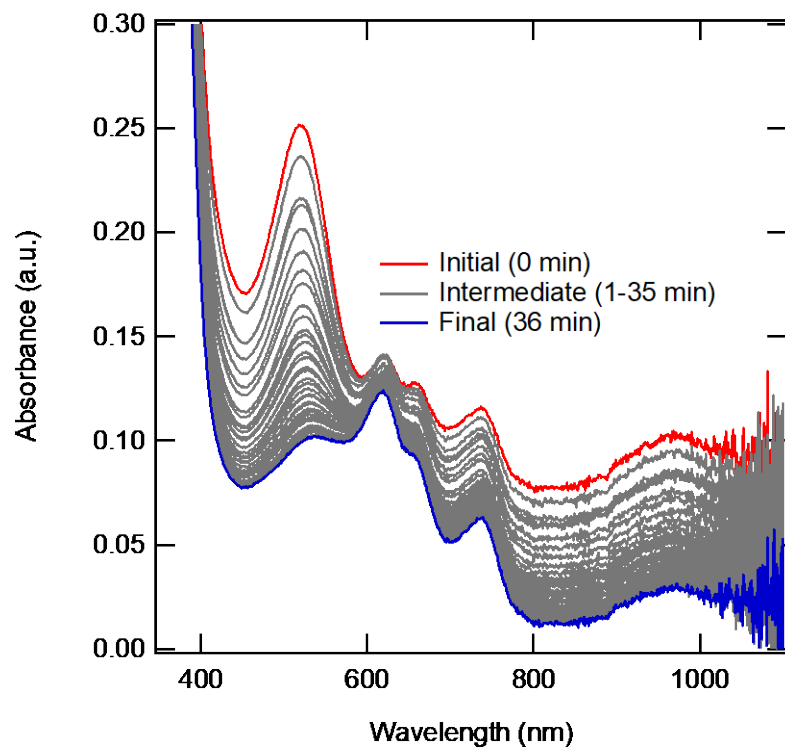

**Figure S8.** The supernatant of a reaction mixture of  $(dppp)Co(II)Br_2$ , Zn, and  $ZnBr_2$  was mixed for 2 hr. The UV-Vis spectrum from 0 to 36 min, nonsmoothed. The initial intensity (0 min) is red with the final intensity (36 min) is blue, all intermediate intensities are gray.

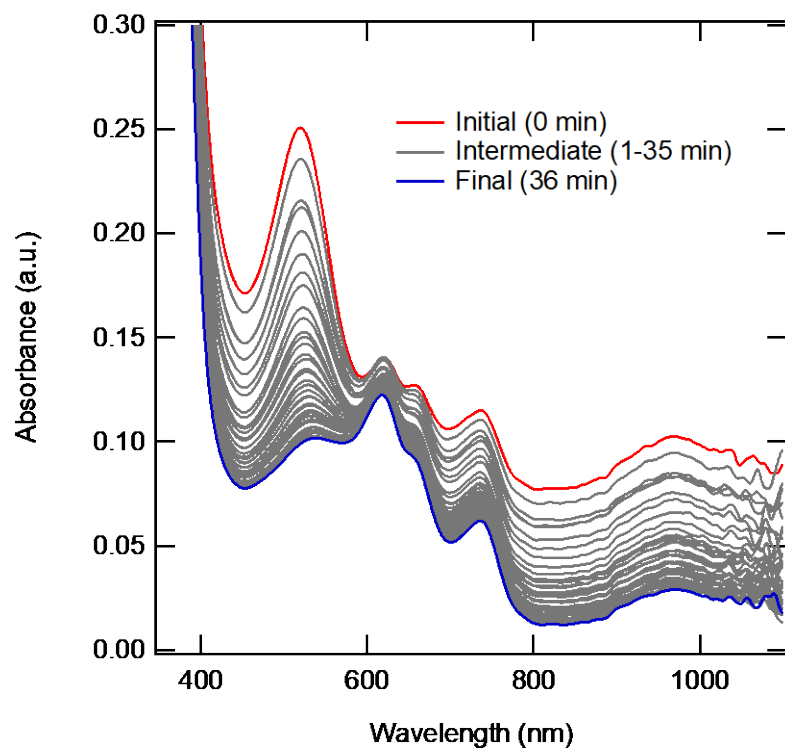

**Figure S9.** The supernatant of a reaction mixture of  $(\text{dppp})\text{Co}(\text{II})\text{Br}_2$ , Zn, and  $\text{ZnBr}_2$  was mixed for 2 hr. The UV-Vis spectrum from 0 to 36 min, smoothed. The initial intensity (0 min) is red with the final intensity (36 min) is blue, all intermediate intensities are gray.

Figure S8 and S9 show the change in the active catalyst UV-Vis spectra with time (across a 36 minute duration). Most notably is the decrease in the 517 nm peak. This test was performed in anaerobic and moisture free conditions. This suggest that the active catalyst deactivates through disproportion pathways into most likely  $\text{Co}(\text{II})$  and  $\text{Co}(0)$  species as can be seen in the decrease of the  $\text{Co}(\text{I})$  signature peak at ca. 900 nm and the increase (relative) of the peaks attributed to the  $\text{Co}(\text{II})$  species, the peaks between the 600-750 nm.<sup>7,8,9,10,11</sup>

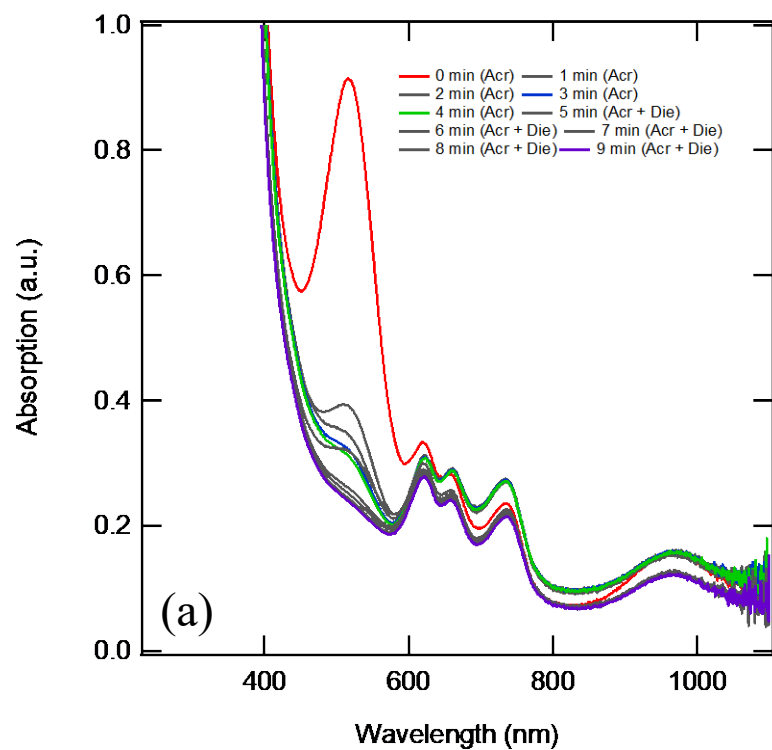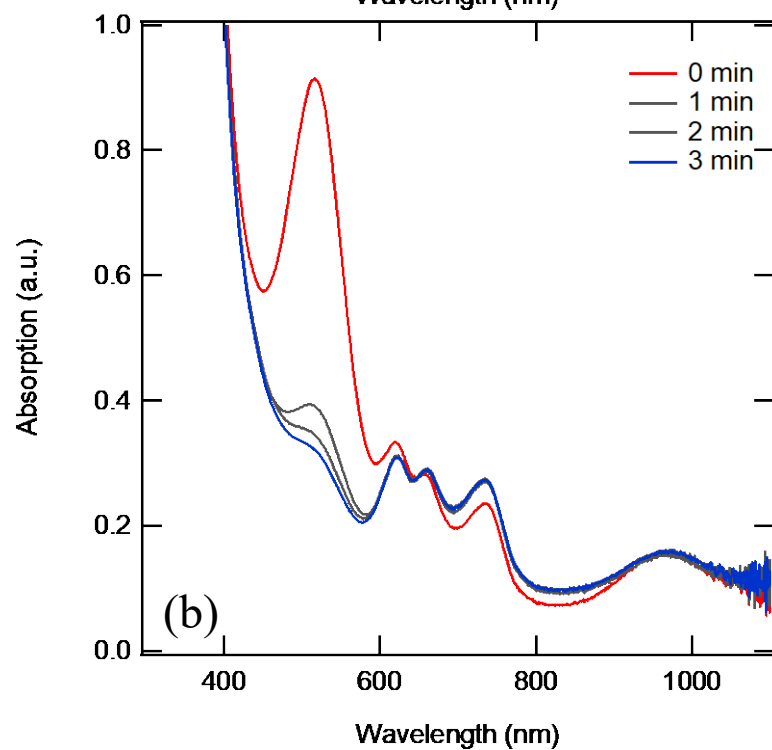

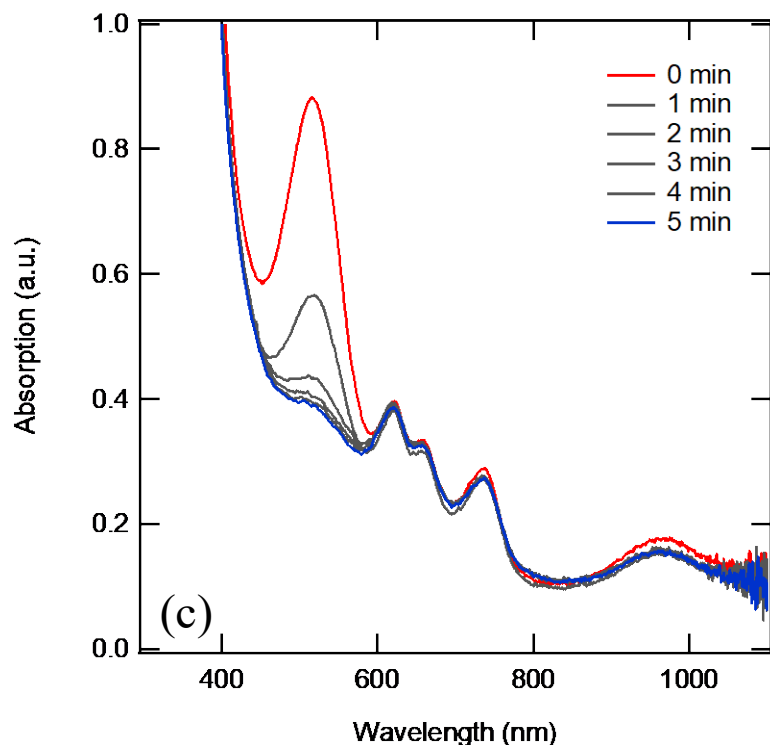

**Figure S10.** The supernatant of a reaction mixture of (dppp)Co(II)Br<sub>2</sub>, Zn, and ZnBr<sub>2</sub> was mixed for two hours after which, the following additions were performed: (a) Methyl acrylate in DCE added (0.11 mmoles, 0.22 M, 58 eq with respect to cobalt species) added to [(dppp)Co(I)]<sup>+</sup> (0.0038 mmole, 1.9 mM), readings were taken for 4 minutes. 2,3-Dimethyl-1,3-butadiene in DCE added (0.044 mmoles, 0.044 M, 11.63 eq with respect to cobalt species) added to (dppp)Co(I)<sup>+</sup> (0.0038 mmole, 19 mM), readings were taken for 5 minutes. (b) Methyl acrylate in DCE added (0.11 mmoles, 0.22 M, 58 eq with respect to cobalt species) added to [(dppp)Co(I)]<sup>+</sup> (0.0038 mmole, 1.9 mM). (c) 2,3-Dimethyl-1,3-butadiene in DCE added (0.044 mmoles, 0.044 M, 11.63 eq with respect to cobalt species) added to DPPPCo(I)<sup>+</sup> (0.0038 mmole, 19 nM)

Figure S10 shows the affects that methyl acrylate or 2,3-dimethyl-1,3-butadiene have on the UV-Vis spectrum of the active catalyst. Methyl acrylate is shown to both decrease the peak of the active catalyst (517 nm) and increase the peak of the Co(II) species, 600-750 nm. 2,3-dimethyl-1,3-butadiene is shown to decrease the peak at 517 nm, but at a slower rate than the methyl acrylate, and it is decreases the peaks attributed to the Co(II) species, 600-750 nm. When both methyl acrylate and 2,3-dimethyl-1,3-butadiene are added, the change in the UV-Vis spectrum is shown to resemble that of the 2,3-dimethyl-1,3-butadiene more strongly than the change caused by the



methyl acrylate. This suggest that the 2,3-dimethyl-1,3-butadiene is coordinating to the active catalyst more quickly than the methyl acrylate.<sup>7,8,9,10,11</sup> The calculated time constants can be seen below.

**Diene:** The absorbance was considered to be equivalent to concentration. The data was fit to an exponential function of the form:

$$\text{Abs}=0.76e^{(-0.17t)}$$

The natural log was taken of this function in order to obtain a straight line and the function obtained was of the form:

$$\text{Ln}(\text{Abs})=-0.17t-0.274$$

The rate constant, k, was calculated to be 0.17 Abs/min. The time constant was calculated to be **5.88 min/Abs**.

**Acrylate:** The absorbance was considered to be equivalent to concentration. The data was fit to an exponential function of the form:

$$\text{Abs}=0.79e^{(-0.27t)}$$

The natural log was taken of this function in order to obtain a straight line and the function obtained was of the form:

$$\text{Ln}(\text{Abs})=-0.27t-0.233$$

The rate constant, k, was calculated to be 0.27 Abs/min. The time constant was calculated to be **3.7 min/Abs**.

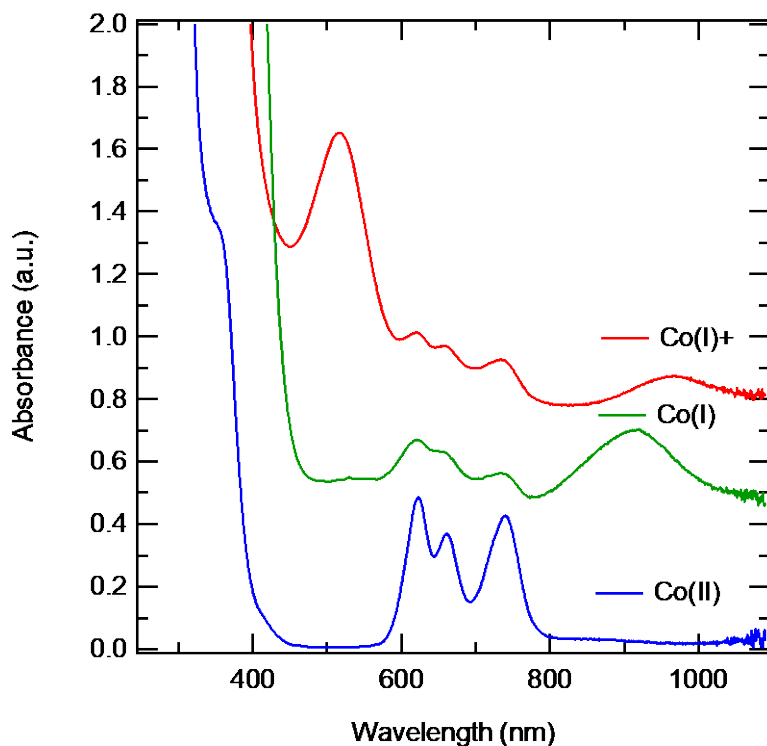

**Figure S11.** (dppp)CoBr<sub>2</sub> (Blue), (dppp)<sub>3</sub>Co<sub>2</sub><sup>D</sup>Br<sub>2</sub> (Green), and [(dppp)Co<sup>0</sup>]<sup>+</sup> (Red). (dppp)CoBr<sub>2</sub> (Blue) and (dppp)<sub>3</sub>Co<sub>2</sub>Br<sub>2</sub> (Green) were obtained from pure crystallized material of the named compound. [(dppp)Co<sup>0</sup>]<sup>+</sup> (Red) was obtained by the following: the supernatant of a reaction mixture of (dppp)CoBr<sub>2</sub>, Zn, and ZnBr<sub>2</sub> was mixed for 2 hr. The three spectra are offset (Y-axis) to allow for ease of reading.

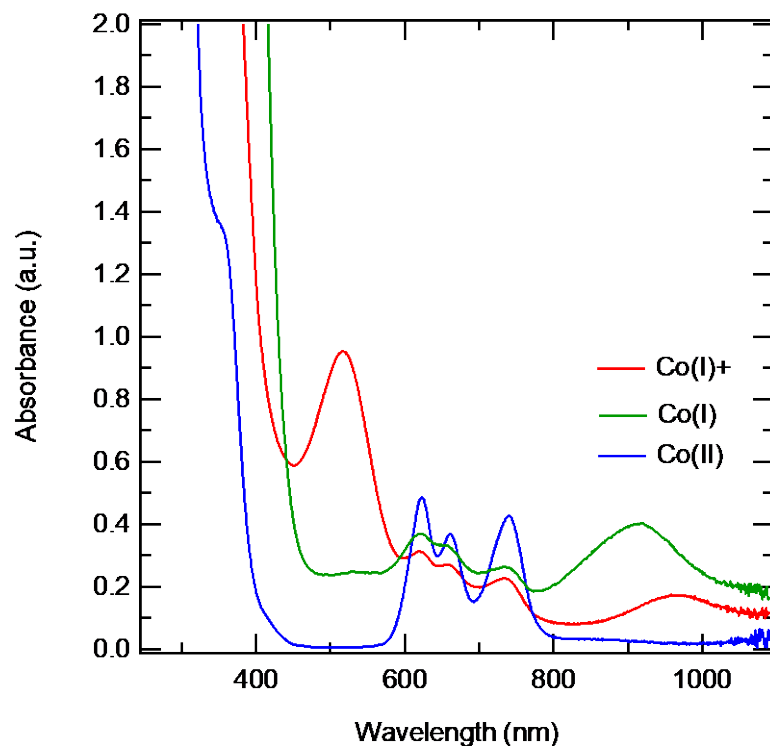

**Figure S12.**  $(\text{dppp})\text{CoBr}_2$  (Blue),  $(\text{dppp})_3\text{Co}_2^{(I)}\text{Br}_2$  (Green), and  $[(\text{dppp})\text{Co}^{(I)}]^+$  (Red).  $(\text{dppp})\text{CoBr}_2$  (Blue) and  $(\text{dppp})_3\text{Co}_2\text{Br}_2$  (Green) were obtained from pure crystallized material of the named compound.  $[(\text{dppp})\text{Co}^{(I)}]^+$  (Red) was obtained by the following: the supernatant of a reaction mixture of  $(\text{dppp})\text{CoBr}_2$ , Zn, and  $\text{ZnBr}_2$  was mixed for 2 hr.

Figure S11 and S12 show the isolated spectra for  $(\text{dppp})\text{CoBr}_2$ ,  $(\text{dppp})_3\text{Co}_2^{(I)}\text{Br}_2$  crystals, and the active species  $[(\text{dppp})\text{Co}^{(I)}]^+$  species. The  $(\text{dppp})\text{CoBr}_2$  species shows three peaks between 600-700 nm which are indicative of a Co(II) d-d transitions. The  $(\text{dppp})\text{Co}^{(I)}\text{Br}$  crystals show both a merging of the peaks between 600-750 nm and the formation of a peak at 913 nm, that matches the reported spectra of different Co(I) species. The active species  $[(\text{dppp})\text{Co}^{(I)}]^+$  shows both a shift in the 913 nm peak to ca. 960 nm and the formation of an intense peak at 517 nm. This matches reported spectra of other cationic cobalt species.<sup>7,8,9,10,11</sup>

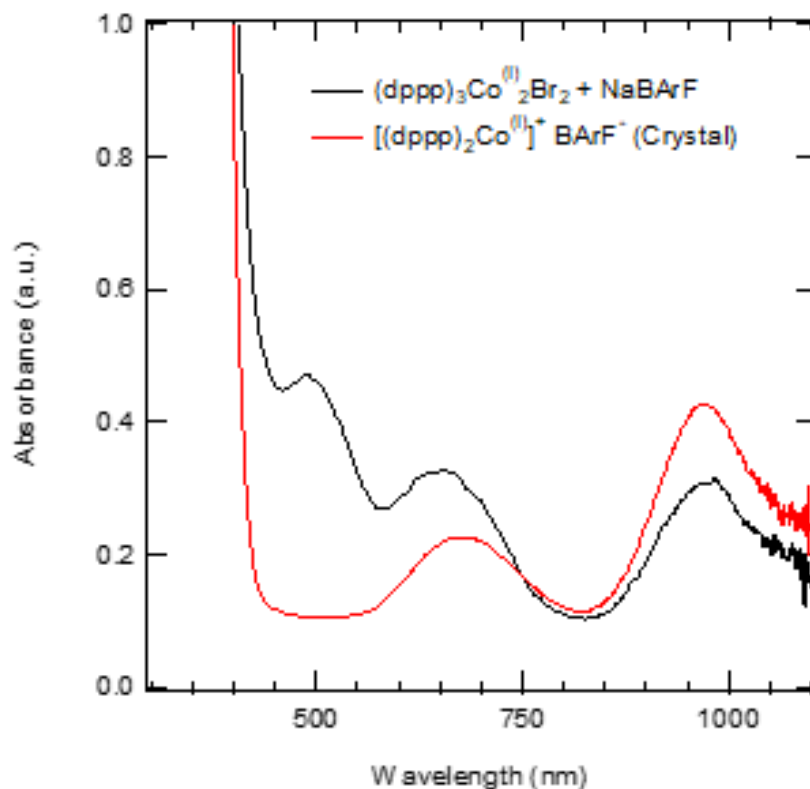

**Figure S13.** The UV-Vis spectrum of crystalline  $(dppp)_3Co_2Br_2$  with the addition of NaBARF compared to the crystal structure of  $[(dppp)_2Co(I)]^+ BARF^-$ . The peak attributed to the active catalyst is at ca. 500 nm. This peak is not seen in the crystalline  $[(dppp)_2Co^{(0)}]^+ BARF^-$ .

Figure S13 shows a comparison of an isolated  $[(dppp)_2Co^{(0)}]^+ BARF^-$  species to that of activated crystalline  $(dppp)_3Co_2^{(I)}Br_2$  (activated using NaBARF). It can be seen that upon activation of the crystalline Co(I) complex with NaBARF, a peak at ca. 500 nm appears. This matches closely with the experimental spectra for the active catalyst that was achieved by reducing  $(dppp)Co(II)Br_2$  with Zn and then activating it with  $ZnBr_2$ . This suggests that the cationic crystal structure  $[(dppp)_2Co^{(0)}]^+ BARF^-$  obtained is not the active catalyst, but instead it is an inactive species.

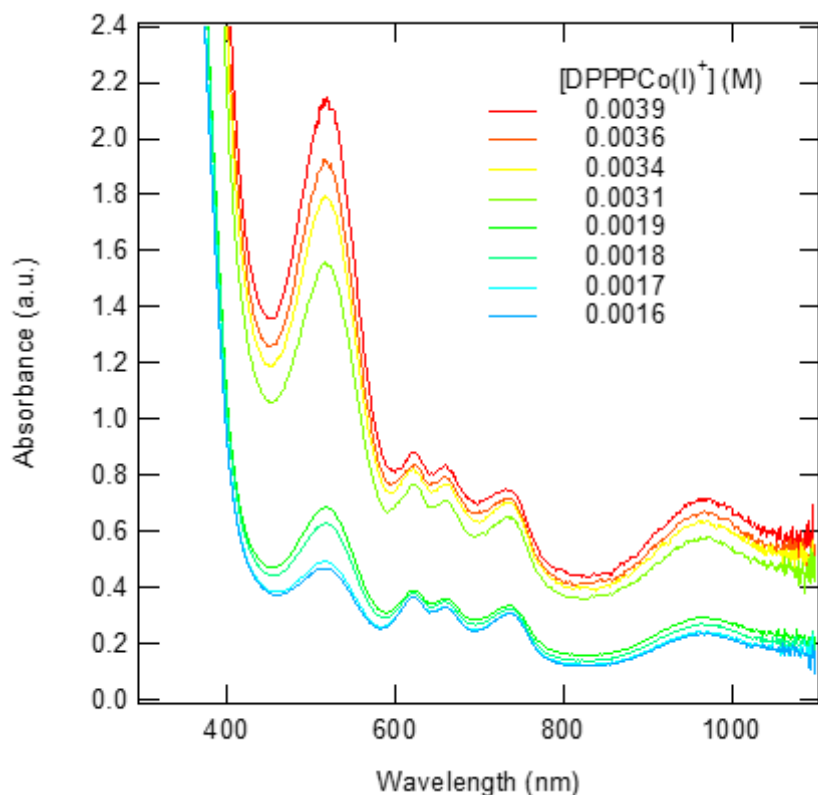

**Figure S14.** The supernatant of a reaction mixture of (dppp)Co(II)Br<sub>2</sub>, Zn, and ZnBr<sub>2</sub> was mixed for two hours after which, the solution was diluted to make the following molarity solutions of (dppp)Co(II)Br<sub>2</sub>: 0.0039 M, 0.0036 M, 0.0034 M, 0.0031 M, 0.0019, 0.0018, 0.0017, and 0.0016 M

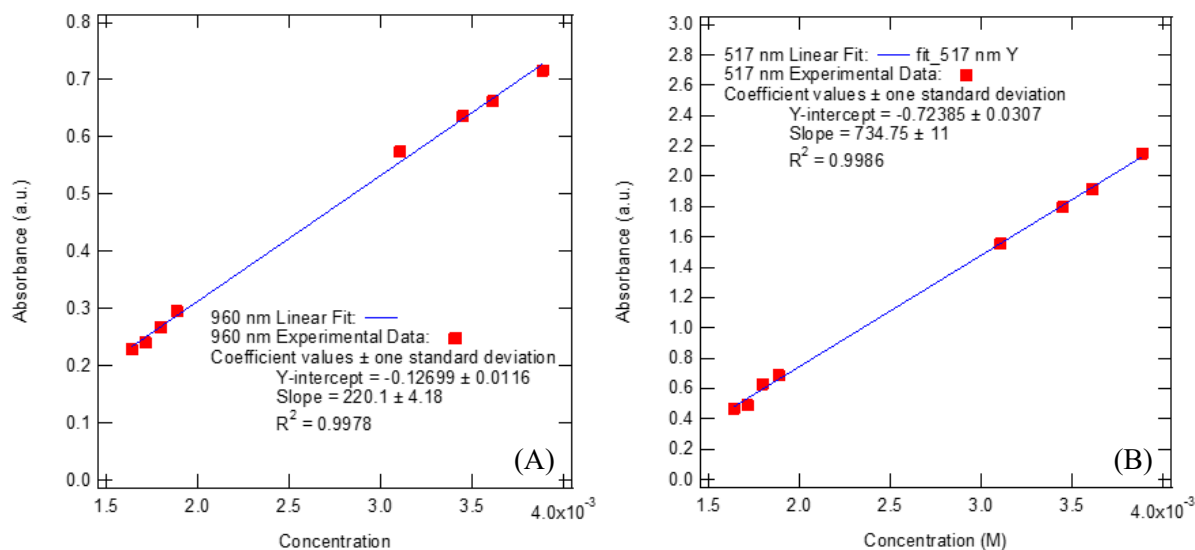

**Figure S15.** The absorbance values for 960 nm and 517 nm graphed against the concentration.

Figure S14 shows the absorbance of the (dppp)Co(II)Br<sub>2</sub> catalyst across multiple dilutions. Figure S15 shows the absorbance graphed against concentration. The absorbance is shown to have a linear relationship with concentration within the range shown.

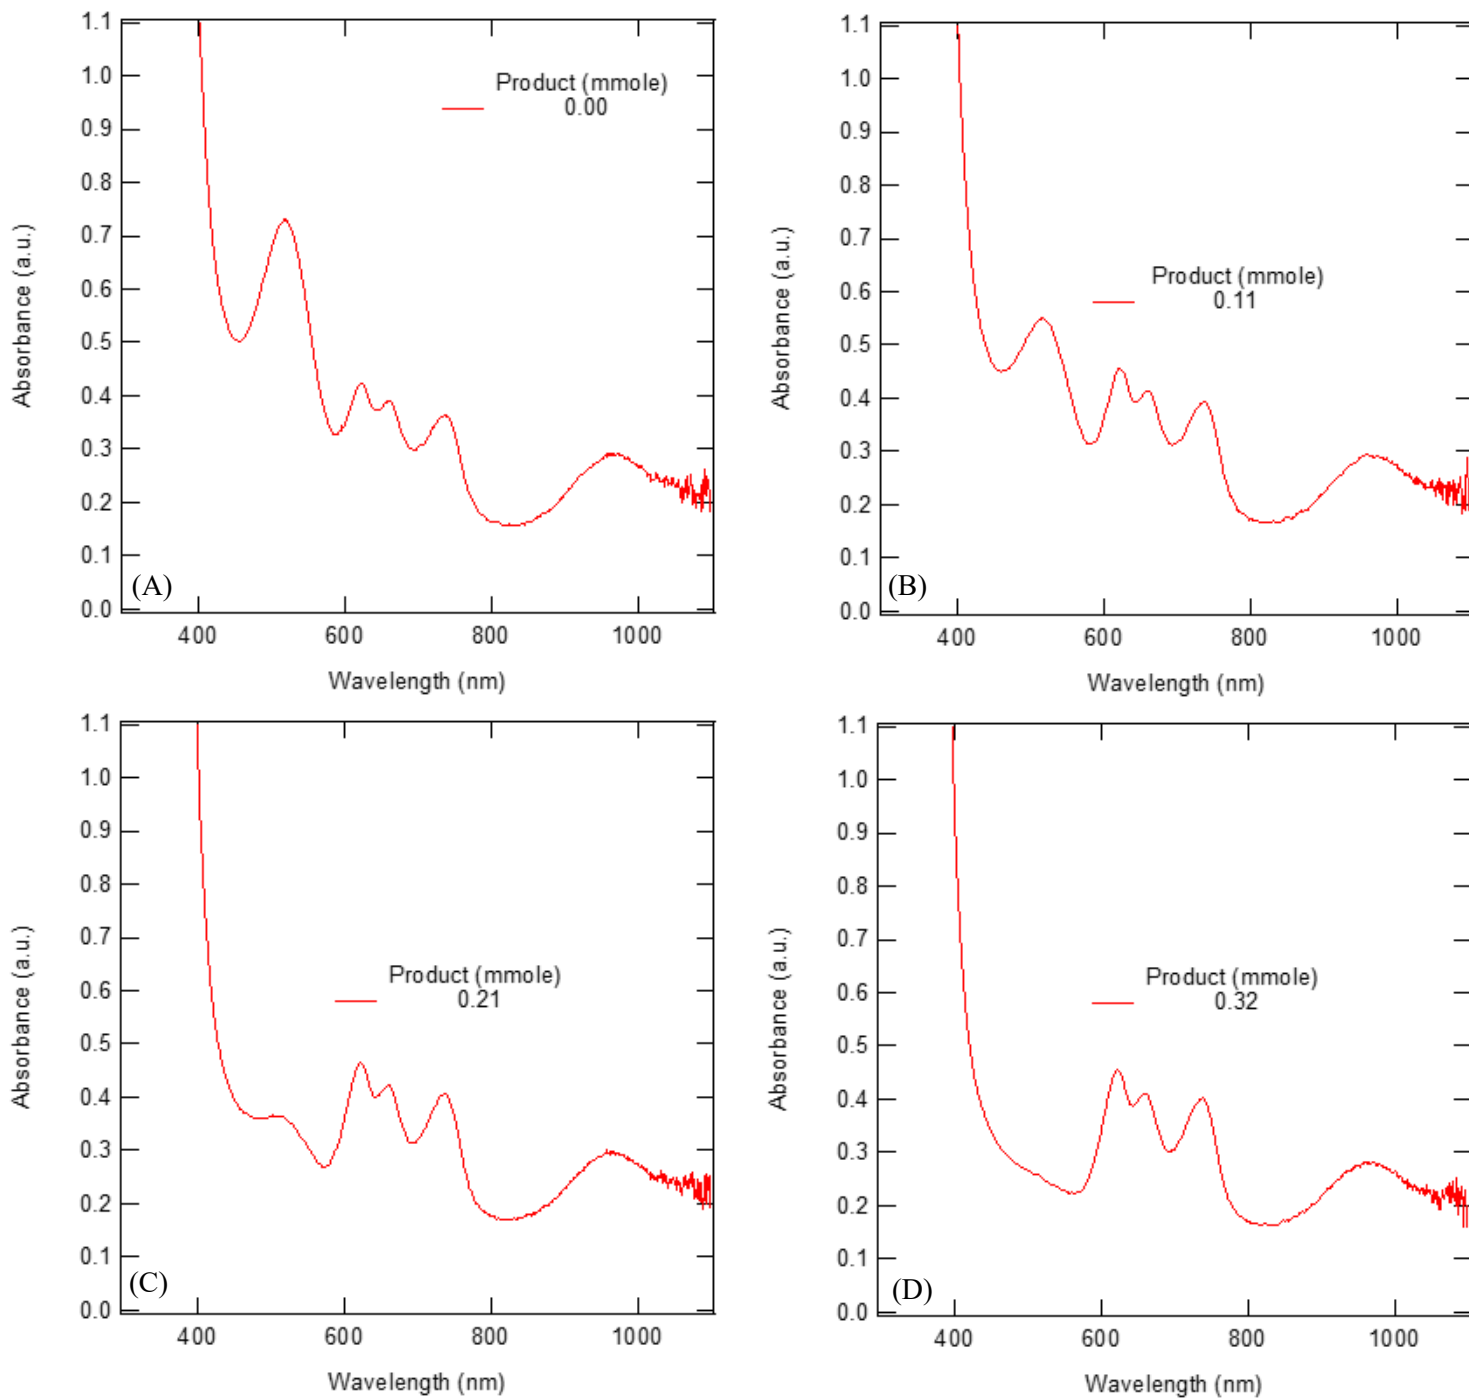

**Figure S16.** The supernatant of a reaction mixture of (dppp)Co(II)Br<sub>2</sub>, Zn, and ZnBr<sub>2</sub> was mixed for two hours as described in section 8.1.9. Product was added to the solution of 0.0019 M (dppp)Co(II)Br<sub>2</sub> solution to obtain the following amount of product: 0.11 mmole (b), 0.22 mmole (d), and 0.32 mmole (d).

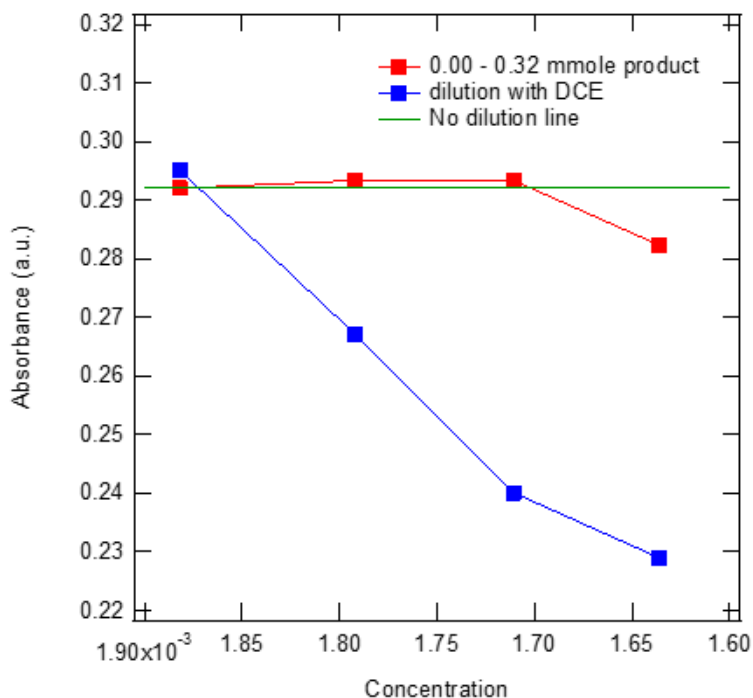

**Figure S17.** The profile of the absorbance at 960 nm from Figure S14 and S16. The blue line shows the effect of dilution with DCE on the absorbance spectra for (dppp)Co(I)<sup>+</sup>. The red line shows the effect of product being added (resulting in a concentration of (dppp)Co(I)<sup>+</sup> that is the same as the concentration shown in the blue line) to the absorbance spectra of (dppp)Co(I)<sup>+</sup>.

Figure S17 shows that product is able to bind to the catalyst. As product is added, the absorbance at 960 nm is shown to stay approximately constant (red line). When the same dilution is made without product, the peak at 960 nm is shown to decrease (blue line). Figure S18 shows that diene binds to (dppp)Co(I)<sup>+</sup> over the product when diene is in large enough concentrations. This is shown by the decrease in the peak at ca. 960 nm.

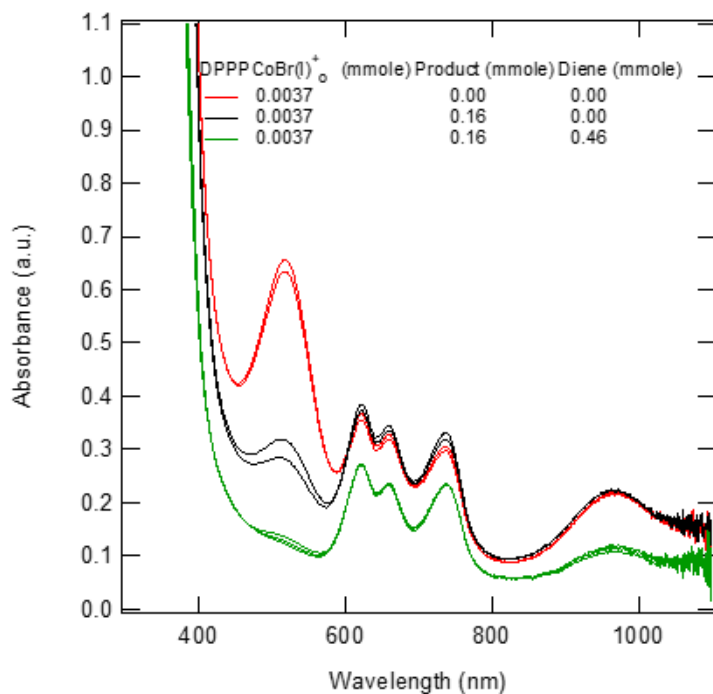

**Figure S18.** The supernatant of a reaction mixture of (dppp)Co(II)Br<sub>2</sub>, Zn, and ZnBr<sub>2</sub> was mixed for two hours as described in section 8.1.10. 0.0019 M solution of (DPPP)Co(I)<sup>+</sup> was prepared. To this 0.16 mmole product was added. After two minutes 0.46 mmole diene was added to the solution.

### 11.1.3 $^1\text{H}$ and $^{13}\text{C}$ NMR of Pure product

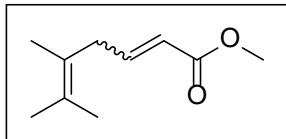

**Methyl 5,6-dimethylhepta-2,5-dienoate:** The reaction between 2,3-dimethyl-1,3-butadiene (145.20 mg, 1.77 mmol) and methyl acrylate (249.52, 2.90 mmol) in DCM and (dppp)CoBr<sub>2</sub> (153.00 mg, 0.24 mmol), Zn (156 mg, 0.69 mmol), and ZnBr<sub>2</sub> (590 mg, 0.67 mmol) and were reacted for 4 hr. Upon completion, the reaction was filtered through a short pad of silica using 50:50 diethyl ether:hexanes (5 mL). The product was isolated by evaporating off the solvent to yield the titled compound as a colorless oil. 90% yield from G.C. analysis.  $^1\text{H}$  NMR (400 MHz, CDCl<sub>3</sub>):  $\delta$  6.90 (dt, , J = 15.66 Hz, 6.54, 1 H), 5.77 (dt, J = 15.46, 1.66, 1 H), 3.71 (s, 3 H), 2.89 (d, 6.60 , 2 H), 1.67 (s, 3 H), 1.63 (s, 6 H).  $^{13}\text{C}$  NMR (400 MHz, CDCl<sub>3</sub>):  $\delta$  167.58, 147.57, 127.65, 123.49, 51.69, 37.74, 20.90, 20.56, 18.94

### 11.1.4 NMR Analysis of (dppp)Co(m)Br<sub>n</sub> Species

All the NMR samples were made inside the N<sub>2</sub>- filled glove-box (Specific amount of each species is mentioned on the corresponding spectra). The NMR tube was capped which was wrapped by Teflon tape.

1. (dppp)CoBr<sub>2</sub> (10 mg dissolved in 0.6mL CDCl<sub>3</sub> in NMR tube) – no  $^{31}\text{P}$  Signal
2. (dppp)CoBr<sub>2</sub> (10 mg, 0.0158 mmol, 1 equiv. ) and Zn (10 mg, 0.158 mmol, 10 equiv.) dissolved in 0.6mL CDCl<sub>3</sub> in NMR tube. NMR took after 15 min –  $^{31}\text{P}$  (243 MHz, CDCl<sub>3</sub>)  $\delta$  -21.87, 15.47.
3. (dppp)CoBr<sub>2</sub> (10 mg, 0.0158 mmol, 1 equiv.), Zn (10 mg, 10 equiv.), and ZnBr<sub>2</sub> (7mg, 2 equiv.) dissolved in 0.6 mL CDCl<sub>3</sub> in NMR tube.  $^{31}\text{P}$  NMR took after 30 min.  $^{31}\text{P}$  (243 MHz, CDCl<sub>3</sub>)  $\delta$  -21.89 (No peak at  $\delta$  ~ 15.47)
4. (dppp)CoBr<sub>2</sub> (10 mg, 0.0158 mmol, 1 equiv. ), Zn (10 mg, 10 equiv.), and NaBARF (18mg, 2 equiv.) dissolved in 0.6 mL CDCl<sub>3</sub> in NMR tube.  $^{31}\text{P}$  NMR took after 30 min.  $^{31}\text{P}$  (243 MHz, CDCl<sub>3</sub>)  $\delta$  -21.29

### 11.1.5 $^1\text{H}$ and $^{13}\text{C}$ NMR of Deuterated product

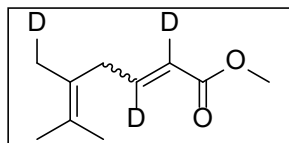

**d<sub>3</sub>-Methyl 5,6-dimethylhepta-2,5-dienoate:** The reaction between 2,3-dimethyl-1,3-butadiene ( 20.3 mg, 0.25 mmol) and d<sub>3</sub>-methyl acrylate (23.3 mg, 0.26 mmol) in DCM and (dppp)CoBr<sub>2</sub> ((10.2 mg, 0.016 mmol), Zn (9.5 mg, 0.15 mmol), and ZnBr<sub>2</sub> (32.4 mg, 0.144 mmol) and were reacted for 3 hr.

Upon completion, the reaction was filtered through a short pad of silica using 50:50 diethyl ether:pentanes (5 mL). The product was isolated by evaporating off the solvent to yield the titled compound as a colorless oil. 39.6 % yield by G.C.  $^1\text{H}$  NMR (600 MHz, CDCl<sub>3</sub>):  $\delta$  3.71 (s, 3 H), 2.89 (s, 2 H), 1.67 (s, 3 H), 1.63 (s, 6 H).  $^{13}\text{C}$  NMR (600 MHz, CDCl<sub>3</sub>):  $\delta$  167.42, 147.57, 127.44, 123.32, 51.508, 37.4203, 20.70, 20.1 (t, 19.5 Hz, CDH<sub>2</sub>), 18.75

## **$^1\text{H}$ and $^{13}\text{C}$ NMR and Chromatograms**



Sample Name: MGMH\_031ACR\_015DIE\_82818\_POST

```

=====
Acq. Operator   : GRAY
Acq. Instrument : Instrument 1                Location : Vial 1
Injection Date  : 8/28/2018 6:30:12 PM
                                           Inj Volume : 1 µl
Acq. Method     : C:\CHEM32\1\METHODS\MH_MG_50_5MIN_70_15_MIN_250_5MIN.M
Last changed    : 7/16/2018 5:12:02 PM by Gray
Analysis Method : C:\CHEM32\1\DATA\JON\JG-02-119-COL.D\JG.M
Last changed    : 2/21/2019 3:44:48 PM by mp
                 (modified after loading)
Method Info     : General Higher BP that correlates to Stambuli Group's GCMS - 30 min
  
```

Additional Info : Peak(s) manually integrated

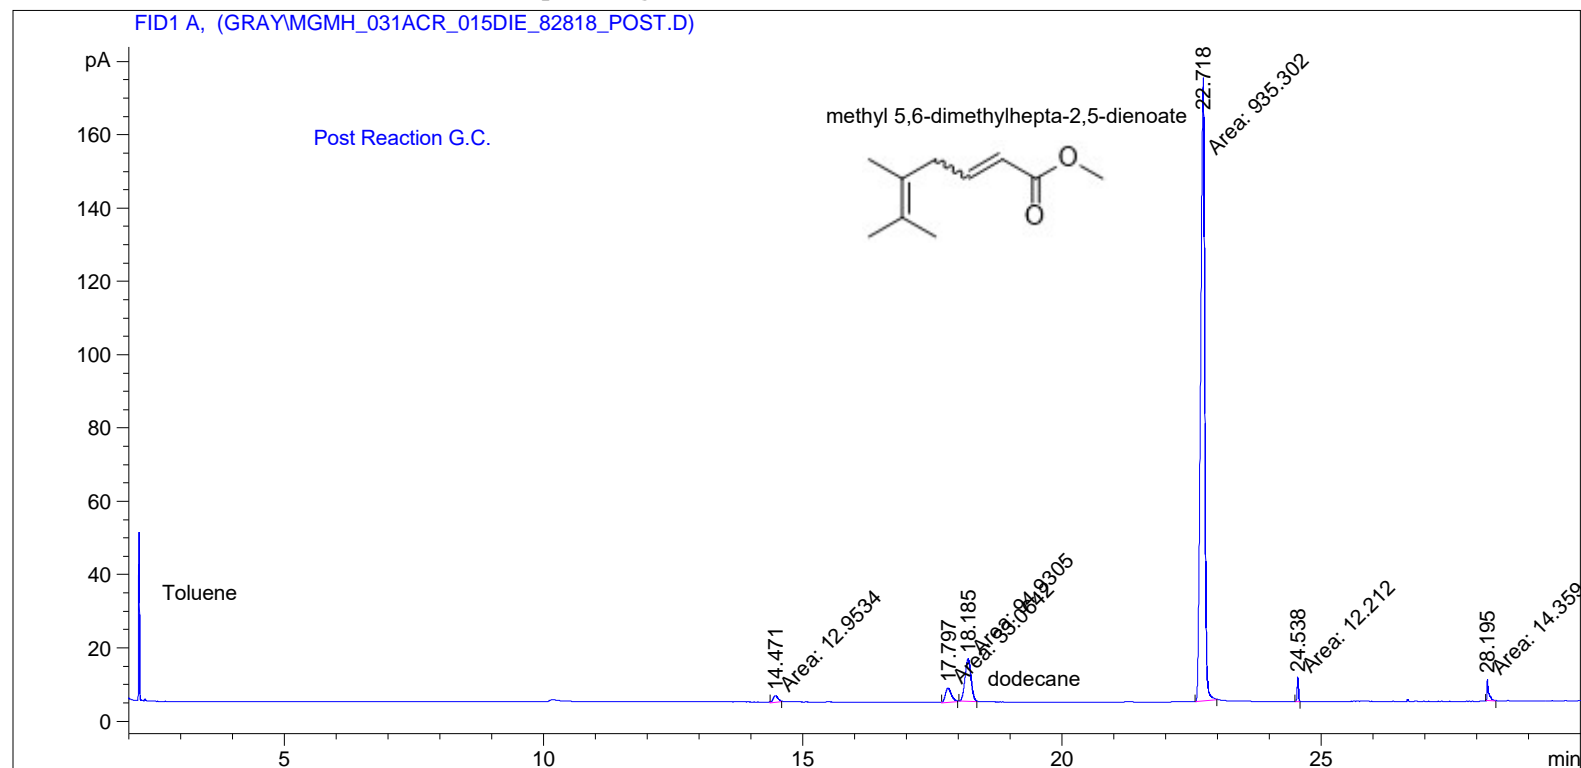

```

=====
                          Area Percent Report
=====
  
```

```

Sorted By      :      Signal
Multiplier:    :      1.0000
Dilution:      :      1.0000
Use Multiplier & Dilution Factor with ISTDs
  
```

Signal 1: FID1 A,

| Peak # | RetTime [min] | Type | Width [min] | Area [pA*s] | Height [pA] | Area %  |                            |
|--------|---------------|------|-------------|-------------|-------------|---------|----------------------------|
| 1      | 1.183         | VV   | 0.0101      | 47.14670    | 72.71666    | 4.09983 | 2,3-dimethyl-1,3-butadiene |
| 2      | 14.471        | MM   | 0.1131      | 12.95340    | 1.90940     | 1.12641 |                            |

Sample Name: MGMH\_031ACR\_015DIE\_82818\_POST

| Peak # | RetTime [min] | Type | Width [min] | Area [pA*s] | Height [pA] | Area %   |                                       |
|--------|---------------|------|-------------|-------------|-------------|----------|---------------------------------------|
| 3      | 17.797        | MM   | 0.1391      | 33.06422    | 3.96246     | 2.87523  |                                       |
| 4      | 18.185        | MM   | 0.1360      | 94.93047    | 11.63571    | 8.25506  | dodecane                              |
| 5      | 22.718        | MM   | 0.0917      | 935.30182   | 170.06023   | 81.33288 | methyl 5,6-dimethylhepta-2,5-dienoate |
| 6      | 24.538        | MM   | 0.0304      | 12.21197    | 6.68881     | 1.06194  |                                       |
| 7      | 28.195        | MM   | 0.0412      | 14.35902    | 5.80433     | 1.24865  |                                       |

Totals : 1149.96759 272.77760

=====  
\*\*\* End of Report \*\*\*

Sample Name: mgmh\_031acr\_015die\_82818\_pre

```
=====
Acq. Operator   : gray
Acq. Instrument : Instrument 1                Location : Vial 1
Injection Date  : 8/28/2018 4:21:52 PM
                                           Inj Volume : 1 µl
Acq. Method     : C:\CHEM32\1\METHODS\MH_MG_50_5MIN_70_15_MIN_250_5MIN.M
Last changed    : 7/16/2018 5:12:02 PM by Gray
Analysis Method : C:\CHEM32\1\DATA\JON\JG-02-119-COL.D\JG.M
Last changed    : 2/21/2019 3:48:57 PM by mp
                 (modified after loading)
Method Info     : General Higher BP that correlates to Stambuli Group's GCMS - 30 min

Sample Info     : MORE CONCENTRATED 50 RAMP
=====
```

Additional Info : Peak(s) manually integrated

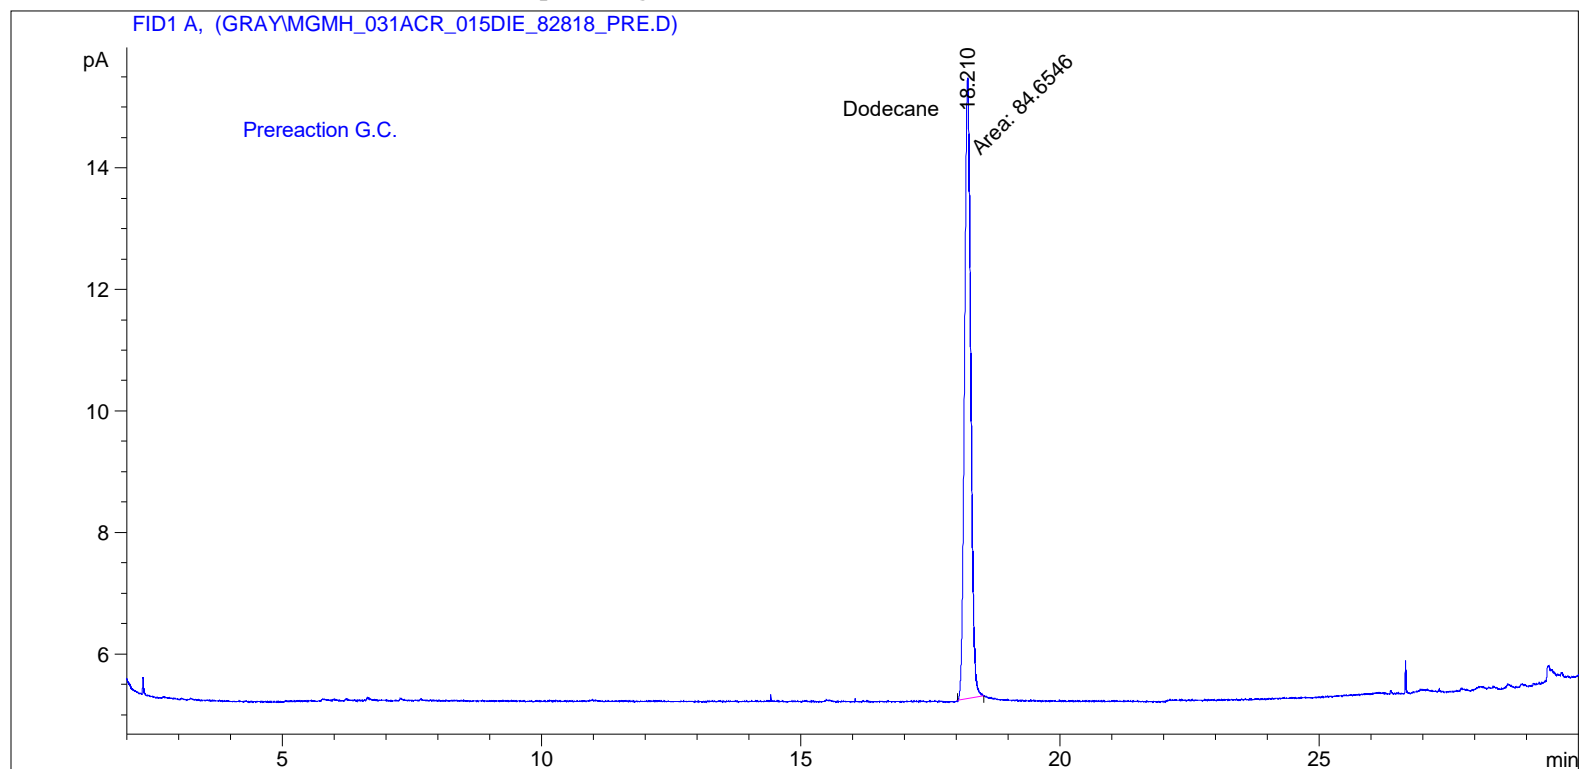

```
=====
                          Area Percent Report
=====
```

```
Sorted By           :      Signal
Multiplier:         :      1.0000
Dilution:           :      1.0000
Use Multiplier & Dilution Factor with ISTDs
```

Sample Name: mgmh\_031acr\_015die\_82818\_pRE

Signal 1: FID1 A,

| Peak # | RetTime [min] | Type | Width [min] | Area [pA*s] | Height [pA] | Area %   |                            |
|--------|---------------|------|-------------|-------------|-------------|----------|----------------------------|
| 1      | 1.182         | VV S | 9.10e-3     | 658.05780   | 1162.90784  | 88.60197 | 2,3-dimethyl-1,3-butadiene |
| 2      | 18.210        | MM   | 0.1382      | 84.65459    | 10.21097    | 11.39803 | Dodecane                   |

Totals : 742.71239 1173.11881

=====  
\*\*\* End of Report \*\*\*

File :D:\MSDChemData\Babu\Gray\8-02-19-CRUDE.D  
Operator : Gray  
Acquired : 6 Aug 2018 16:13 using AcqMethod MGMH\_Method.M  
Instrument : GCMS  
Sample Name: 8-02-18-Crude  
Misc Info :  
Vial Number: 2

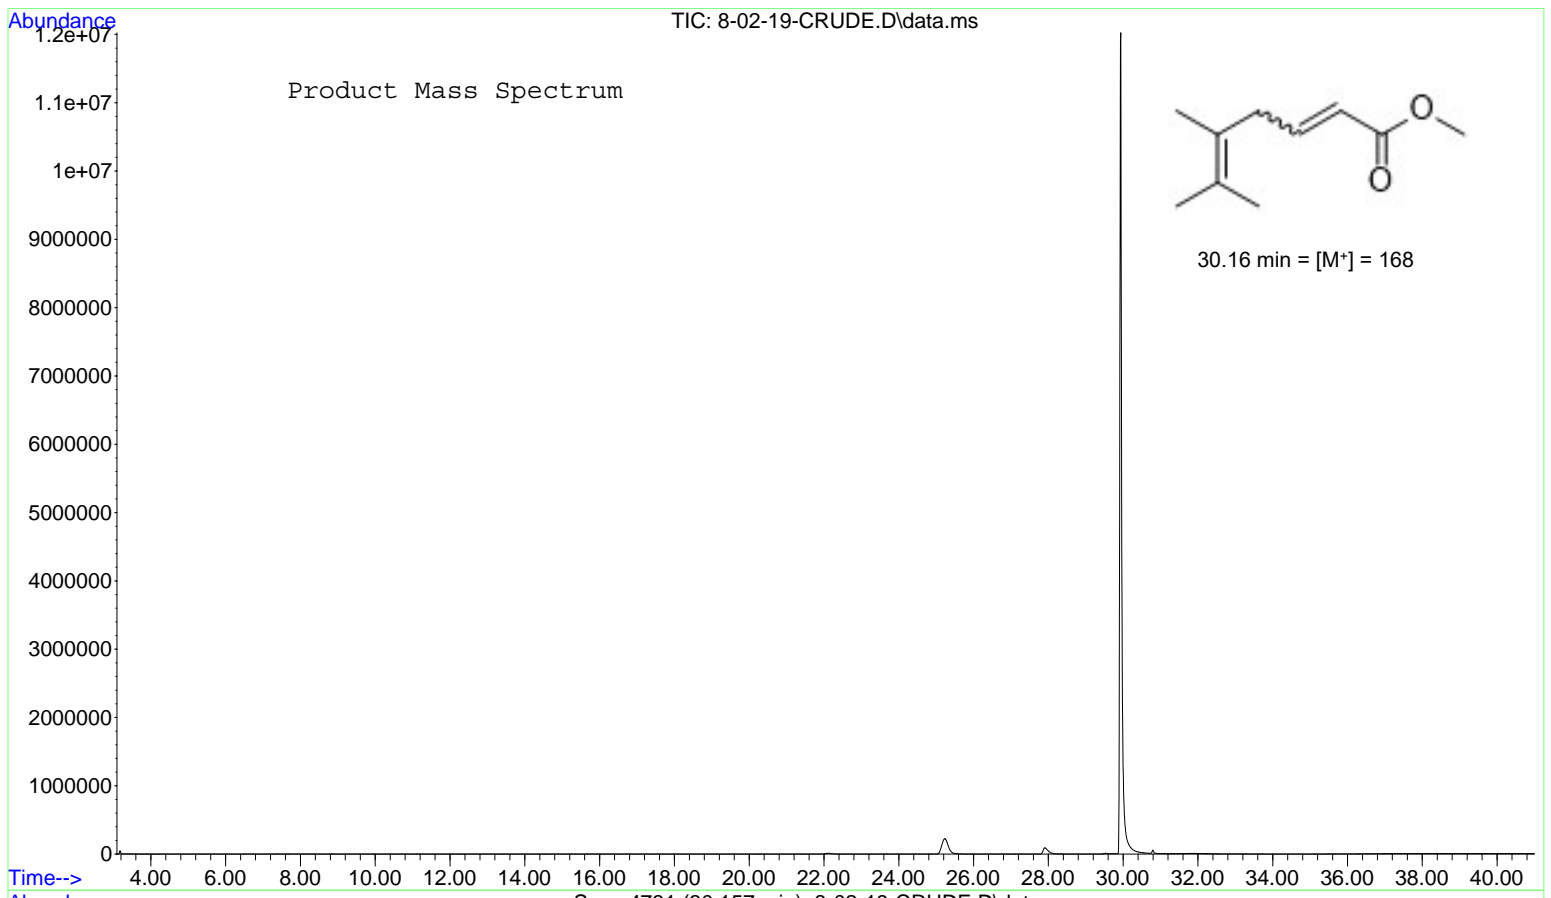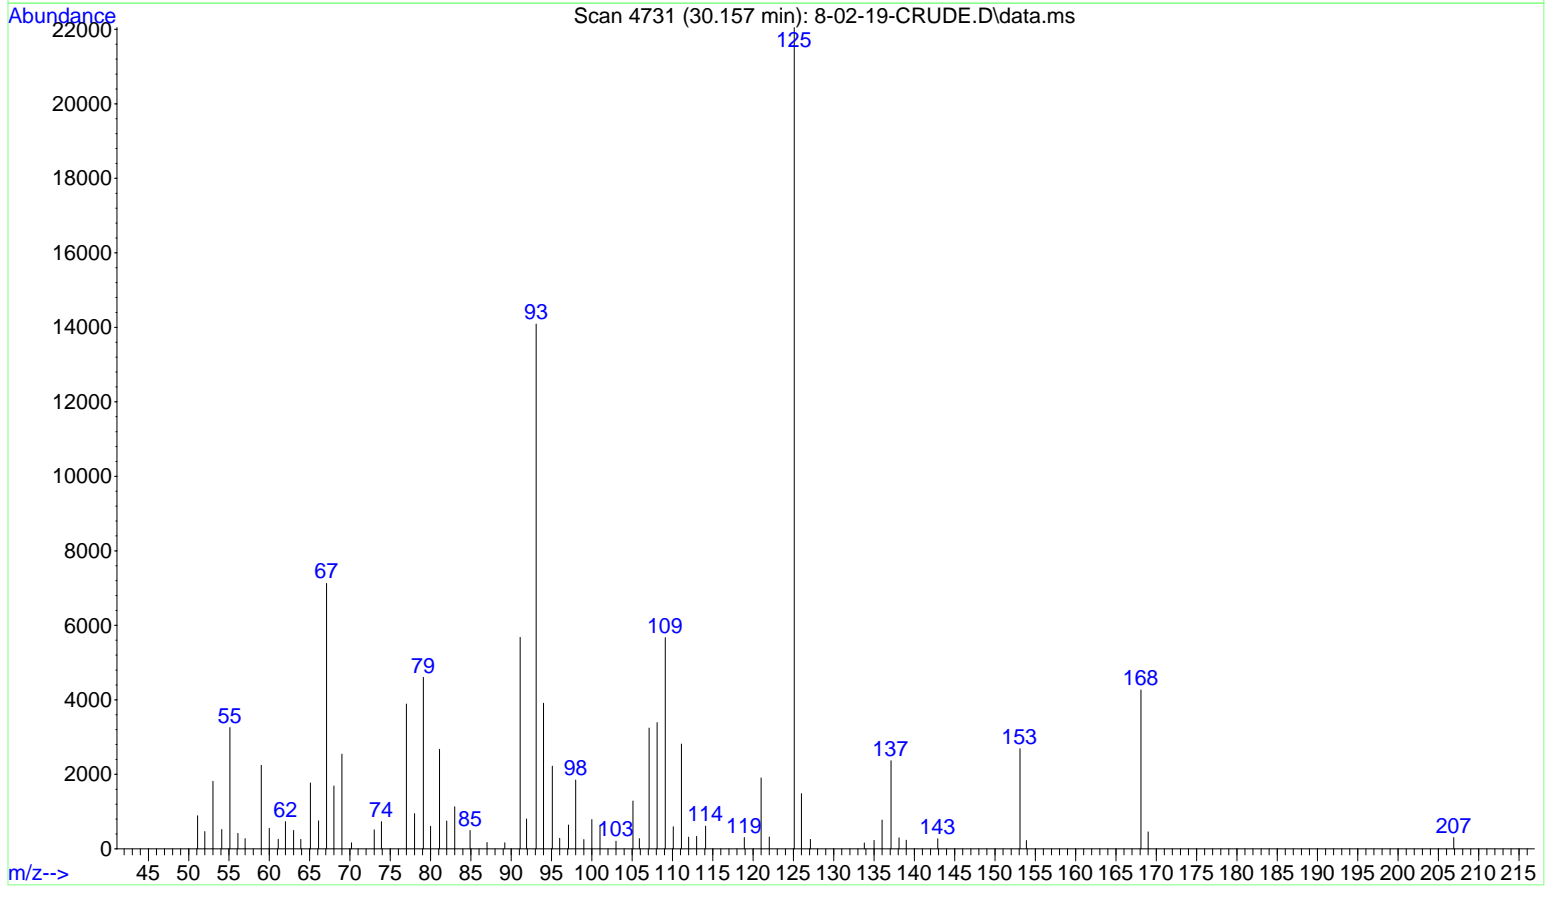

File :D:\MSDCHEMData\Babu\Gray\8-02-19-CRUDE.D  
Operator : Gray  
Acquired : 6 Aug 2018 16:13 using AcqMethod MGMH\_Method.M  
Instrument : GCMS  
Sample Name: 8-02-18-Crude  
Misc Info :  
Vial Number: 2

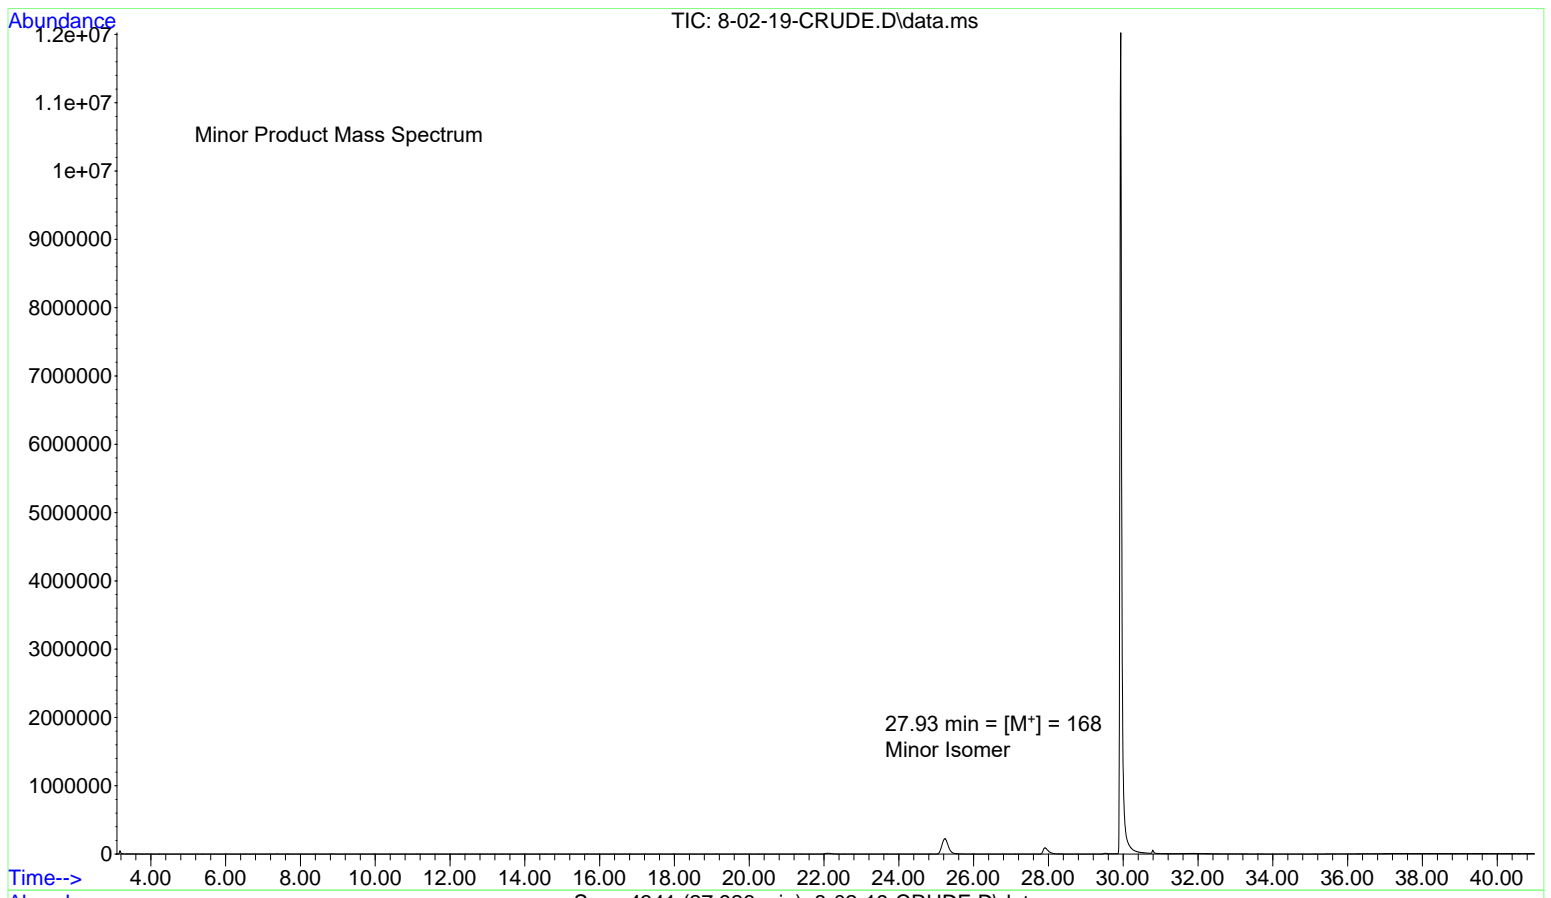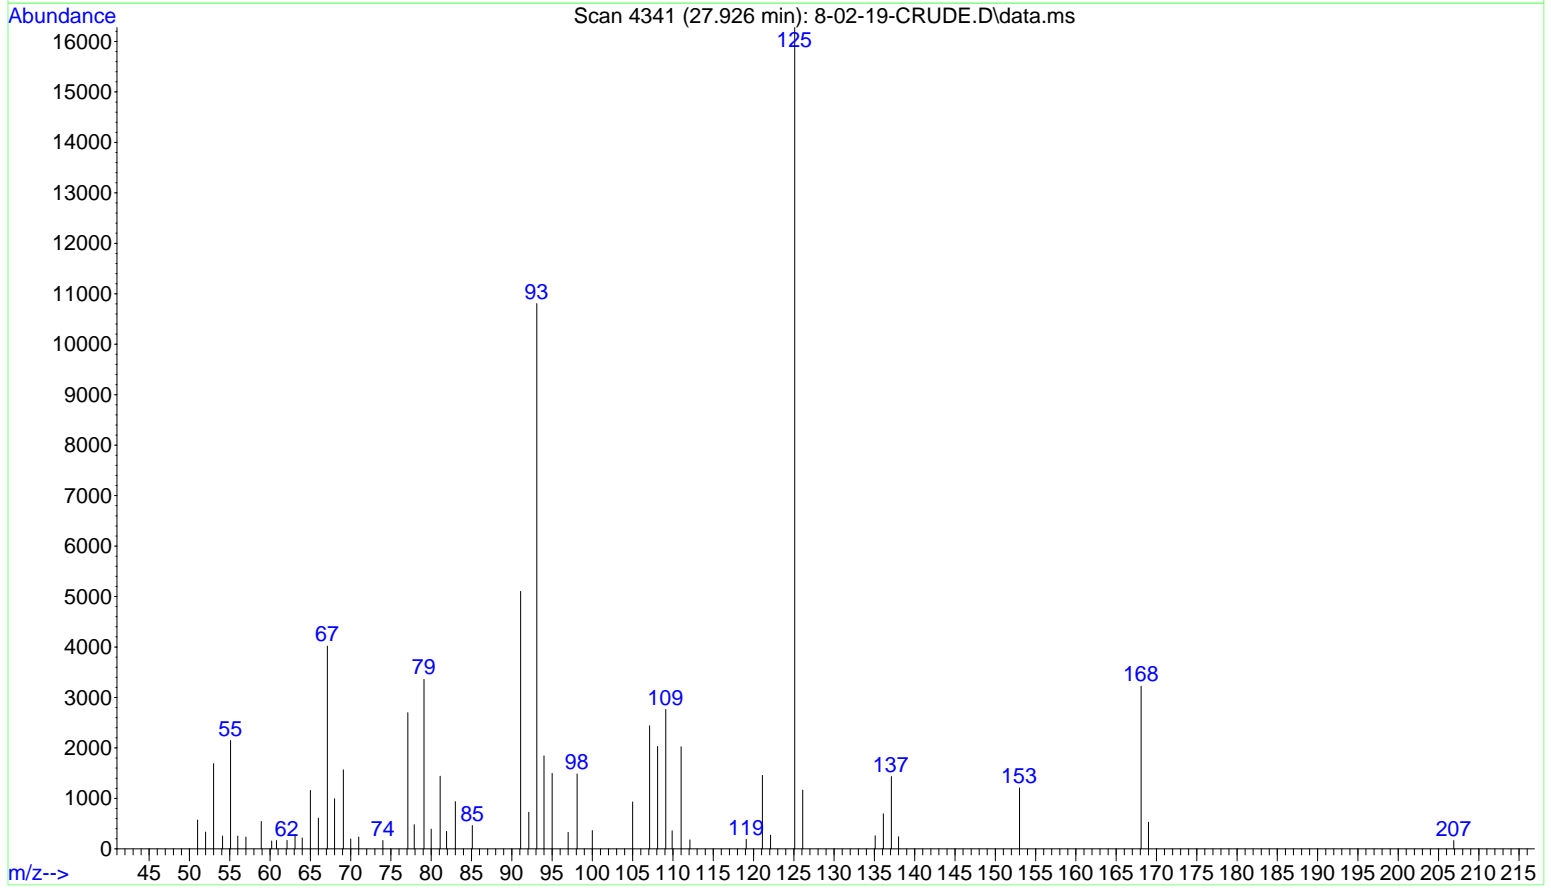

Sample Name: 04-06-19-YES-ZNBR2

```
=====
Acq. Operator   : gRAY
Acq. Instrument : Instrument 1                Location : Vial 11
Injection Date  : 4/6/2019 5:05:01 PM
                                           Inj Volume : 1 µl
Acq. Method     : C:\CHEM32\1\METHODS\MH_MG_50_5MIN_70_15_MIN_250_5MIN.M
Last changed    : 4/6/2019 4:57:56 PM by gRAY
Analysis Method : C:\CHEM32\1\DATA\JON\JG-02-119-COL.D\JG.M
Last changed    : 5/24/2019 4:08:43 PM by MP
                 (modified after loading)
Method Info     : General Higher BP that correlates to Stambuli Group's GCMS - 30 min
=====
```

Additional Info : Peak(s) manually integrated

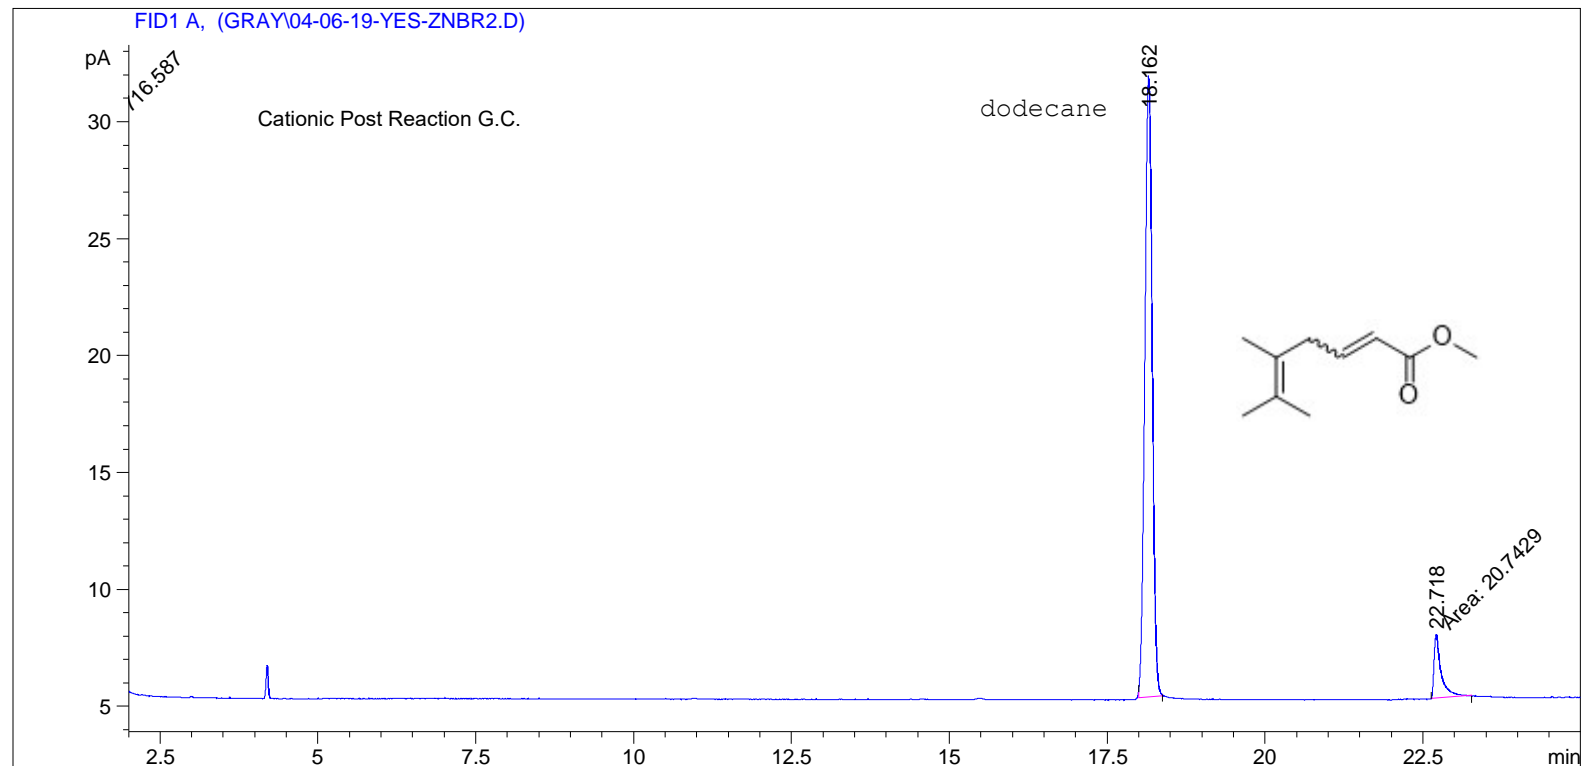

```
=====
                          Area Percent Report
=====
```

```
Sorted By      :      Signal
Multiplier:    :      1.0000
Dilution:      :      1.0000
Sample Amount: :      1.00000 [ng/ul] (not used in calc.)
Use Multiplier & Dilution Factor with ISTDs
```

Signal 1: FID1 A,

Sample Name: 04-06-19-YES-ZNBR2

| Peak # | RetTime [min] | Type | Width [min] | Area [pA*s] | Height [pA] | Area %   |
|--------|---------------|------|-------------|-------------|-------------|----------|
| 1      | 1.182         | MM   | 8.96e-3     | 716.58673   | 1332.75073  | 75.11813 |
| 2      | 18.162        | BB   | 0.1223      | 216.61685   | 26.51304    | 22.70744 |
| 3      | 22.718        | MM   | 0.1270      | 20.74292    | 2.72173     | 2.17443  |

Totals : 953.94650 1361.98551

=====  
\*\*\* End of Report \*\*\*



=====  
Acq. Operator : gRAY  
Acq. Instrument : Instrument 1 Location : Vial 10  
Injection Date : 4/6/2019 4:21:54 PM  
Inj Volume : 1 µl  
Acq. Method : C:\CHEM32\1\METHODS\MH\_MG\_50\_5MIN\_70\_15\_MIN\_250\_5MIN.M  
Last changed : 9/22/2018 5:50:10 PM by MAHESH  
Analysis Method : C:\CHEM32\1\DATA\JON\JG-02-119-COL.D\JG.M  
Last changed : 5/24/2019 4:06:59 PM by MP  
(modified after loading)  
Method Info : General Higher BP that correlates to Stambuli Group's GCMS - 30 min

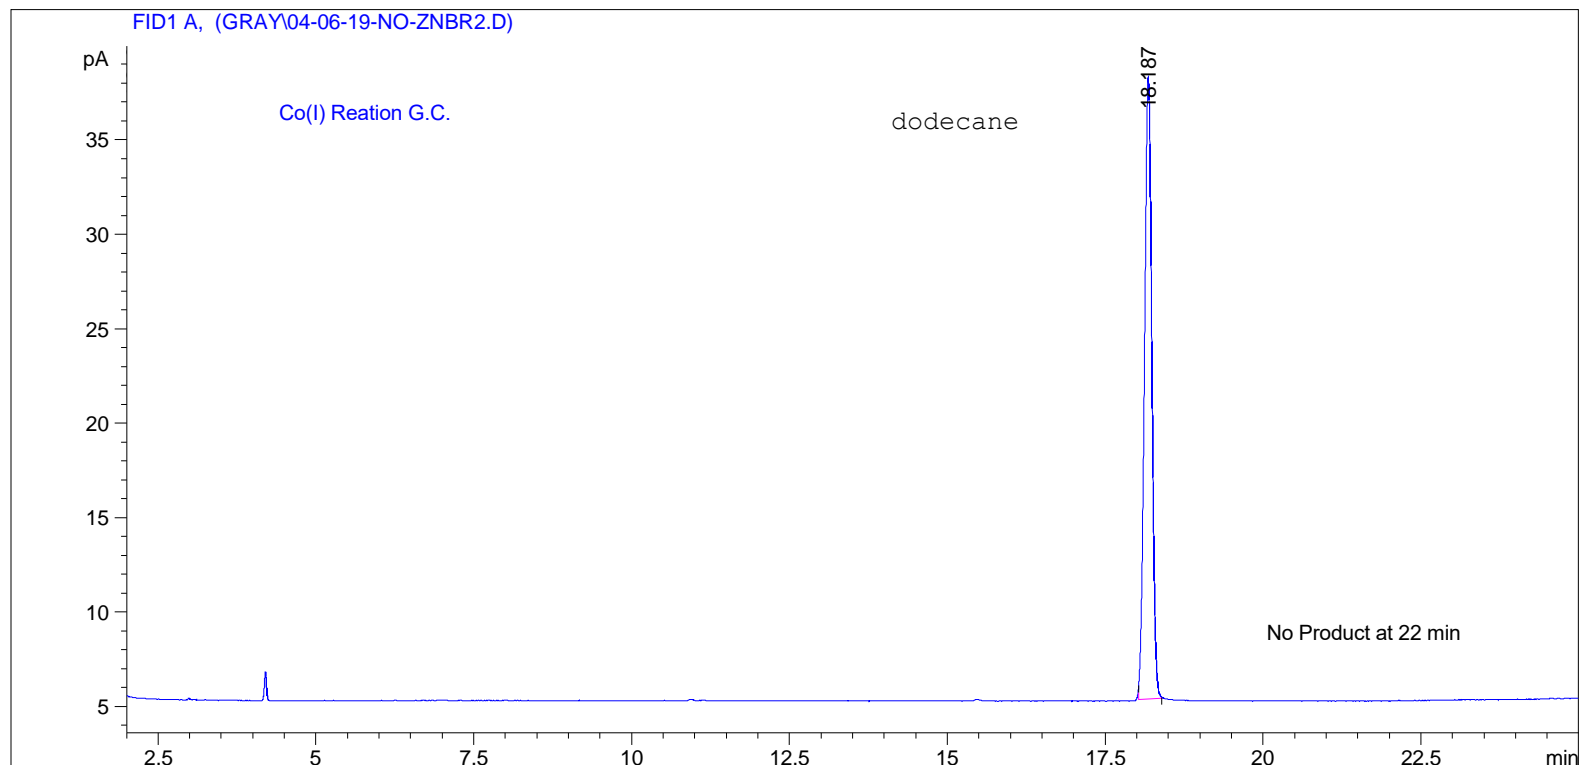

=====  
Area Percent Report  
=====

Sorted By : Signal  
Multiplier: : 1.0000  
Dilution: : 1.0000  
Sample Amount: : 1.00000 [ng/ul] (not used in calc.)  
Use Multiplier & Dilution Factor with ISTDs

Signal 1: FID1 A,

| Peak # | RetTime [min] | Type | Width [min] | Area [pA*s] | Height [pA] | Area %   |
|--------|---------------|------|-------------|-------------|-------------|----------|
| 1      | 1.110         | BV S | 0.0111      | 1.03955e4   | 1.50564e4   | 13.21012 |
| 2      | 1.147         | VV S | 0.0103      | 5.44367e4   | 8.83918e4   | 69.17587 |

Sample Name: 04-06-19-NO-ZNBR2

| Peak # | RetTime [min] | Type | Width [min] | Area [pA*s] | Height [pA] | Area %   |
|--------|---------------|------|-------------|-------------|-------------|----------|
| 3      | 1.185         | PV S | 0.0107      | 971.59753   | 1518.90210  | 1.23467  |
| 4      | 1.218         | PB S | 0.0107      | 1.19648e4   | 1.86206e4   | 15.20436 |
| 5      | 1.326         | BB   | 0.0114      | 550.08496   | 761.88428   | 0.69902  |
| 6      | 1.870         | BB   | 0.0155      | 107.41399   | 109.34675   | 0.13650  |
| 7      | 18.187        | BB   | 0.1221      | 267.13889   | 32.77401    | 0.33947  |

Totals : 7.86932e4 1.24492e5

=====  
\*\*\* End of Report \*\*\*

Sample Name: MG\_02\_35\_CONC\_3M\_POST

=====  
Acq. Operator : GRAY  
Acq. Instrument : Instrument 1 Location : Vial 12  
Injection Date : 6/4/2019 8:53:48 AM  
Inj Volume : 1 µl  
Acq. Method : C:\CHEM32\1\METHODS\MH\_MG\_50\_5MIN\_70\_15\_MIN\_250\_5MIN.M  
Last changed : 9/22/2018 5:50:10 PM by MAHESH  
Analysis Method : C:\CHEM32\1\DATA\JON\JG-02-119-COL.D\JG.M  
Last changed : 9/19/2019 12:47:42 PM by Jon  
(modified after loading)  
Method Info : General Higher BP that correlates to Stambuli Group's GCMS - 30 min

Additional Info : Peak(s) manually integrated

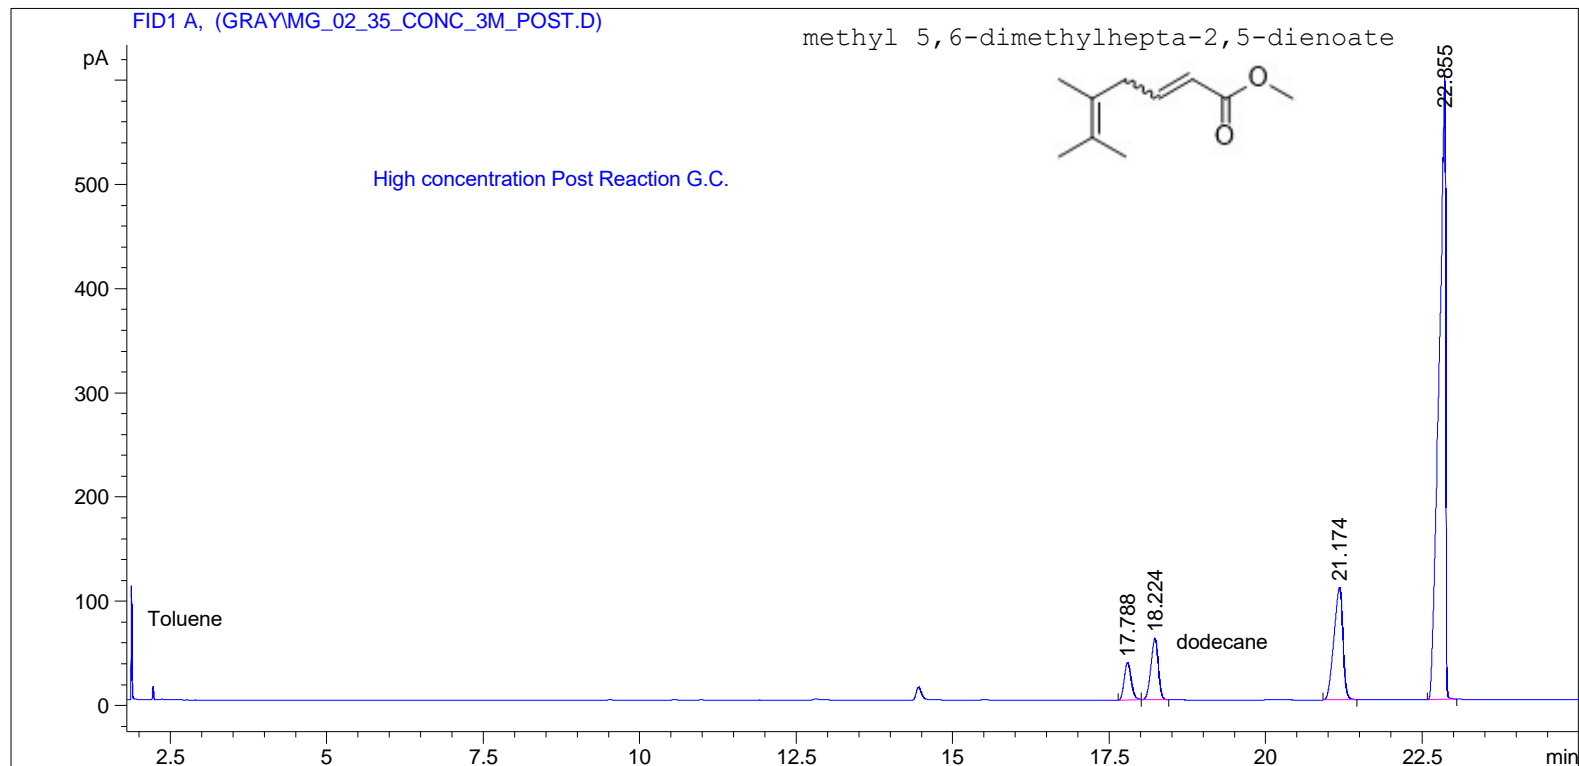

=====  
Area Percent Report  
=====

Sorted By : Signal  
Multiplier: : 1.0000  
Dilution: : 1.0000  
Sample Amount: : 1.00000 [ng/ul] (not used in calc.)  
Use Multiplier & Dilution Factor with ISTDs

Signal 1: FID1 A,

Sample Name: MG\_02\_35\_CONC\_3M\_POST

| Peak # | RetTime [min] | Type | Width [min] | Area [pA*s] | Height [pA] | Area %   |
|--------|---------------|------|-------------|-------------|-------------|----------|
| 1      | 1.182         | VV S | 9.14e-3     | 1.53719e4   | 2.70155e4   | 71.09499 |
| 2      | 17.788        | BV   | 0.0921      | 280.49377   | 36.20875    | 1.29728  |
| 3      | 18.224        | VB   | 0.0972      | 485.05856   | 59.10673    | 2.24339  |
| 4      | 21.174        | BB   | 0.1166      | 1076.78674  | 108.42671   | 4.98012  |
| 5      | 22.855        | BB   | 0.0887      | 4407.41309  | 598.56598   | 20.38422 |

Totals :                                   2.16217e4  2.78178e4

=====  
\*\*\* End of Report \*\*\*

Sample Name: MG-02-035\_BATCH\_CONC\_3M\_PRE

=====

Acq. Operator : MG  
Acq. Instrument : Instrument 1 Location : Vial 11  
Injection Date : 6/3/2019 3:33:01 PM Inj Volume : 1 µl  
Acq. Method : C:\CHEM32\1\METHODS\MH\_MG\_50\_5MIN\_70\_15\_MIN\_250\_5MIN.M  
Last changed : 6/3/2019 3:27:06 PM by ER  
Analysis Method : C:\CHEM32\1\DATA\JON\JG-02-119-COL.D\JG.M  
Last changed : 9/19/2019 12:49:21 PM by Jon  
(modified after loading)  
Method Info : General Higher BP that correlates to Stambuli Group's GCMS - 30 min

Additional Info : Peak(s) manually integrated

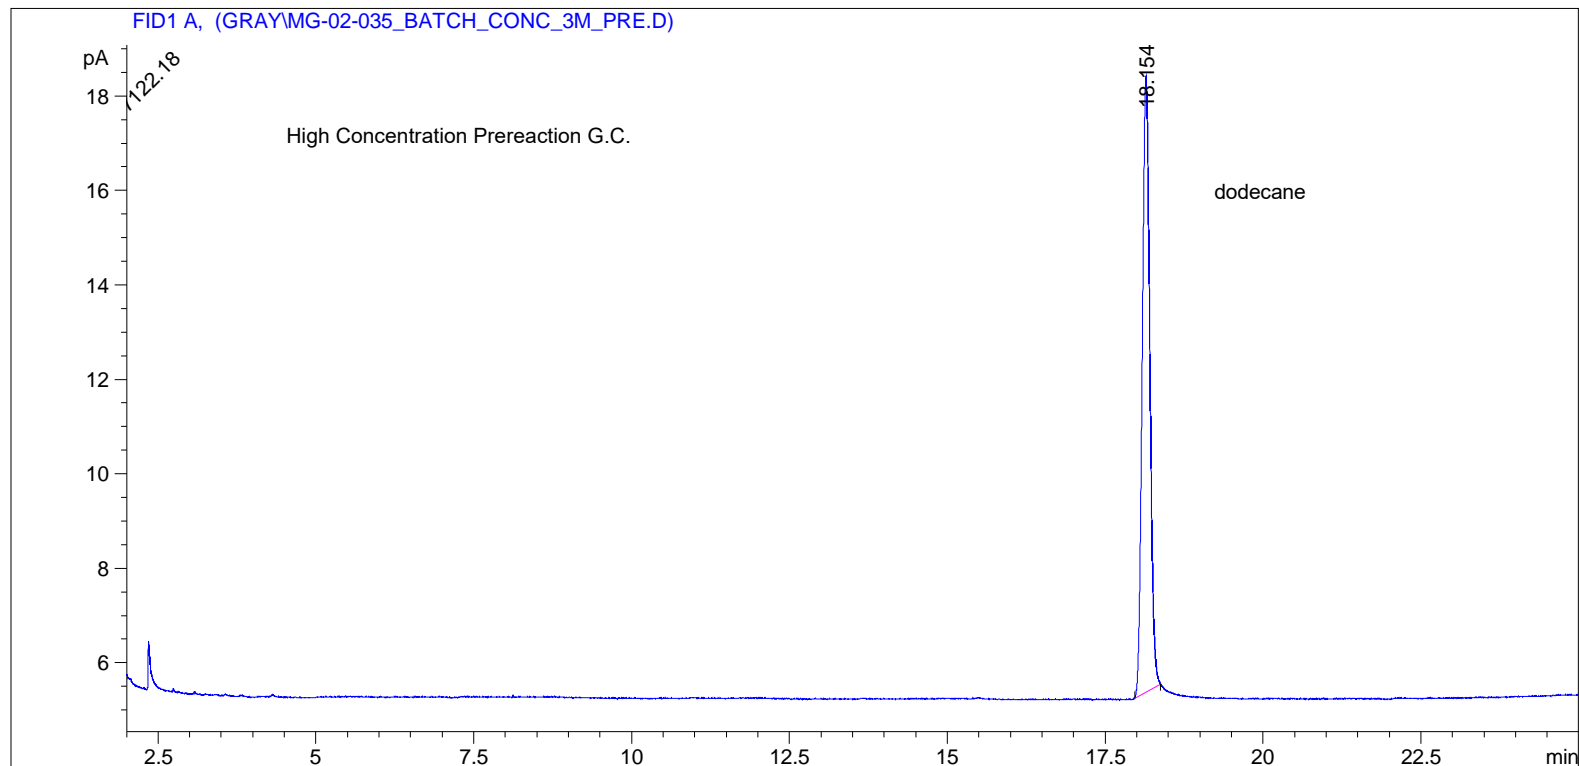

=====

Area Percent Report

=====

Sorted By : Signal  
Multiplier: : 1.0000  
Dilution: : 1.0000  
Sample Amount: : 1.00000 [ng/ul] (not used in calc.)  
Use Multiplier & Dilution Factor with ISTDs

Signal 1: FID1 A,

| Peak # | RetTime [min] | Type | Width [min] | Area [pA*s] | Height [pA] | Area %   |
|--------|---------------|------|-------------|-------------|-------------|----------|
| 1      | 1.179         | MM   | 8.85e-3     | 7122.18066  | 1.34062e4   | 98.49684 |
| 2      | 18.154        | BB   | 0.0982      | 108.69138   | 13.04811    | 1.50316  |

Totals :                               7230.87204 1.34193e4

=====  
\*\*\* End of Report \*\*\*

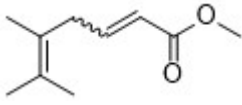

<sup>1</sup>H NMR of pure product

1.665  
1.632

2.902  
2.886

3.712

5.791  
5.787  
5.783  
5.752  
5.748  
5.744

6.936  
6.919  
6.903  
6.897  
6.880  
6.864

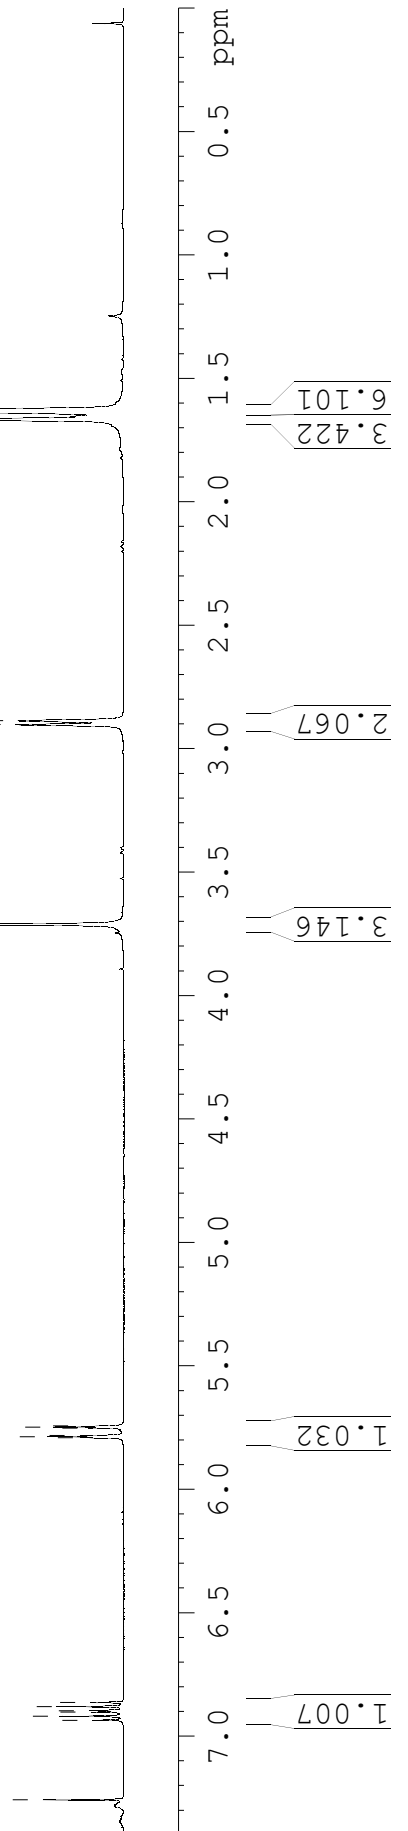

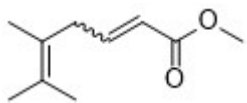

<sup>13</sup>C NMR of pure product

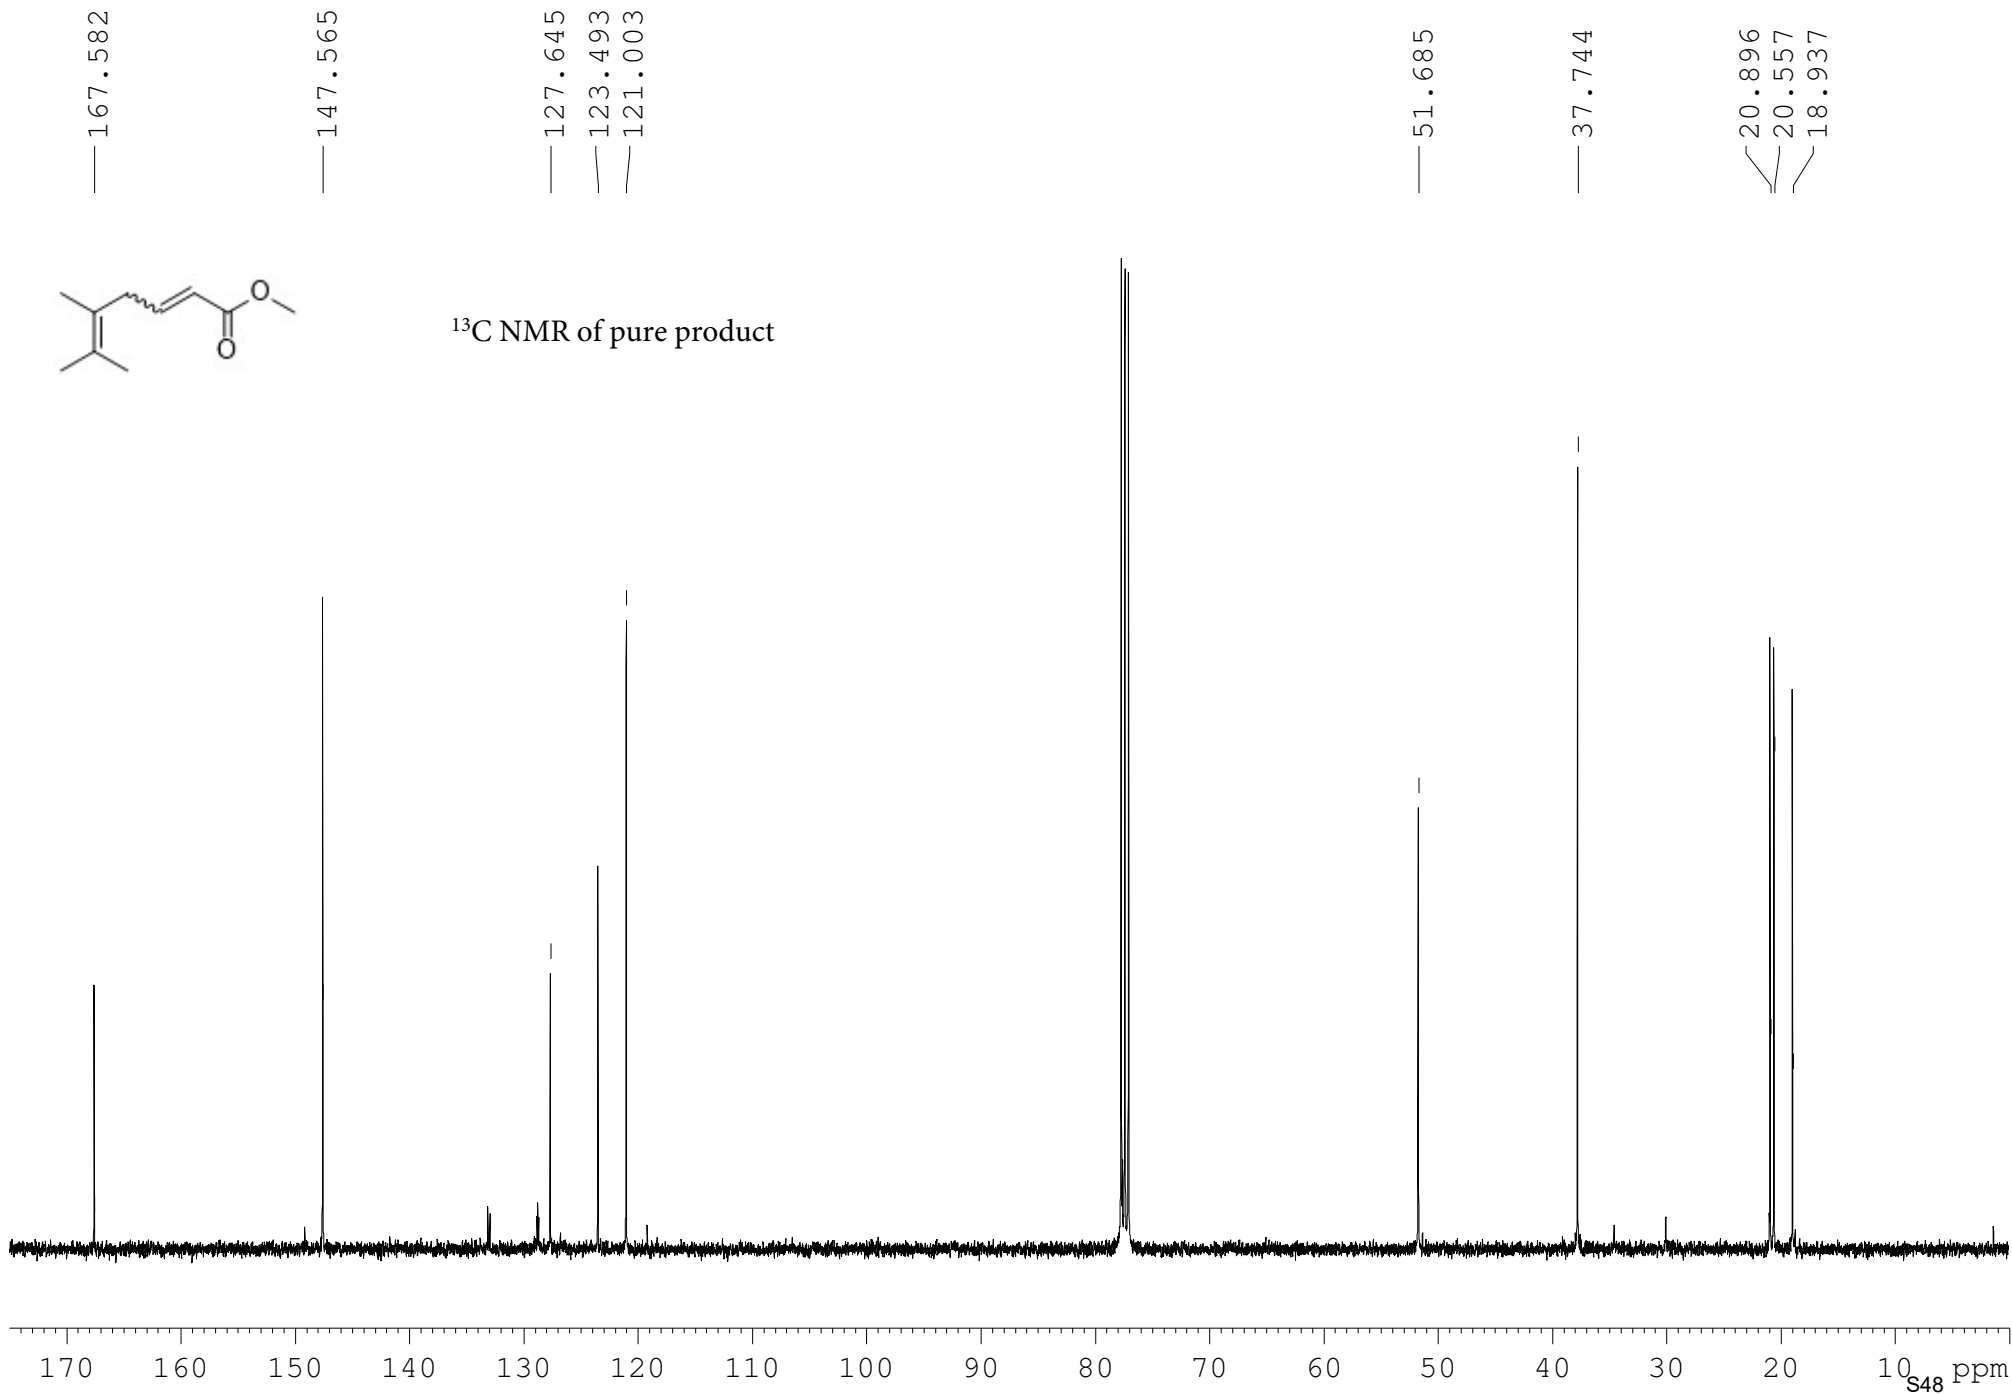



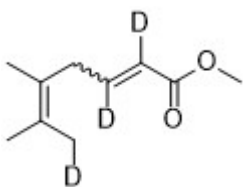

d<sub>3</sub>-product <sup>1</sup>H NMR

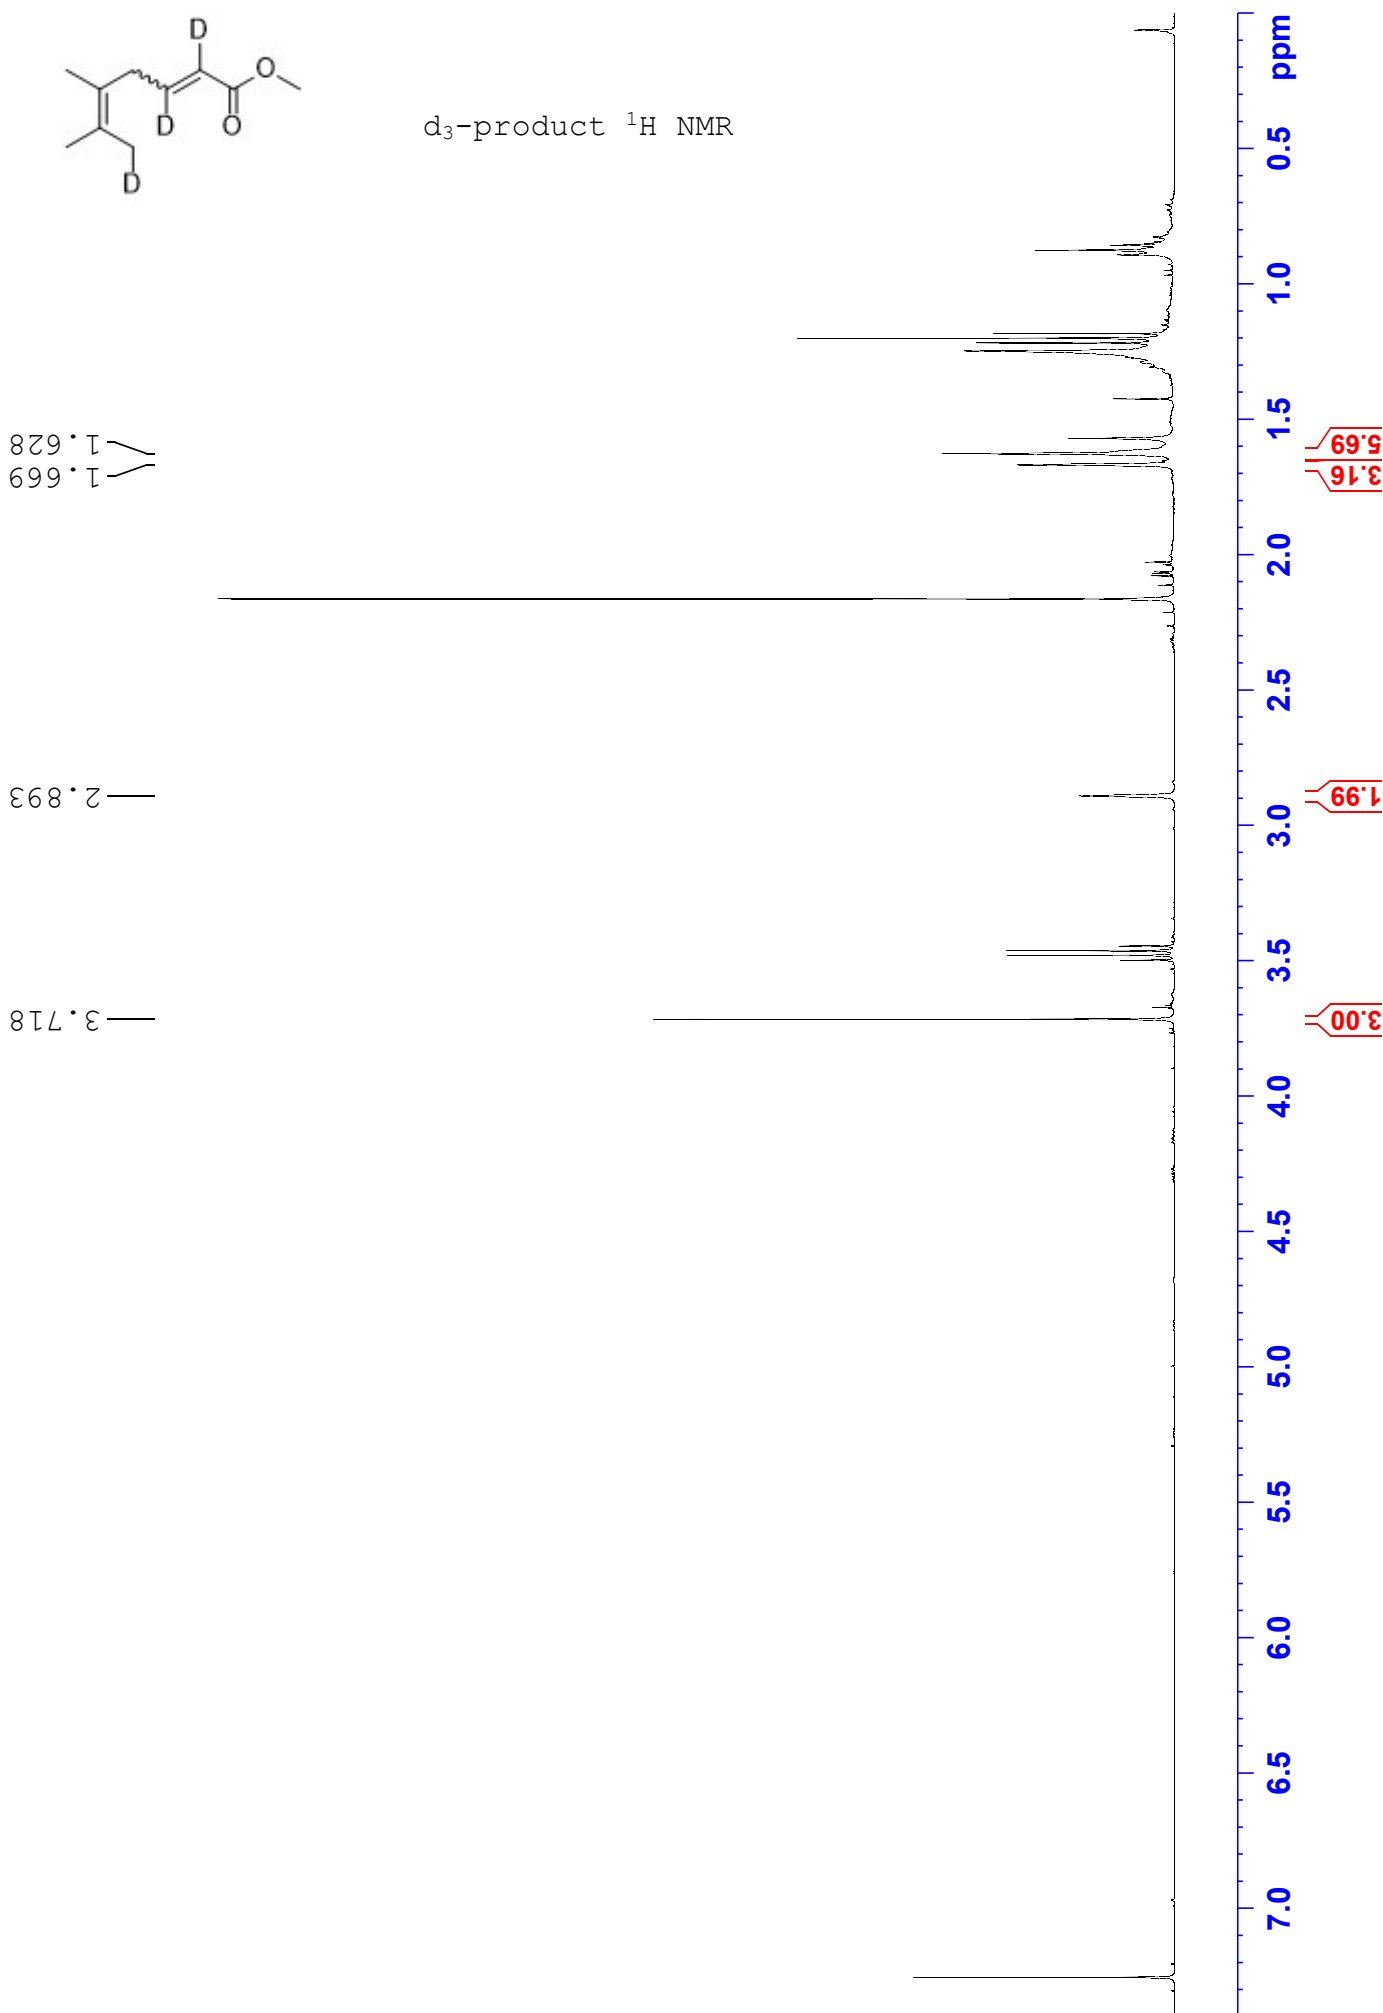

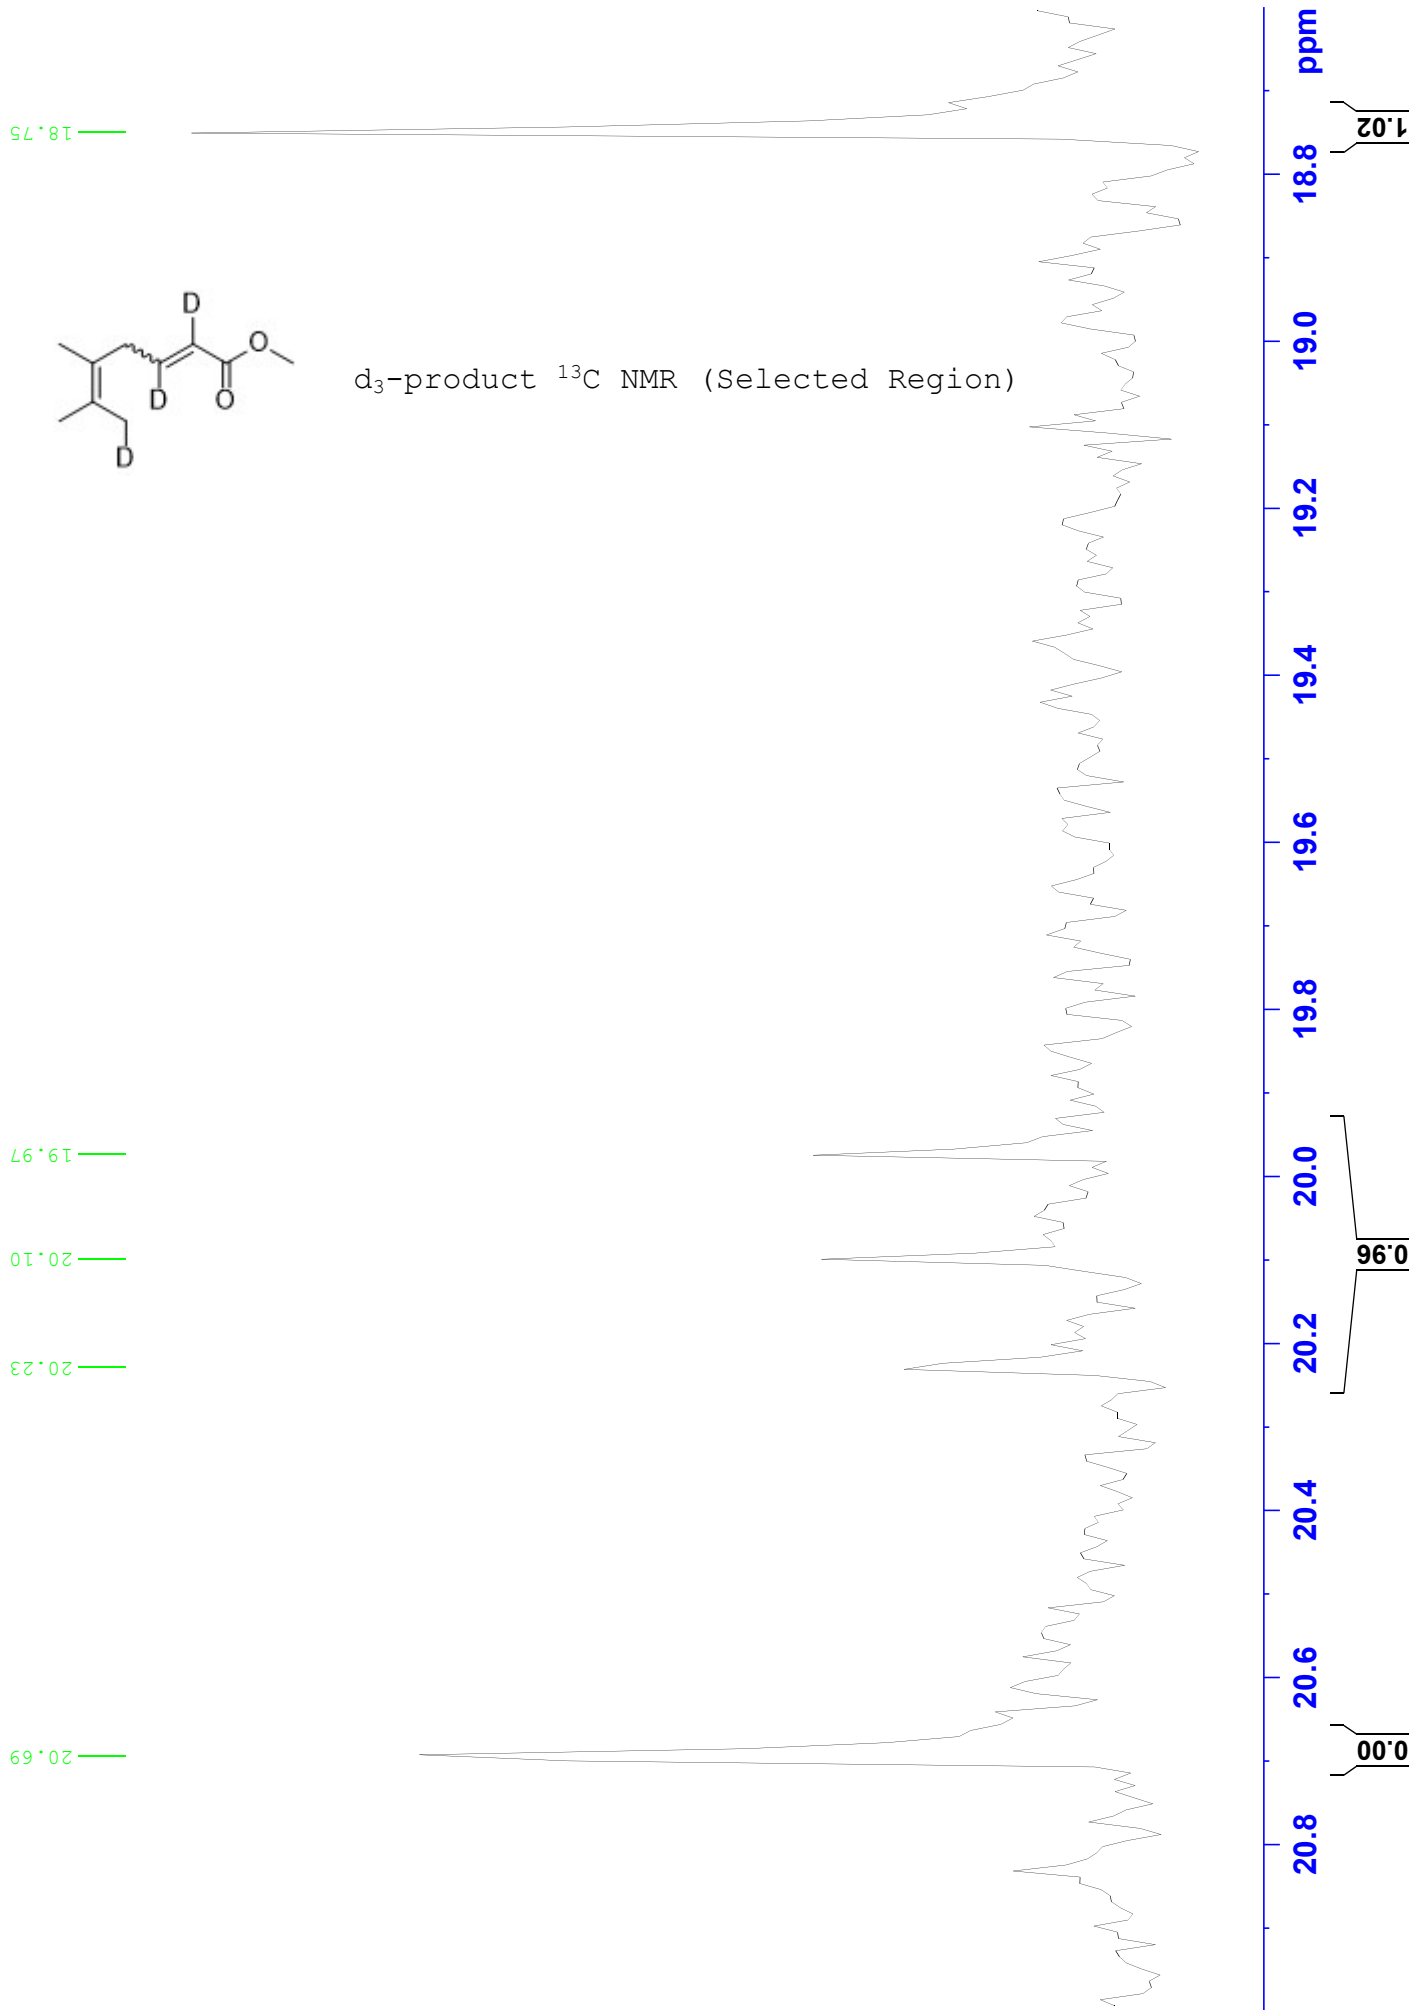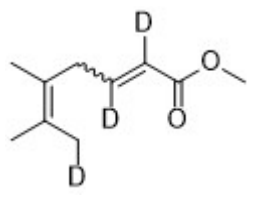

$^{31}\text{P}$  (243 MHz,  $\text{CDCl}_3$ )  
 $\text{Co}(\text{dppp})\text{Br}_2$  (10 mg dissolved in 0.6 mL  $\text{CDCl}_3$  in NMR tube)

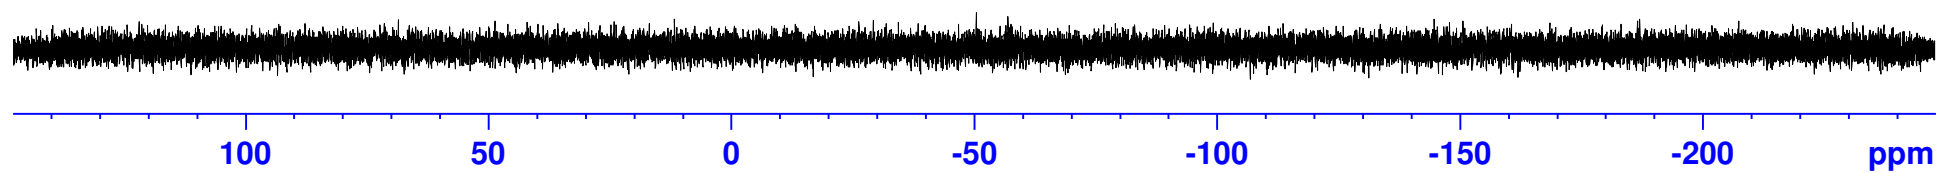

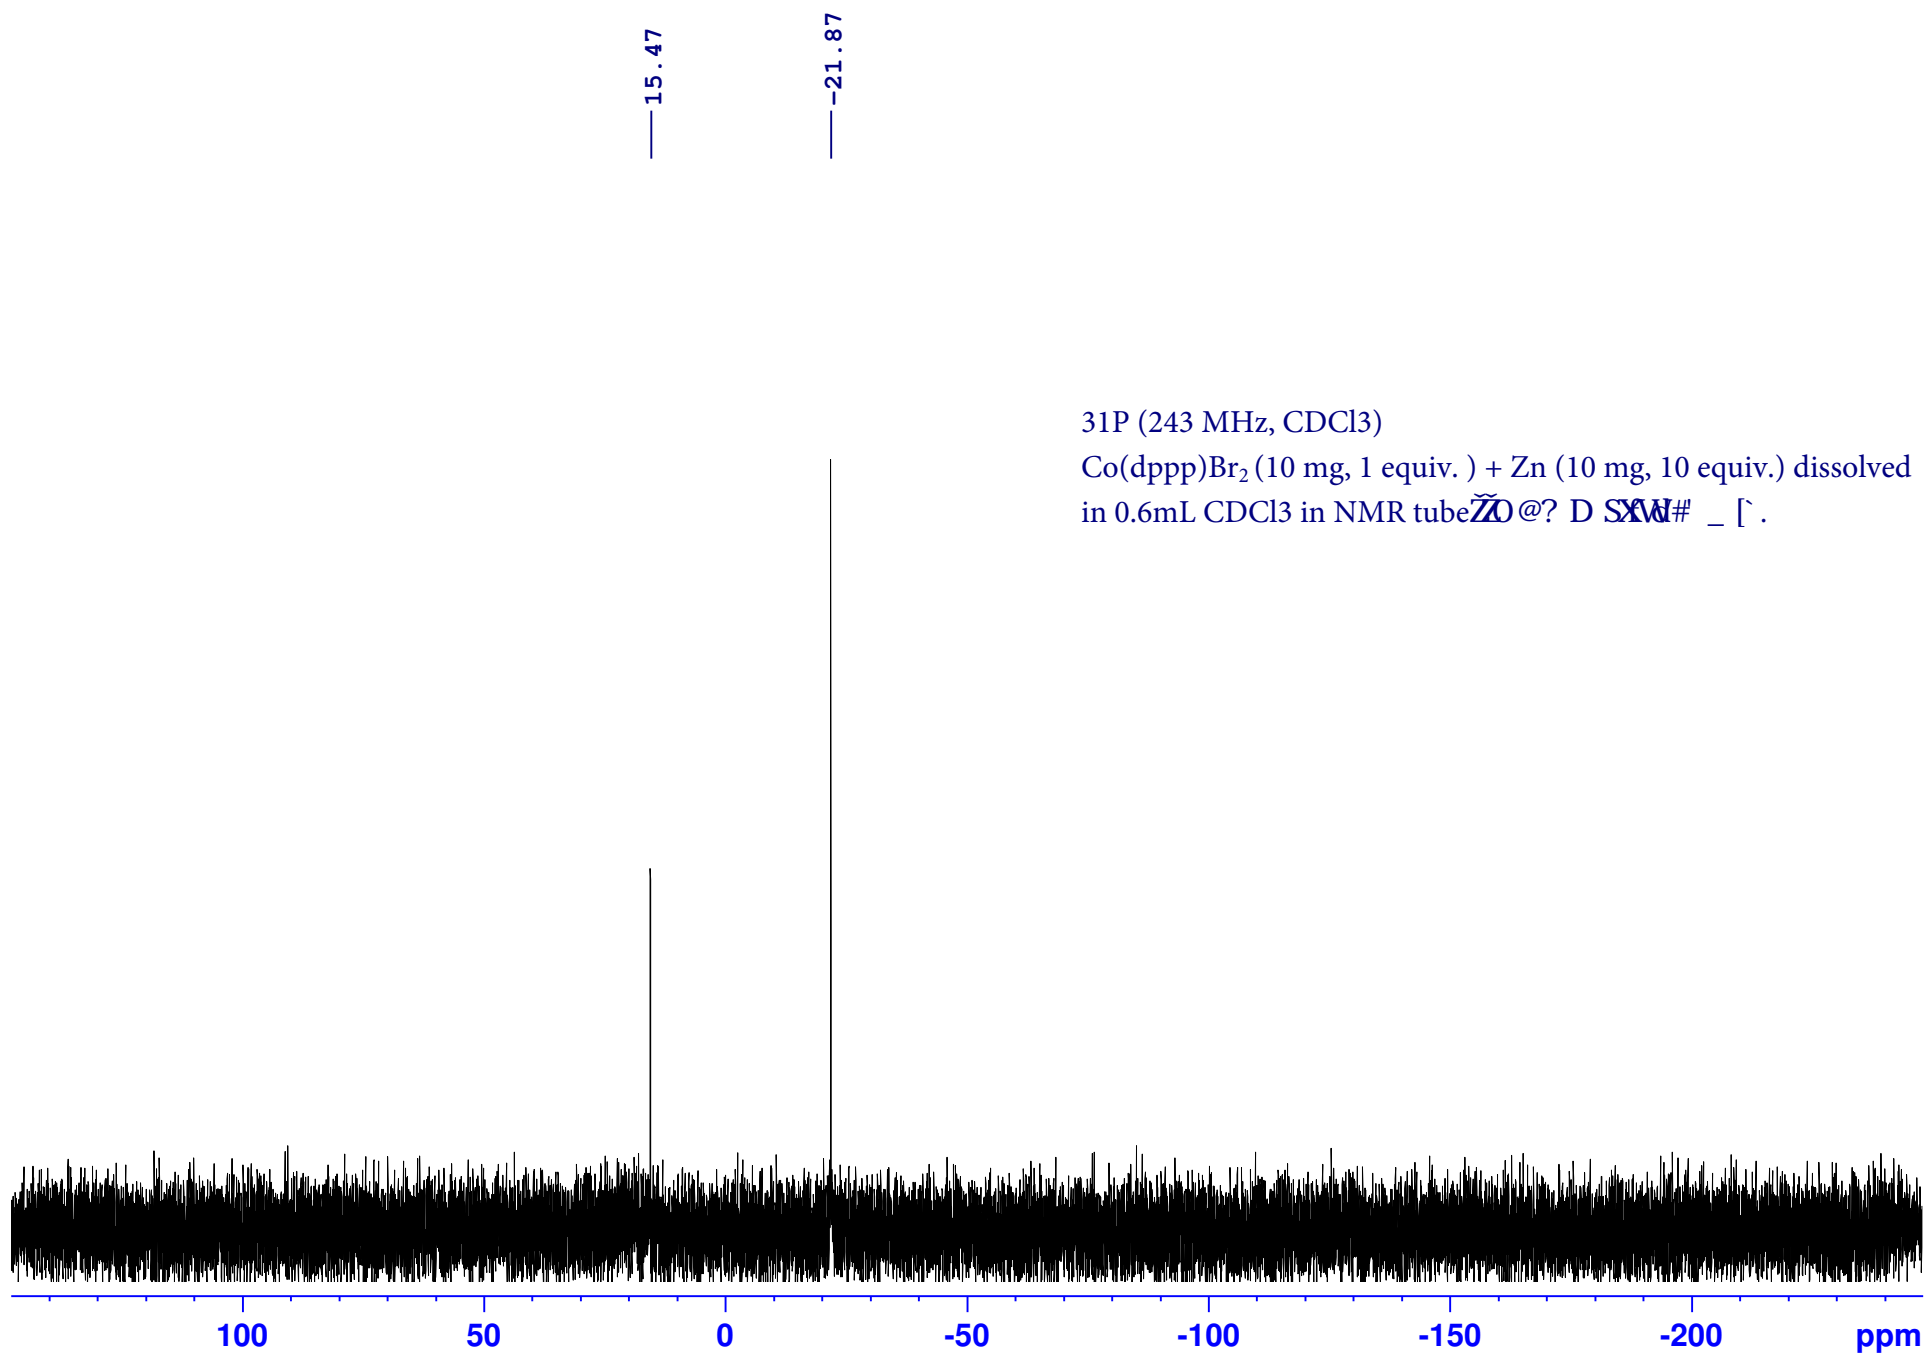

$^{31}\text{P}$  (243 MHz,  $\text{CDCl}_3$ )  
 $\text{Co}(\text{dppp})\text{Br}_2$  (10 mg, 1 equiv. ) + Zn (10 mg, 10 equiv.) dissolved  
in 0.6mL  $\text{CDCl}_3$  in NMR tube  $\tilde{\text{ZO}}@? \text{D SXW}\# \_ [ \cdot$

— -21.89

$^{31}\text{P}$  (243 MHz,  $\text{CDCl}_3$ )  
Co(dppp)Br<sub>2</sub> (10 mg, 1 equiv. ) + Zn (10 mg, 10 equiv.) +  
ZnBr<sub>2</sub> (7mg, 2 equiv.) dissolved in 0.6 mL  $\text{CDCl}_3$  in NMR  
tube.  $^{31}\text{P}$  NMR after 30 min.

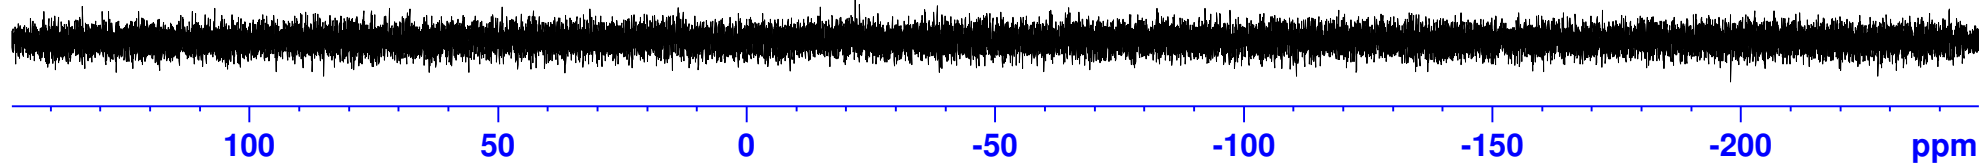

codpppbr2+Zn+NaBARF-dppp-31p

-21.29

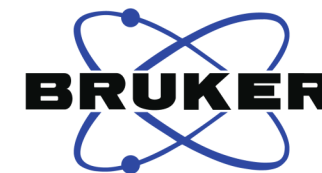

31P (243 MHz, CDCl3)  
Co(dppp)Br2 (10 mg, 1 equiv. ), Zn (10 mg, 10 equiv.),  
and NaBARF (18mg, 2 equiv.) dissolved in 0.6 mL  
CDCl3 in NMR tube. 31P NMR after 30 min.

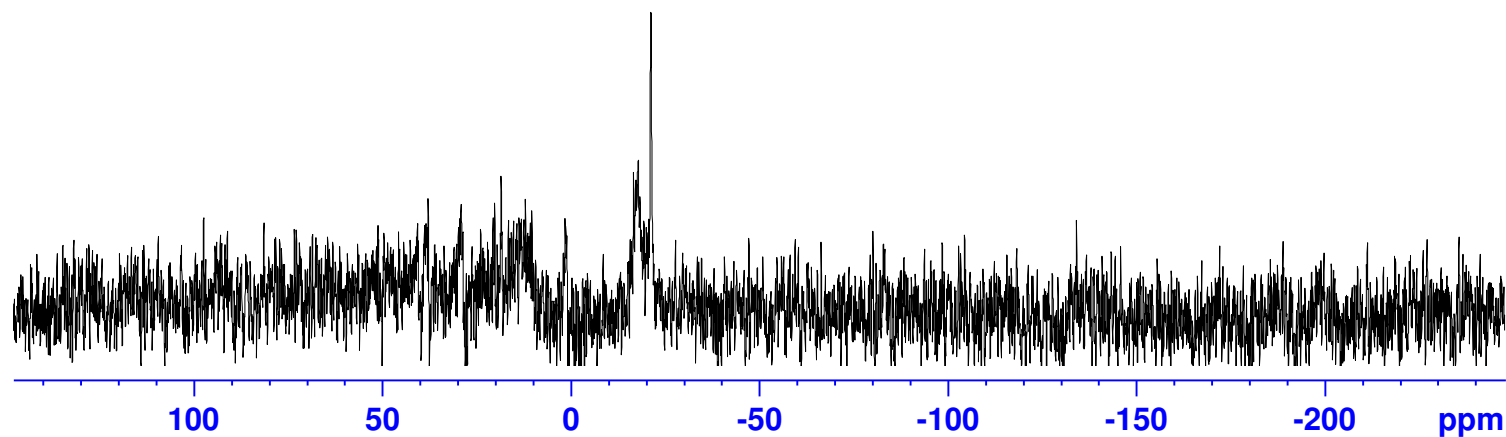

Current Data Parameters  
NAME 6-28-2019  
EXPNO 3  
PROCNO 1

F2 - Acquisition Parameters  
Date\_ 20190628  
Time 17.11 h  
INSTRUM spect  
PROBHD z114607\_0174 (  
PULPROG zg30  
TD 65536  
SOLVENT CDCl3  
NS 512  
DS 4  
SWH 96153.844 Hz  
FIDRES 2.934382 Hz  
AQ 0.3407872 sec  
RG 189.17  
DW 5.200 usec  
DE 6.50 usec  
TE 300.0 K  
D1 2.00000000 sec  
TD0 1  
SFO1 242.9451695 MHz  
NUC1 31P  
P0 4.00 usec  
P1 12.00 usec  
PLW1 33.78099823 W

F2 - Processing parameters  
SI 32768  
SF 242.9573173 MHz  
WDW EM  
SSB 0  
LB 20.00 Hz  
GB 0  
PC 1.40

### 13.1 VTNA Experiments

The graphs below show the VTNA analysis. The overlap of the functions means that the order of that component is equal to the value that is represented on the normalized time axis.<sup>12</sup> The experimental procedure is the exact same as that seen in section 5.1.2 and 5.1.4. The only difference is the data analysis. The x-axis is a normalized time axis that was calculated using the procedure used in the paper of Bures et al.<sup>12</sup>

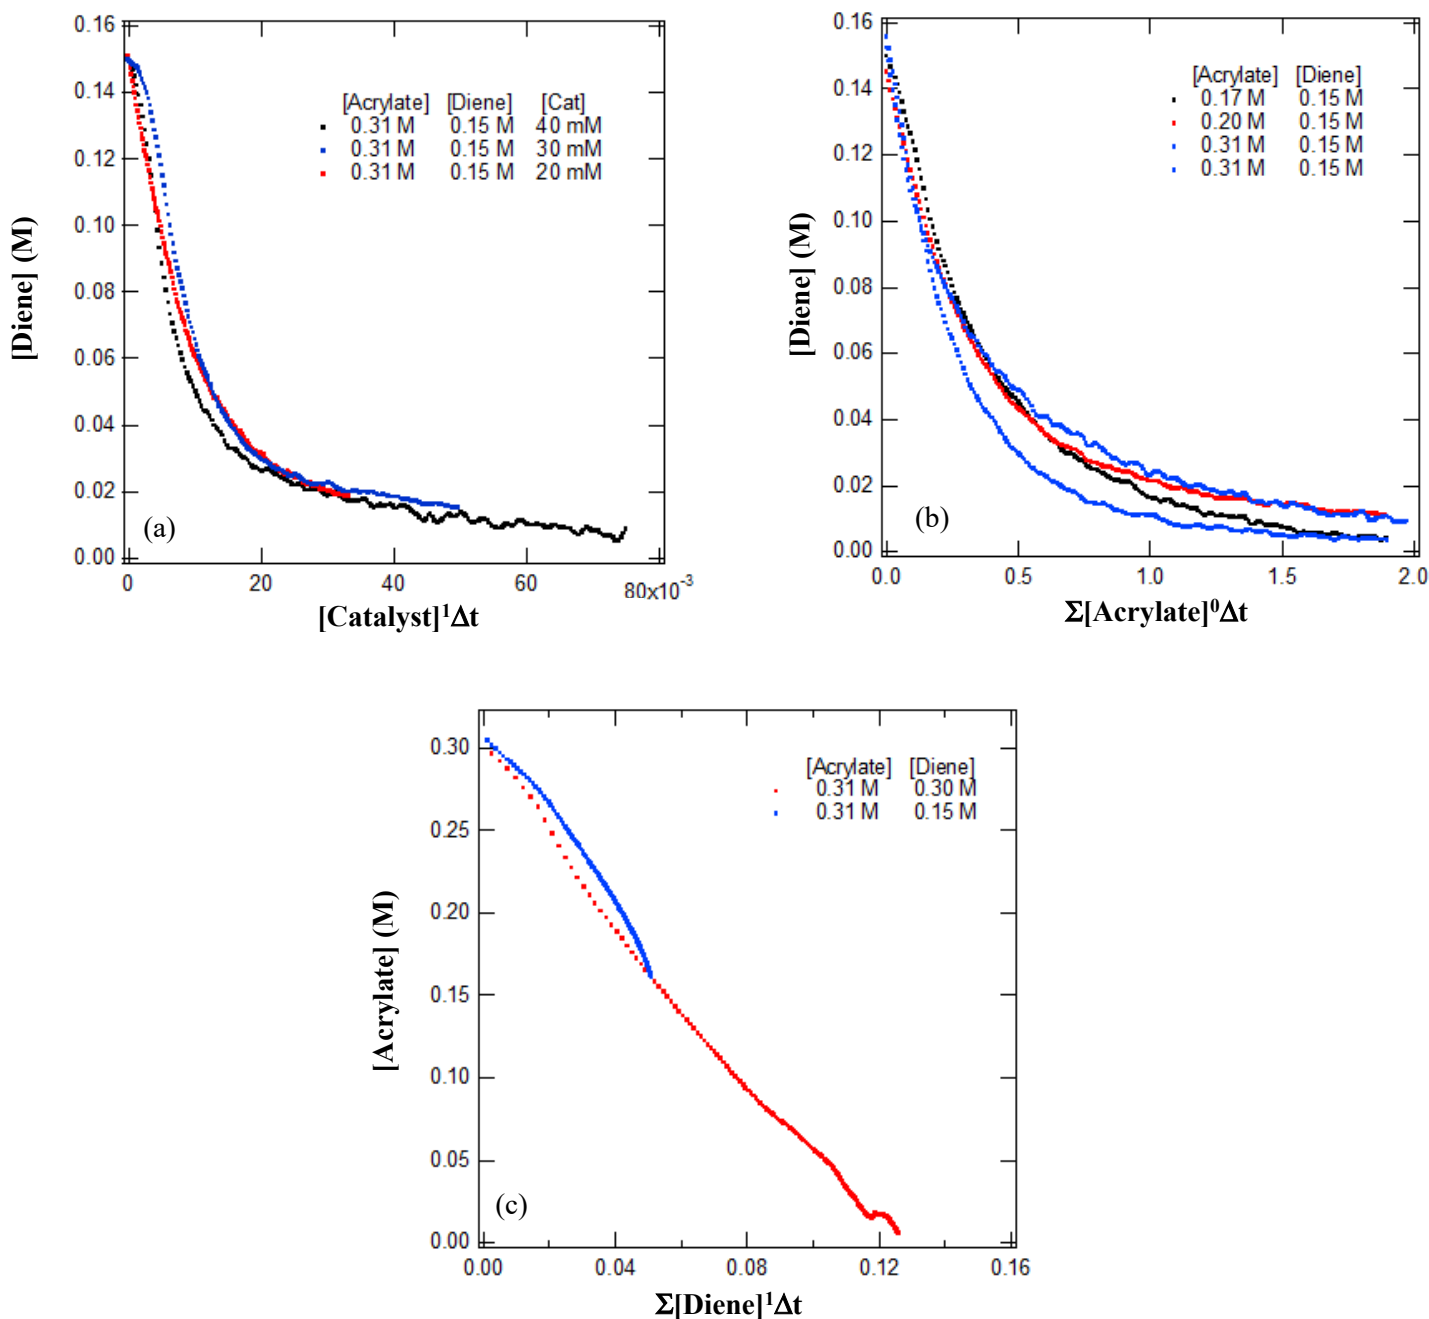

**Figure S19.** (a) The VTNA analysis of the catalyst order. The x-axis is time normalized to the catalyst to the first power. (b) The VTNA analysis of the acrylate order. The x-axis is time normalized to the acrylate to the zeroth power. (c) The VTNA analysis of the diene order. The x-axis is time normalized to the diene to the first power.

### 14.1.1 Model No Free Cobalt

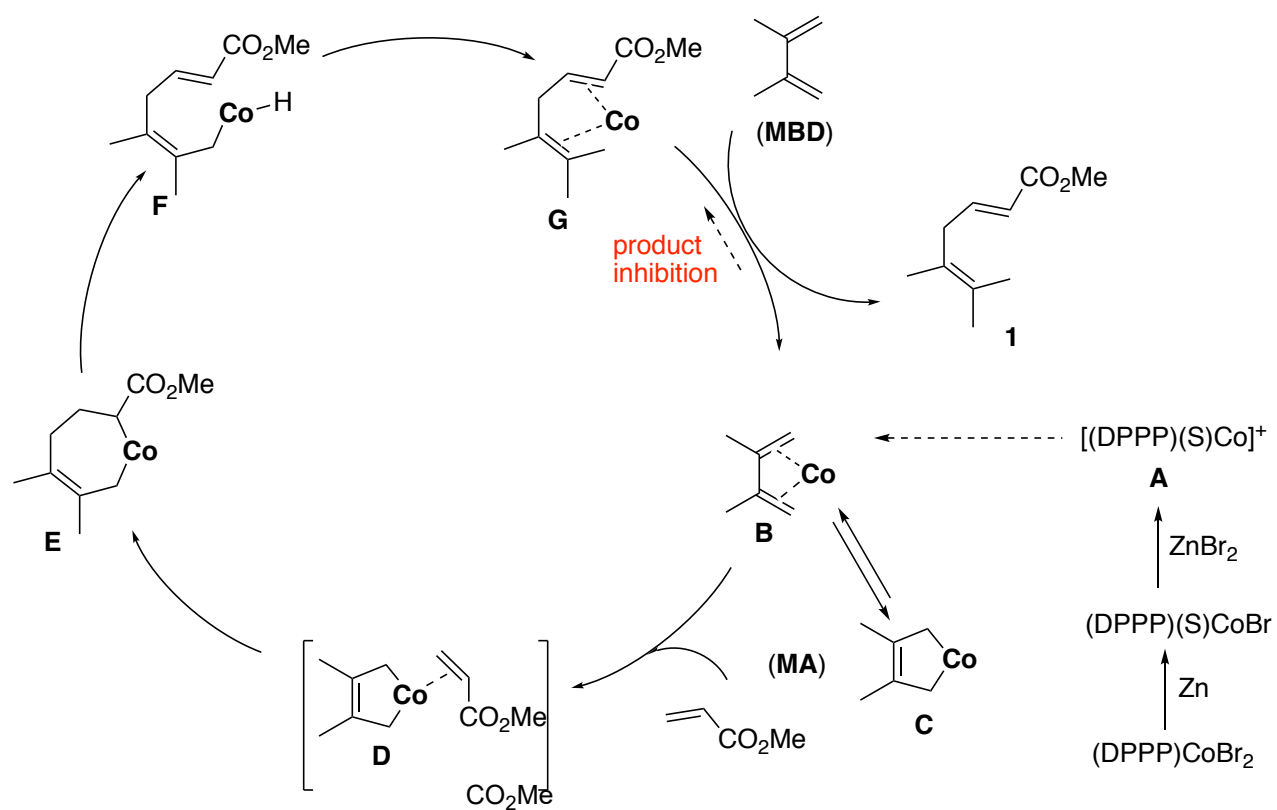

**Figure S20.** Proposed mechanism based off of experimental data without free cobalt. S is a solvent molecule.



### 14.1.1 Model No Free Cobalt(I)+

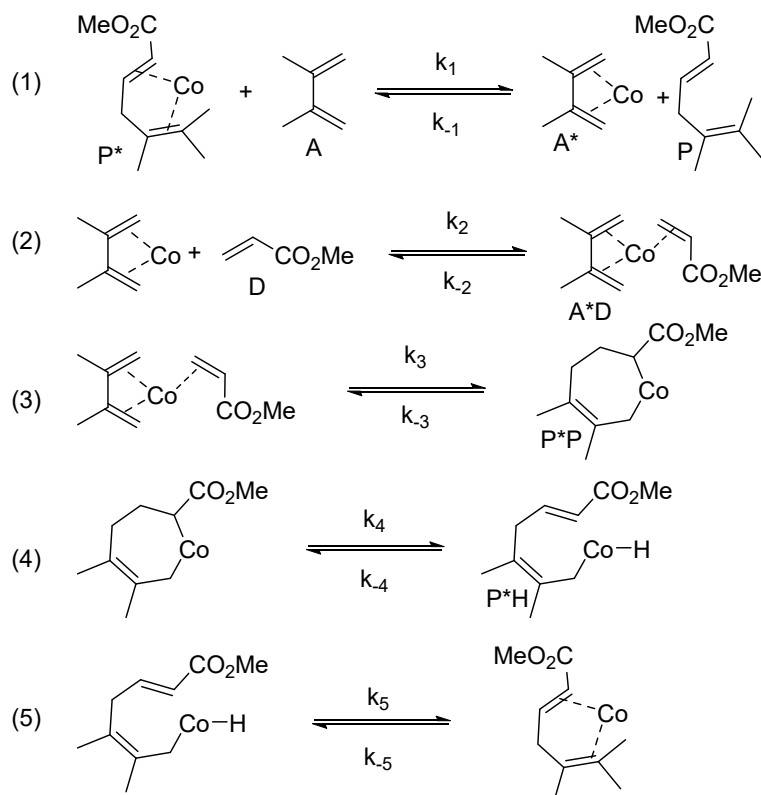

**Reaction 1 is the slow step.**

$$r_1 = k_1[P^*][A] - k_{-1}[A^*][P]$$

$$r_2 = k_2[A^*][D] - k_{-2}[A^*D]$$

$$\frac{r_2}{k_{-2}} = K_2[A^*][D] - [A^*D], \frac{r_2}{k_{-2}} \approx 0$$

$$[A^*] = \frac{[A^*D]}{K_2[D]}$$

$$r_1 = k_1[P^*][A] - k_{-1} \frac{[A^*D][P]}{K_2[D]}$$

$$r_3 = k_3[A^*D] - k_{-3}[P^*P]$$

$$\frac{r_3}{k_{-3}} = K_3[A^*D] - [P^*P], \frac{r_3}{k_{-3}} \approx 0$$

$$[A^*D] = \frac{[P^*P]}{K_3}$$

$$r_1 = k_1[P^*][A] - k_{-1} \frac{[P^*P][P]}{K_2K_3[D]}$$

$$r_4 = k_4[P * P] - k_{-4}[P * H]$$

$$\frac{r_4}{k_{-4}} = K_4[P * P] - [P * H], \frac{r_4}{k_{-4}} \approx 0$$

$$[P * P] = \frac{[P * H]}{K_4}$$

$$r_1 = k_1[P *][A] - k_{-1} \frac{[P * H][P]}{K_2 K_3 K_4 [D]}$$

$$r_5 = k_5[P * H] - k_{-5}[P *]$$

$$\frac{r_5}{k_{-5}} = K_5[P * H] - [P *], \frac{r_5}{k_{-5}} \approx 0$$

$$[P * H] = \frac{[P *]}{K_5}$$

$$r_1 = k_1[P *][A] - k_{-1} \frac{[P *][P]}{K_2 K_3 K_4 K_5 [D]}$$

$$[*]_{total} = [P *] + [A *] + [A * D] + [P * P] + [P * H]$$

$$[*]_{total} = [P *] + \frac{[P *]}{K_2 K_3 K_4 K_5 [D]} + \frac{[P *]}{K_3 K_4 K_5} + \frac{[P *]}{K_4 K_5} + \frac{[P *]}{K_5}$$

$$\frac{[*]_{total}}{1 + \frac{1}{K_2 K_3 K_4 K_5 [D]} + \frac{1}{K_3 K_4 K_5} + \frac{1}{K_4 K_5} + \frac{1}{K_5}} = [P *]$$

$$r_1 = \frac{k_1[*]_{total}[A]}{1 + \frac{1}{K_2 K_3 K_4 K_5 [D]} + \frac{1}{K_3 K_4 K_5} + \frac{1}{K_4 K_5} + \frac{1}{K_5}} - k_{-1} \frac{[P]}{K_2 K_3 K_4 K_5 [D]} \frac{[*]_{total}}{1 + \frac{1}{K_2 K_3 K_4 K_5 [D]} + \frac{1}{K_3 K_4 K_5} + \frac{1}{K_4 K_5} + \frac{1}{K_5}}, K_5 \gg 1$$

$$r_1 = k_1[*]_{total}[A]$$

**At High Concentrations of P**

$$r_1 = k_1[*]_{total}[A] - k_{-1} \frac{[P]}{K_2 K_3 K_4 K_5 [D]} \frac{[*]_{total}}{C}$$

$$C = 1 + \frac{1}{K_2 K_3 K_4 K_5 [D]} + \frac{1}{K_3 K_4 K_5} + \frac{1}{K_4 K_5} + \frac{1}{K_5}$$

**This Suggest that at high concentrations of product, the reaction rate is hampered (through the subtraction of the term  $k_{-1} \frac{[P]}{K_2 K_3 K_4 K_5 [D]} \frac{[*]_{total}}{C}$ ).**

14.1.2 Model Free Cobalt(I)+

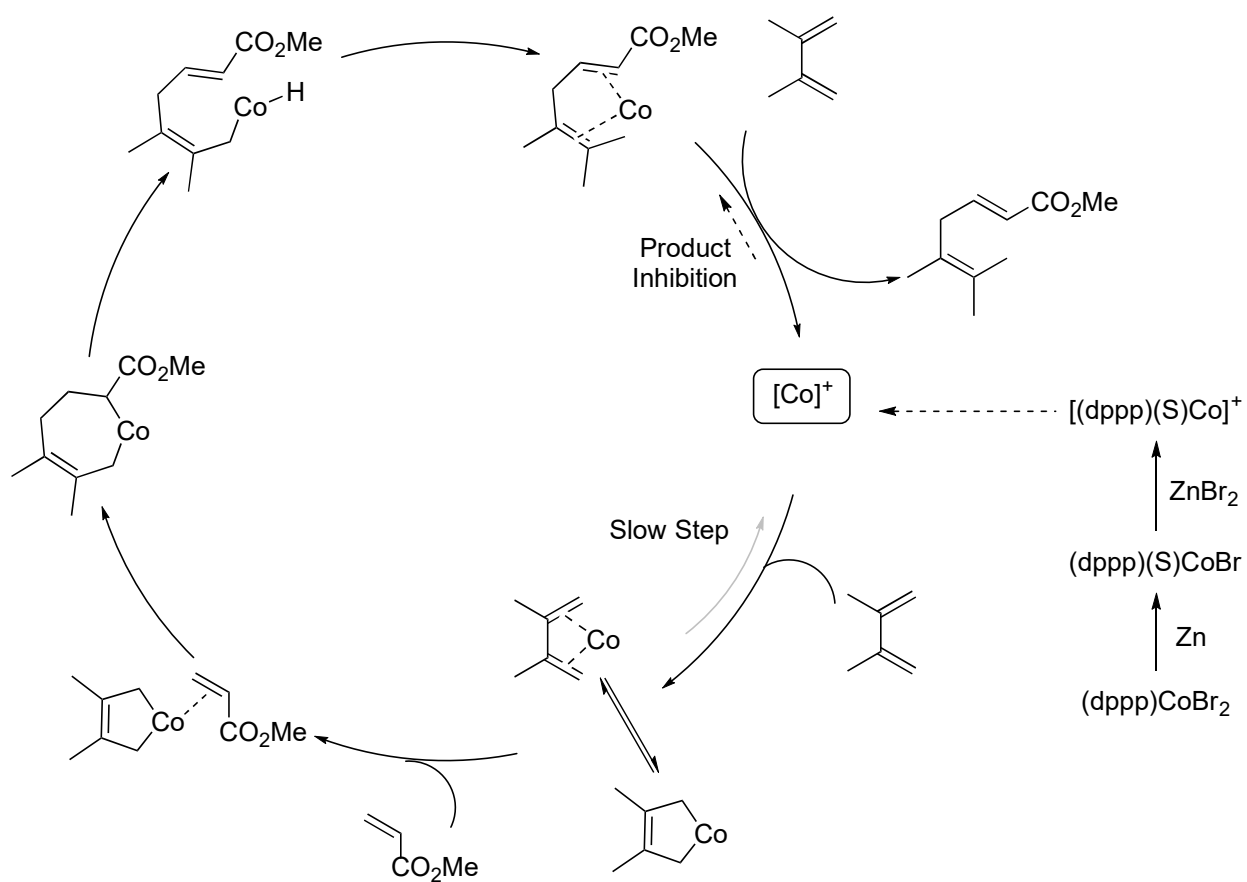

**Figure S21.** Proposed mechanism based off of experimental data including free cobalt. S is a solvent molecule.

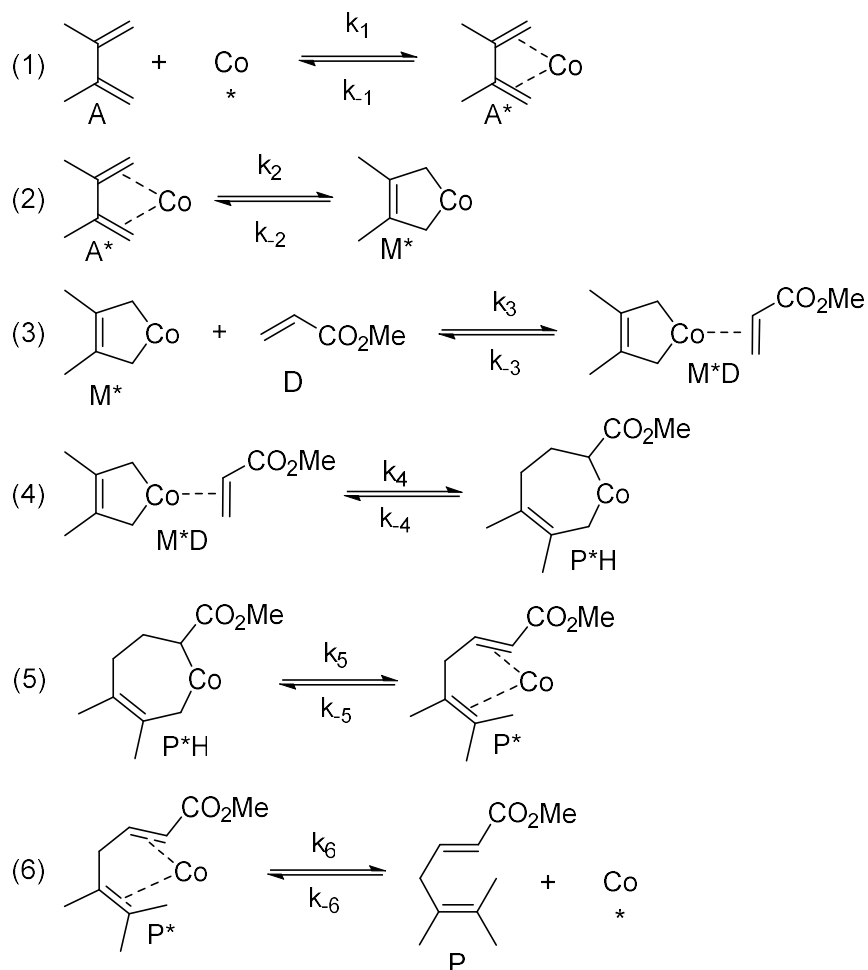

Reaction 1 is the slow step.

$$r_1 = k_1[A][*] - k_{-1}[A^*]$$

$$r_2 = k_2[A^*] - k_{-2}[M^*]$$

$$\frac{r_2}{k_{-2}} = K_2[A^*] - [M^*], \frac{r_2}{k_{-2}} \approx 0$$

$$\frac{[M^*]}{K_2} = [A^*]$$

$$r_1 = k_1[A][*] - \frac{k_{-1}[M^*]}{K_2}$$

$$r_3 = k_3[M^*][D] - k_{-3}[M^*D]$$

$$\frac{r_3}{k_{-3}} = K_3[M^*][D] - [M^*D], \frac{r_3}{k_{-3}} \approx 0$$

$$\frac{[M^*D]}{K_3[D]} = [M^*]$$

$$r_1 = k_1[A][*] - \frac{k_{-1}[M^*D]}{K_2K_3[D]}$$

$$r_4 = k_4[M^*D] - k_{-4}[P^*H]$$

$$\frac{r_4}{k_{-4}} = K_4[M * D] - [P * H], \frac{r_4}{k_{-4}} \approx 0$$

$$\frac{[P * H]}{K_4} = [M * D]$$

$$r_1 = k_1[A][*] - \frac{k_{-1}[P*H]}{K_2K_3K_4[D]}$$

$$r_5 = k_5[P * H] - k_{-5}[P *]$$

$$\frac{r_5}{k_{-5}} = K_5[P * H] - [P *], \frac{r_5}{k_{-5}} \approx 0$$

$$\frac{[P *]}{K_5} = [P * H]$$

$$r_1 = k_1[A][*] - \frac{k_{-1}[P*H]}{K_2K_3K_4K_5[D]}$$

$$r_6 = k_6[P *] - k_{-6}[P][*]$$

$$\frac{r_6}{k_{-6}} = K_6[P *] - [P][*], \frac{r_6}{k_{-6}} \approx 0$$

$$\frac{[P][*]}{K_6} = [P *]$$

$$r_1 = k_1[A][*] - \frac{k_{-1}[P][*]}{K_2K_3K_4K_5K_6[D]}$$

$$[*]_{total} = [*] + [A *] + [M *] + [M * D] + [P * H] + [P *]$$

$$[*]_{total} = [*] + \frac{[P][*]}{K_2K_3K_4K_5K_6[D]} + \frac{[P][*]}{K_3K_4K_5K_6[D]} + \frac{[P][*]}{K_4K_5K_6} + \frac{[P][*]}{K_5K_6} + \frac{[P][*]}{K_6}$$

$$r_1 = k_1[A] \frac{[*]_{total}}{1 + \frac{[P]}{K_2K_3K_4K_5K_6[D]} + \frac{[P]}{K_3K_4K_5K_6[D]} + \frac{[P]}{K_4K_5K_6} + \frac{[P]}{K_5K_6} + \frac{[P]}{K_6}} - \frac{k_{-1}[P][*]}{K_2K_3K_4K_5K_6[D]} \frac{[*]_{total}}{1 + \frac{[P]}{K_2K_3K_4K_5K_6[D]} + \frac{[P]}{K_3K_4K_5K_6[D]} + \frac{[P]}{K_4K_5K_6} + \frac{[P]}{K_5K_6} + \frac{[P]}{K_6}}$$

$$r_1 = \left( k_1[A] - \frac{k_{-1}[P]}{K_2K_3K_4K_5K_6[D]} \right) \left( \frac{[*]_{total}}{1 + \frac{[P]}{K_2K_3K_4K_5K_6[D]} + \frac{[P]}{K_3K_4K_5K_6[D]} + \frac{[P]}{K_4K_5K_6} + \frac{[P]}{K_5K_6} + \frac{[P]}{K_6}} \right)$$

$$r_1 = \left( k_1[A] - \frac{k_{-1}[P]}{K_2K_3K_4K_5K_6[D]} \right) \left( \frac{[*]_{total}}{1 + \frac{[P]}{K_2K_3K_4K_5K_6[D]} + \frac{[P]}{K_3K_4K_5K_6[D]} + \frac{[P]}{K_4K_5K_6} + \frac{[P]}{K_5K_6} + \frac{[P]}{K_6}} \right), K_5 \gg 1$$

$$r_1 = \frac{k_1[A][*]_{total}}{1 + \frac{[P]}{K_6}}$$

$r_1 = k_1[A][*]_{total}$  (At low concentrations of P)

At high concentrations of P, the reaction is inhibited

This fits the experimental data obtained that shows the reaction is first order in the A (diene) and \* (catalyst) and is inhibited by the product at high concentrations.

**Reaction 4 is the slow step.**

$$r_4 = k_4[M * D] - k_{-4}[P * H]$$

$$r_3 = k_3[M *][D] - k_{-3}[M * D]$$

$$\frac{r_3}{k_{-3}} = K_3[M *][D] - [M * D], \frac{r_3}{k_{-3}} \approx 0$$

$$K_3[M *][D] = [M * D]$$

$$r_4 = k_4K_3[M *][D] - k_{-4}[P * H]$$

$$r_2 = k_2[A *] - k_{-2}[M *]$$

$$\frac{r_2}{k_{-2}} = K_2[A^*] - [M^*], \frac{r_2}{k_{-2}} \approx 0$$

$$K_2[A^*] = [M^*]$$

$$r_4 = k_4 K_3 K_2 [A^*][D] - k_{-4}[P^*H]$$

$$r_1 = k_1[A][^*] - k_{-1}[A^*]$$

$$\frac{r_1}{k_{-1}} = K_1[A][^*] - [A^*], \frac{r_1}{k_{-1}} \approx 0$$

$$K_1[A][^*] = [A^*]$$

$$r_4 = k_4 K_3 K_2 K_1 [A][^*][D] - k_{-4}[P^*H]$$

$$r_5 = k_5[P^*H] - k_{-5}[P^*]$$

$$\frac{r_5}{k_{-5}} = K_5[P^*H] - [P^*], \frac{r_5}{k_{-5}} \approx 0$$

$$\frac{[P^*]}{K_5} = [P^*H]$$

$$r_4 = k_4 K_3 K_2 K_1 [A][^*][D] - \frac{k_{-4}[P^*]}{K_5}$$

$$r_6 = k_6[P^*] - k_{-6}[P][^*]$$

$$\frac{r_6}{k_{-6}} = K_6[P^*] - [P][^*], \frac{r_6}{k_{-6}} \approx 0$$

$$\frac{[P][^*]}{K_6} = [P^*H]$$

$$r_4 = k_4 K_3 K_2 K_1 [A][^*][D] - \frac{k_{-4}[P][^*]}{K_5 K_6}$$

$$[^*]_{total} = [^*] + [A^*] + [M^*] + [M^*D] + [P^*H] + [P^*]$$

$$[^*]_{total} = [^*] + K_1[A][^*] + K_2 K_1 [A][^*] + K_3 K_2 K_1 [A][^*][D] + \frac{[P][^*]}{K_5 K_6} + \frac{[P][^*]}{K_6}$$

$$\frac{[^*]_{total}}{1 + K_1[A] + K_2 K_1 [A] + K_3 K_2 K_1 [A][D] + \frac{[P]}{K_5 K_6} + \frac{[P]}{K_6}} = [^*]$$

$$r_4 = k_4 K_3 K_2 K_1 [A] \frac{[^*]_{total}}{1 + K_1[A] + K_2 K_1 [A] + K_3 K_2 K_1 [A][D] + \frac{[P]}{K_5 K_6} + \frac{[P]}{K_6}} - \frac{k_{-4}[P][^*]}{K_5 K_6} \frac{[^*]_{total}}{1 + K_1[A] + K_2 K_1 [A] + K_3 K_2 K_1 [A][D] + \frac{[P]}{K_5 K_6} + \frac{[P]}{K_6}}$$

$$r_4 = \left( k_4 K_3 K_2 K_1 [A] - \frac{k_{-4}[P][^*]}{K_5 K_6} \right) \left( \frac{[^*]_{total}}{1 + K_1[A] + K_2 K_1 [A] + K_3 K_2 K_1 [A][D] + \frac{[P]}{K_5 K_6} + \frac{[P]}{K_6}} \right)$$

$$r_4 = \left( k_4 K_3 K_2 K_1 [A] - \frac{k_{-4}[P][^*]}{K_5 K_6} \right) \left( \frac{[^*]_{total}}{1 + K_1[A] + K_2 K_1 [A] + K_3 K_2 K_1 [A][D] + \frac{[P]}{K_5 K_6} + \frac{[P]}{K_6}} \right), K_5 \gg 1$$

$$r_4 = \frac{k_4 K_3 K_2 K_1 [A][^*]_{total}}{1 + K_1[A] + K_2 K_1 [A] + K_3 K_2 K_1 [A][D] + \frac{[P]}{K_6}}$$

Reaction 4 being the TOLS step does not fit the experimental data obtained that shows the reaction is first order in the A (diene) and \* (catalyst) and is inhibited by the product at high concentrations. Instead, it shows that the reaction is inhibited by A (diene), acrylate (D) and P (product). Thus reaction 4 being the TOLS is not supported by the experimental data.

**Reaction 6 is the slow step.**

$$r_6 = k_6[P^*] - k_{-6}[P][^*]$$

$$r_5 = k_5[P^*H] - k_{-5}[P^*]$$

$$\frac{r_5}{k_{-5}} = K_5[P^*H] - [P^*], \frac{r_5}{k_{-5}} \approx 0$$

$$K_5[P * H] = [P *]$$

$$r_6 = k_6 K_5 [P * H] - k_{-6} [P][*]$$

$$\begin{aligned} r_4 &= k_4 [M * D] - k_{-4} [P * H] \\ \frac{r_4}{k_{-4}} &= K_4 [M * D] - [P * H], \frac{r_4}{k_{-4}} \approx 0 \\ K_4 [M * D] &= [P * H] \end{aligned}$$

$$r_6 = k_6 K_5 K_4 [M * D] - k_{-6} [P][*]$$

$$\begin{aligned} r_3 &= k_3 [M *][D] - k_{-3} [M * D] \\ \frac{r_3}{k_{-3}} &= K_3 [M *][D] - [M * D], \frac{r_3}{k_{-3}} \approx 0 \\ K_3 [M *][D] &= [M * D] \end{aligned}$$

$$r_6 = k_6 K_5 K_4 K_3 [M *][D] - k_{-6} [P][*]$$

$$\begin{aligned} r_2 &= k_2 [A *] - k_{-2} [M *] \\ \frac{r_2}{k_{-2}} &= K_2 [A *] - [M *], \frac{r_2}{k_{-2}} \approx 0 \\ K_2 [A *] &= [M *] \end{aligned}$$

$$r_6 = k_6 K_5 K_4 K_3 K_2 [A *][D] - k_{-6} [P][*]$$

$$\begin{aligned} r_1 &= k_1 [A][*] - k_{-1} [A *] \\ \frac{r_1}{k_{-1}} &= K_1 [A][*] - [A *], \frac{r_1}{k_{-1}} \approx 0 \\ K_1 [A][*] &= [A *] \end{aligned}$$

$$r_6 = k_6 K_5 K_4 K_3 K_2 K_1 [A][*][D] - k_{-6} [P][*]$$

$$[*]_{total} = [*] + [A *] + [M *] + [M * D] + [P * H] + [P *]$$

$$[*]_{total} = [*] + K_1 [A][*] + K_2 K_1 [A][*] + K_3 K_2 K_1 [A][*] + K_4 K_3 K_2 K_1 [A][*][D] + K_5 K_4 K_3 K_2 K_1 [A][*][D]$$

$$\frac{[*]_{total}}{1 + K_1 [A] + K_2 K_1 [A] + K_3 K_2 K_1 [A] + K_4 K_3 K_2 K_1 [A][D] + K_5 K_4 K_3 K_2 K_1 [A][D]} = [*]$$

$$r_6 = k_6 K_5 K_4 K_3 K_2 K_1 [A][D] \frac{[*]_{total}}{1 + K_1 [A] + K_2 K_1 [A] + K_3 K_2 K_1 [A] + K_4 K_3 K_2 K_1 [A][D] + K_5 K_4 K_3 K_2 K_1 [A][D]} - \frac{k_{-6} [P][*]_{total}}{K_2 K_3 K_4 K_5 K_6 [D] 1 + K_1 [A] + K_2 K_1 [A] + K_3 K_2 K_1 [A] + K_4 K_3 K_2 K_1 [A][D] + K_5 K_4 K_3 K_2 K_1 [A][D]}$$

$$r_6 = (k_6 K_5 K_4 K_3 K_2 K_1 [A][D] - k_{-6} [P]) \left( \frac{[*]_{total}}{1 + K_1 [A] + K_2 K_1 [A] + K_3 K_2 K_1 [A] + K_4 K_3 K_2 K_1 [A][D] + K_5 K_4 K_3 K_2 K_1 [A][D]} \right)$$

$$r_6 = (k_6 K_5 K_4 K_3 K_2 K_1 [A][D] - k_{-6} [P]) \left( \frac{[*]_{total}}{1 + K_1 [A] + K_2 K_1 [A] + K_3 K_2 K_1 [A] + K_4 K_3 K_2 K_1 [A][D] + K_5 K_4 K_3 K_2 K_1 [A][D]} \right), K_5$$

$$\gg 1$$

$$r_6 = \frac{k_6 K_5 K_4 K_3 K_2 K_1 [A][D][*]_{total}}{K_5 K_4 K_3 K_2 K_1 [A][D]} - \left( \frac{k_{-6} [P][*]_{total}}{K_5 K_4 K_3 K_2 K_1 [A][D]} \right)$$

Reaction 6 being the TOLS does not fit the experimental data. This would suggest that the reaction is inhibited by equilibrium (suggesting that quantitative conversion would not occur). However, it has been shown experimentally that quantitative conversion is obtained in this reaction.

## REFERENCES

- (1) Perrin, D. D. Armarego, W. L. F. and Perrin, D. R. Purification of Laboratory Chemicals, 2<sup>nd</sup> ed.; Pergamon Press: 1980
- (2) Jing, S. M.; Balasanthiran, V.; Pagar, V.; Gallucci, J. C.; RajanBabu, T. V. Catalytic Enantioselective Hetero-dimerization of Acrylates and 1,3-Dienes. *J. Am. Chem. Soc.* **2017**, *139*, 18034-18043.
- (3) Duvvuri, K.; Dewese, K. R.; Parsutkar, M. M.; Jing, S. M.; Mehta, M.; RajanBabu, T. V. Cationic Co(I)-Intermediates for Hydrofunctionalization reactions: Regio- and Enantioselective Cobalt-Catalyzed 1,2-Hydroboration of 1,3-Dienes. *J. Am. Chem. Soc.* **2019**, *141*, 7365-7375.
- (4) SDBSWeb : <https://sdb.sdb.aist.go.jp> (National Institute of Advanced Industrial Science and Technology, May 1<sup>st</sup> 2019)
- (5) Carmona, P.; Moreno, J. The infrared spectra and structure of methyl acrylate. *J. Mol. Struct.* **1982**, *82*, 177-185.
- (6) Durig, J. R.; Compton, D. A. C. Analysis of torsional spectra of molecules with 2 internal C<sub>3v</sub> rotors. 16. Infrared and Raman spectra, vibrational assignment, methyl torsional potential function, and gas phase thermodynamic functions of 2,3-dimethylbuta-1,3-dien. *J. Phys. Chem.* **1979**, *83*, 2879-2886.
- (7) Kryzstek, J.; Ozarowski, A.; Zvyagin, S. A.; Tesler, J. High Spin Co(I): High-Frequency and -Field EPR Spectroscopy of CoX(PPh<sub>3</sub>)<sub>3</sub>. *Inorg. Chem.* **2012**, *51*, 4954-4964.
- (8) Sacconi, L.; Midollini, S. Halogeno-Complexes of Cobalt(I) and Nickel(I) with 1,1,1-tris(diphenylphosphinomethyl)ethane. *J.C.S. Dalton.* **1972**, 1213-1216.
- (9) Rose, M. J.; Bellone, D. E.; Di Bilio, A. J.; Gray, H. B. Spectroscopic and Magnetic Properties of an Iodo Co<sup>I</sup> Tripodal Phosphine Complex. *Dalton Trans.* **2012**, *41*, 11788-11797.
- (10) Aresta, M.; Rossi, M; Sacco, A. Tetrahedral Complexes of Cobalt(I). *Inorganica Chimica Acta.* **1969**, 227-231.
- (11) Kiefer, G.; Vrabel, H.; Scopelliti, R.; Severin, K. The Intricate Chemistry of Cobalt(II) Halides and Bis(diphenylphosphanyl)ethane. *Eur. J. Inorg. Chem.* **2013**, 4619-4921.
- (12) Nielson C.; Bures J.; Visual kinetic analysis. *Chem. Sci.* **2010**, *10*, 348-353.



## Experimental Summary of X-Ray Crystallography

The single crystal X-ray diffraction studies were carried out on a Nonius Kappa diffractometer equipped with a Bruker APEX-II CCD and Mo K $\alpha$  radiation ( $\lambda = 0.71073 \text{ \AA}$ ). A 0.357 x 0.313 x 0.268 mm piece of a dark bluish green block was mounted on a MiTeGen Micromount with CHRISTO-LUBE MCG 1024 oil. Data were collected in a nitrogen gas stream at 100(2) K using  $\omega$  and  $\phi$  scans. Crystal-to-detector distance was 40 mm and exposure time was 5 seconds per frame using a scan width of 0.75°. Data collection was 100% complete to 25.00° in  $\omega$ . A total of 231454 reflections were collected covering the indices,  $-20 \leq h \leq 20$ ,  $-15 \leq k \leq 15$ ,  $-46 \leq l \leq 46$ . 15955 reflections were found to be symmetry independent, with a  $R_{\text{int}}$  of 0.0438. Indexing and unit cell refinement indicated a primitive, orthorhombic lattice. The space group was found to be  $P2_1/c$ . The data were integrated using the Bruker SAINT software program and scaled using the SADABS software program. Solution by direct methods (SHELXT) produced a complete phasing model consistent with the proposed structure.

All nonhydrogen atoms were refined anisotropically by full-matrix least-squares (SHELXL-2014). All hydrogen atoms were placed using a riding model. Their positions were constrained relative to their parent atom using the appropriate HFIX command in SHELXL-2014. Crystallographic data are summarized in Table 1.

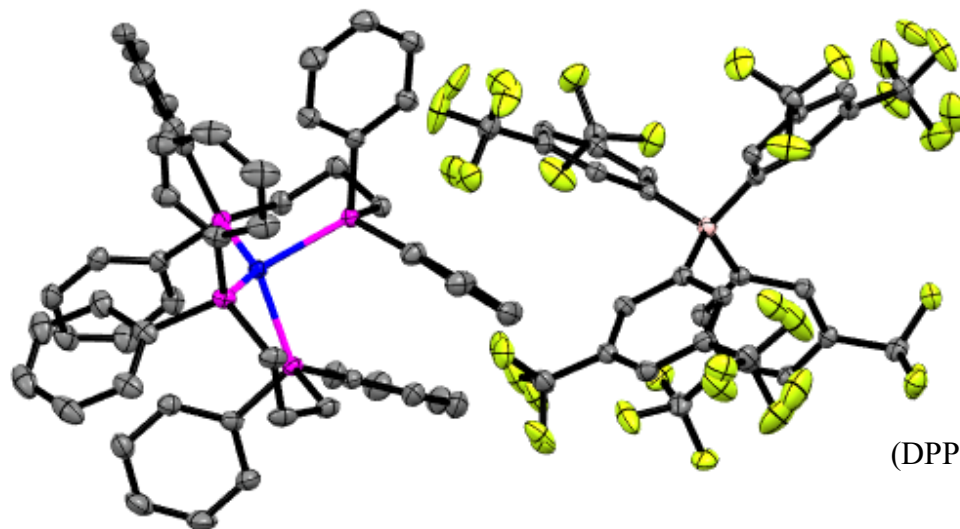

$(\text{DPPP})_2\text{Co}(\text{I})^+ \text{BArF}^-$

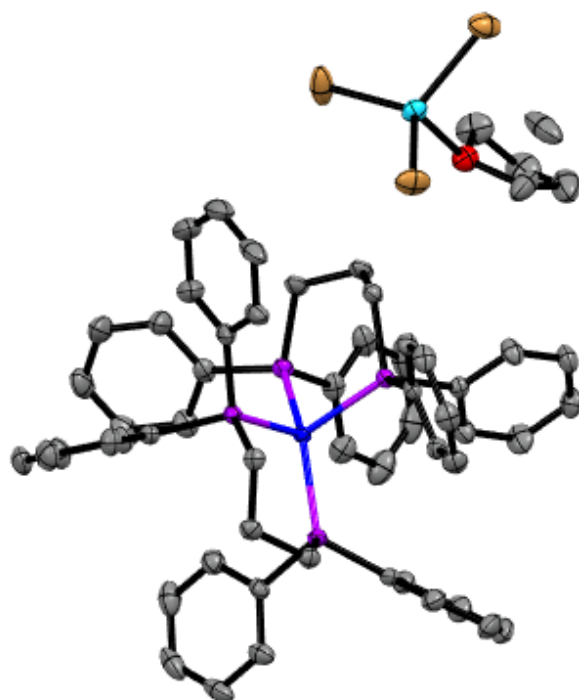

$(\text{DPPP})_2\text{Co}(\text{I})^+ \text{ZnBr}_3^-$

**Table S6.** Crystal data and structure refinement for RBabu\_MP-05-007.

|                                   |                                                                                                                                    |
|-----------------------------------|------------------------------------------------------------------------------------------------------------------------------------|
| Report date                       | 2019-08-06                                                                                                                         |
| Identification code               | MP-05-007                                                                                                                          |
| Empirical formula                 | C86 H64 B Co F24 P4                                                                                                                |
| Molecular formula                 | C54 H52 Co P4, C32 H12 B F24                                                                                                       |
| Formula weight                    | 1746.99                                                                                                                            |
| Temperature                       | 100.0 K                                                                                                                            |
| Wavelength                        | 0.71073 Å                                                                                                                          |
| Crystal system                    | Monoclinic                                                                                                                         |
| Space group                       | P 1 21/c 1                                                                                                                         |
| Unit cell dimensions              | a = 16.6366(7) Å $\alpha = 90^\circ$ .<br>b = 12.7954(6) Å $\beta = 101.172(2)^\circ$ .<br>c = 37.4749(17) Å $\gamma = 90^\circ$ . |
| Volume                            | 7826.2(6) Å <sup>3</sup>                                                                                                           |
| Z                                 | 4                                                                                                                                  |
| Density (calculated)              | 1.483 Mg/m <sup>3</sup>                                                                                                            |
| Absorption coefficient            | 0.405 mm <sup>-1</sup>                                                                                                             |
| F(000)                            | 3552                                                                                                                               |
| Crystal size                      | 0.357 x 0.313 x 0.268 mm <sup>3</sup>                                                                                              |
| Crystal color, habit              | Dark Bluish Green Block                                                                                                            |
| Theta range for data collection   | 1.248 to 26.379°.                                                                                                                  |
| Index ranges                      | -20 ≤ h ≤ 20, -15 ≤ k ≤ 15, -46 ≤ l ≤ 46                                                                                           |
| Reflections collected             | 231454                                                                                                                             |
| Independent reflections           | 15955 [R(int) = 0.0438, R(sigma) = 0.0180]                                                                                         |
| Completeness to theta = 25.000°   | 100.0 %                                                                                                                            |
| Absorption correction             | Semi-empirical from equivalents                                                                                                    |
| Max. and min. transmission        | 0.2602 and 0.2187                                                                                                                  |
| Refinement method                 | Full-matrix least-squares on F <sup>2</sup>                                                                                        |
| Data / restraints / parameters    | 15955 / 144 / 1144                                                                                                                 |
| Goodness-of-fit on F <sup>2</sup> | 1.023                                                                                                                              |
| Final R indices [I > 2sigma(I)]   | R1 = 0.0348, wR2 = 0.0881                                                                                                          |
| R indices (all data)              | R1 = 0.0421, wR2 = 0.0921                                                                                                          |
| Extinction coefficient            | n/a                                                                                                                                |
| Largest diff. peak and hole       | 0.503 and -0.332 e.Å <sup>-3</sup>                                                                                                 |

**Table S7.** Atomic coordinates ( $\times 10^4$ ) and equivalent isotropic displacement parameters ( $\text{\AA}^2 \times 10^3$ ) for RBabu\_MP-05-007.  $U(\text{eq})$  is defined as one third of the trace of the orthogonalized  $U^{\text{ij}}$  tensor.

|       | x        | y        | z       | U(eq) |
|-------|----------|----------|---------|-------|
| Co(1) | 1677(1)  | 2941(1)  | 3692(1) | 17(1) |
| P(1)  | 1478(1)  | 1588(1)  | 4052(1) | 19(1) |
| P(2)  | 2990(1)  | 3235(1)  | 3973(1) | 19(1) |
| P(3)  | 1067(1)  | 4379(1)  | 3882(1) | 20(1) |
| P(4)  | 1437(1)  | 3382(1)  | 3091(1) | 22(1) |
| C(1)  | 1985(1)  | 1712(1)  | 4530(1) | 24(1) |
| C(2)  | 2903(1)  | 1948(1)  | 4577(1) | 25(1) |
| C(3)  | 3104(1)  | 3059(1)  | 4467(1) | 23(1) |
| C(4)  | 1493(1)  | 4785(1)  | 3010(1) | 28(1) |
| C(5)  | 943(1)   | 5444(1)  | 3208(1) | 29(1) |
| C(6)  | 1248(1)  | 5547(1)  | 3620(1) | 27(1) |
| C(7)  | 412(1)   | 1289(1)  | 4065(1) | 22(1) |
| C(8)  | 31(1)    | 1701(2)  | 4333(1) | 29(1) |
| C(9)  | -809(1)  | 1593(2)  | 4308(1) | 35(1) |
| C(10) | -1274(1) | 1075(2)  | 4016(1) | 34(1) |
| C(11) | -894(1)  | 633(1)   | 3754(1) | 31(1) |
| C(12) | -57(1)   | 737(1)   | 3778(1) | 26(1) |
| C(13) | 1839(1)  | 343(1)   | 3906(1) | 23(1) |
| C(14) | 1855(1)  | -561(1)  | 4114(1) | 32(1) |
| C(15) | 2105(1)  | -1494(2) | 3987(1) | 42(1) |
| C(16) | 2340(1)  | -1547(2) | 3654(1) | 41(1) |
| C(17) | 2325(1)  | -660(2)  | 3445(1) | 37(1) |
| C(18) | 2075(1)  | 283(2)   | 3572(1) | 29(1) |
| C(19) | 3823(1)  | 2434(1)  | 3864(1) | 22(1) |
| C(20) | 3713(1)  | 1878(1)  | 3542(1) | 29(1) |
| C(21) | 4355(1)  | 1311(2)  | 3447(1) | 38(1) |
| C(22) | 5112(1)  | 1306(2)  | 3674(1) | 34(1) |
| C(23) | 5234(1)  | 1871(1)  | 3993(1) | 29(1) |
| C(24) | 4597(1)  | 2430(1)  | 4089(1) | 26(1) |
| C(25) | 3416(1)  | 4534(1)  | 3925(1) | 23(1) |
| C(26) | 3610(1)  | 4792(1)  | 3591(1) | 30(1) |
| C(27) | 3887(1)  | 5782(2)  | 3526(1) | 33(1) |
| C(28) | 3979(1)  | 6526(2)  | 3799(1) | 33(1) |
| C(29) | 3807(1)  | 6276(2)  | 4133(1) | 34(1) |
| C(30) | 3529(1)  | 5279(1)  | 4198(1) | 28(1) |
| C(31) | 1301(1)  | 4880(1)  | 4350(1) | 24(1) |
| C(32) | 1788(1)  | 5757(1)  | 4447(1) | 31(1) |
| C(33) | 1944(1)  | 6121(2)  | 4801(1) | 39(1) |
| C(34) | 1616(1)  | 5623(2)  | 5064(1) | 40(1) |

|        |          |          |          |       |
|--------|----------|----------|----------|-------|
| C(35)  | 1124(1)  | 4753(2)  | 4972(1)  | 38(1) |
| C(36)  | 970(1)   | 4381(2)  | 4620(1)  | 32(1) |
| C(37)  | -52(1)   | 4346(1)  | 3810(1)  | 23(1) |
| C(38)  | -491(1)  | 5136(1)  | 3944(1)  | 32(1) |
| C(39)  | -1337(1) | 5097(2)  | 3886(1)  | 40(1) |
| C(40)  | -1750(1) | 4277(2)  | 3692(1)  | 39(1) |
| C(41)  | -1327(1) | 3495(2)  | 3556(1)  | 33(1) |
| C(42)  | -476(1)  | 3526(1)  | 3619(1)  | 25(1) |
| C(43)  | 404(1)   | 3001(2)  | 2860(1)  | 26(1) |
| C(44)  | -107(1)  | 3639(2)  | 2615(1)  | 33(1) |
| C(45)  | -897(1)  | 3307(2)  | 2466(1)  | 43(1) |
| C(46)  | -1177(1) | 2347(2)  | 2554(1)  | 44(1) |
| C(47)  | -672(1)  | 1702(2)  | 2792(1)  | 39(1) |
| C(48)  | 113(1)   | 2031(2)  | 2945(1)  | 31(1) |
| C(49)  | 2094(1)  | 2791(1)  | 2806(1)  | 26(1) |
| C(50)  | 1975(1)  | 1752(2)  | 2701(1)  | 31(1) |
| C(51)  | 2525(1)  | 1247(2)  | 2523(1)  | 38(1) |
| C(52)  | 3197(1)  | 1772(2)  | 2451(1)  | 44(1) |
| C(53)  | 3312(1)  | 2807(2)  | 2547(1)  | 46(1) |
| C(54)  | 2762(1)  | 3320(2)  | 2721(1)  | 37(1) |
| F(1)   | 7393(1)  | 11818(1) | 4564(1)  | 33(1) |
| F(2)   | 8115(1)  | 10681(1) | 4904(1)  | 32(1) |
| F(3)   | 7072(1)  | 11371(1) | 5070(1)  | 41(1) |
| F(4)   | 4343(1)  | 10080(1) | 4586(1)  | 32(1) |
| F(5)   | 4162(1)  | 8990(1)  | 4140(1)  | 50(1) |
| F(6)   | 4519(1)  | 8437(1)  | 4687(1)  | 40(1) |
| F(7)   | 6466(1)  | 5328(1)  | 4860(1)  | 40(1) |
| F(8)   | 5277(1)  | 4787(1)  | 4596(1)  | 50(1) |
| F(9)   | 6318(1)  | 3818(1)  | 4610(1)  | 40(1) |
| F(10)  | 5406(6)  | 3659(5)  | 3265(1)  | 60(1) |
| F(10B) | 5194(12) | 4830(30) | 3040(6)  | 57(4) |
| F(11)  | 5322(3)  | 5102(4)  | 2974(2)  | 40(1) |
| F(11B) | 5800(20) | 3520(8)  | 3292(4)  | 55(4) |
| F(12)  | 6458(3)  | 4285(7)  | 3082(2)  | 51(1) |
| F(12B) | 6417(15) | 4570(20) | 3032(7)  | 49(4) |
| F(13)  | 4000(1)  | 8019(4)  | 3066(1)  | 45(1) |
| F(13B) | 3974(7)  | 8399(13) | 3152(4)  | 45(1) |
| F(14)  | 3899(5)  | 9423(5)  | 2742(2)  | 36(1) |
| F(14B) | 4326(10) | 7792(14) | 2682(7)  | 61(4) |
| F(15)  | 4389(2)  | 8015(2)  | 2552(1)  | 40(1) |
| F(15B) | 3970(20) | 9320(20) | 2693(10) | 37(4) |
| F(16)  | 6566(3)  | 11799(3) | 3027(1)  | 61(1) |
| F(16B) | 6943(3)  | 11666(4) | 3101(2)  | 72(1) |
| F(17)  | 6663(4)  | 10938(8) | 2550(2)  | 45(1) |

|        |           |          |         |       |
|--------|-----------|----------|---------|-------|
| F(17B) | 6486(4)   | 11114(8) | 2560(2) | 49(1) |
| F(18)  | 7619(3)   | 10874(4) | 3015(1) | 78(1) |
| F(18B) | 7615(2)   | 10549(4) | 2868(1) | 48(1) |
| F(19)  | 9101(1)   | 8708(1)  | 3024(1) | 50(1) |
| F(20)  | 9295(1)   | 7064(1)  | 3052(1) | 45(1) |
| F(21)  | 10253(1)  | 8081(1)  | 3299(1) | 45(1) |
| F(22)  | 10666(1)  | 8119(2)  | 4583(1) | 56(1) |
| F(22B) | 10479(15) | 7530(20) | 4604(7) | 49(4) |
| F(23)  | 9718(1)   | 8946(1)  | 4770(1) | 67(1) |
| F(23B) | 10205(16) | 8981(19) | 4622(6) | 49(1) |
| F(24)  | 9797(1)   | 7308(1)  | 4821(1) | 49(1) |
| F(24B) | 9509(13)  | 7890(30) | 4846(5) | 50(5) |
| C(55)  | 6661(1)   | 8669(1)  | 4171(1) | 19(1) |
| C(56)  | 7132(1)   | 9461(1)  | 4364(1) | 20(1) |
| C(57)  | 6813(1)   | 10146(1) | 4591(1) | 21(1) |
| C(58)  | 6001(1)   | 10087(1) | 4625(1) | 22(1) |
| C(59)  | 5523(1)   | 9311(1)  | 4434(1) | 22(1) |
| C(60)  | 5848(1)   | 8614(1)  | 4219(1) | 21(1) |
| C(61)  | 7342(1)   | 10994(1) | 4782(1) | 25(1) |
| C(62)  | 4643(1)   | 9213(2)  | 4460(1) | 29(1) |
| C(63)  | 6603(1)   | 6745(1)  | 3877(1) | 19(1) |
| C(64)  | 6502(1)   | 6279(1)  | 4205(1) | 21(1) |
| C(65)  | 6193(1)   | 5278(1)  | 4218(1) | 22(1) |
| C(66)  | 5958(1)   | 4690(1)  | 3904(1) | 23(1) |
| C(67)  | 6067(1)   | 5123(1)  | 3580(1) | 22(1) |
| C(68)  | 6394(1)   | 6121(1)  | 3568(1) | 21(1) |
| C(69)  | 6063(1)   | 4818(1)  | 4570(1) | 28(1) |
| C(70)  | 5826(1)   | 4528(1)  | 3232(1) | 30(1) |
| C(71)  | 6472(1)   | 8536(1)  | 3484(1) | 19(1) |
| C(72)  | 5662(1)   | 8311(1)  | 3318(1) | 20(1) |
| C(73)  | 5236(1)   | 8907(1)  | 3033(1) | 22(1) |
| C(74)  | 5602(1)   | 9742(1)  | 2894(1) | 24(1) |
| C(75)  | 6405(1)   | 9974(1)  | 3051(1) | 24(1) |
| C(76)  | 6823(1)   | 9395(1)  | 3342(1) | 21(1) |
| C(77)  | 4384(1)   | 8596(2)  | 2858(1) | 29(1) |
| C(78)  | 6829(1)   | 10860(2) | 2905(1) | 36(1) |
| C(79)  | 7931(1)   | 7910(1)  | 3881(1) | 19(1) |
| C(80)  | 8281(1)   | 7872(1)  | 3570(1) | 20(1) |
| C(81)  | 9124(1)   | 7914(1)  | 3591(1) | 22(1) |
| C(82)  | 9658(1)   | 7987(1)  | 3921(1) | 22(1) |
| C(83)  | 9328(1)   | 7982(1)  | 4233(1) | 21(1) |
| C(84)  | 8485(1)   | 7928(1)  | 4212(1) | 20(1) |
| C(85)  | 9444(1)   | 7939(2)  | 3245(1) | 28(1) |
| C(86)  | 9875(1)   | 8095(2)  | 4597(1) | 27(1) |

B(1)

6938(1)

7941(1)

3856(1)

18(1)

---

**Table S8.** Bond lengths [Å] and angles [°] for RBabu\_MP-05-007.

|             |            |             |          |
|-------------|------------|-------------|----------|
| Co(1)-P(1)  | 2.2575(5)  | C(12)-H(12) | 0.9500   |
| Co(1)-P(2)  | 2.2633(5)  | C(13)-C(14) | 1.392(2) |
| Co(1)-P(3)  | 2.2811(5)  | C(13)-C(18) | 1.386(3) |
| Co(1)-P(4)  | 2.2823(5)  | C(14)-H(14) | 0.9500   |
| P(1)-C(1)   | 1.8330(17) | C(14)-C(15) | 1.379(3) |
| P(1)-C(7)   | 1.8237(17) | C(15)-H(15) | 0.9500   |
| P(1)-C(13)  | 1.8232(17) | C(15)-C(16) | 1.379(3) |
| P(2)-C(3)   | 1.8388(17) | C(16)-H(16) | 0.9500   |
| P(2)-C(19)  | 1.8325(17) | C(16)-C(17) | 1.376(3) |
| P(2)-C(25)  | 1.8299(17) | C(17)-H(17) | 0.9500   |
| P(3)-C(6)   | 1.8460(17) | C(17)-C(18) | 1.389(3) |
| P(3)-C(31)  | 1.8343(18) | C(18)-H(18) | 0.9500   |
| P(3)-C(37)  | 1.8294(17) | C(19)-C(20) | 1.383(2) |
| P(4)-C(4)   | 1.8264(18) | C(19)-C(24) | 1.395(2) |
| P(4)-C(43)  | 1.8334(18) | C(20)-H(20) | 0.9500   |
| P(4)-C(49)  | 1.8323(18) | C(20)-C(21) | 1.392(3) |
| C(1)-H(1A)  | 0.9900     | C(21)-H(21) | 0.9500   |
| C(1)-H(1B)  | 0.9900     | C(21)-C(22) | 1.376(3) |
| C(1)-C(2)   | 1.533(2)   | C(22)-H(22) | 0.9500   |
| C(2)-H(2A)  | 0.9900     | C(22)-C(23) | 1.380(3) |
| C(2)-H(2B)  | 0.9900     | C(23)-H(23) | 0.9500   |
| C(2)-C(3)   | 1.535(2)   | C(23)-C(24) | 1.383(2) |
| C(3)-H(3A)  | 0.9900     | C(24)-H(24) | 0.9500   |
| C(3)-H(3B)  | 0.9900     | C(25)-C(26) | 1.393(3) |
| C(4)-H(4A)  | 0.9900     | C(25)-C(30) | 1.385(2) |
| C(4)-H(4B)  | 0.9900     | C(26)-H(26) | 0.9500   |
| C(4)-C(5)   | 1.536(2)   | C(26)-C(27) | 1.385(3) |
| C(5)-H(5A)  | 0.9900     | C(27)-H(27) | 0.9500   |
| C(5)-H(5B)  | 0.9900     | C(27)-C(28) | 1.382(3) |
| C(5)-C(6)   | 1.534(3)   | C(28)-H(28) | 0.9500   |
| C(6)-H(6A)  | 0.9900     | C(28)-C(29) | 1.374(3) |
| C(6)-H(6B)  | 0.9900     | C(29)-H(29) | 0.9500   |
| C(7)-C(8)   | 1.390(2)   | C(29)-C(30) | 1.395(3) |
| C(7)-C(12)  | 1.394(2)   | C(30)-H(30) | 0.9500   |
| C(8)-H(8)   | 0.9500     | C(31)-C(32) | 1.390(2) |
| C(8)-C(9)   | 1.388(3)   | C(31)-C(36) | 1.397(3) |
| C(9)-H(9)   | 0.9500     | C(32)-H(32) | 0.9500   |
| C(9)-C(10)  | 1.381(3)   | C(32)-C(33) | 1.383(3) |
| C(10)-H(10) | 0.9500     | C(33)-H(33) | 0.9500   |
| C(10)-C(11) | 1.385(3)   | C(33)-C(34) | 1.373(3) |
| C(11)-H(11) | 0.9500     | C(34)-H(34) | 0.9500   |
| C(11)-C(12) | 1.384(2)   | C(34)-C(35) | 1.386(3) |



|             |            |              |           |
|-------------|------------|--------------|-----------|
| C(35)-H(35) | 0.9500     | F(9)-C(69)   | 1.347(2)  |
| C(35)-C(36) | 1.381(3)   | F(10)-C(70)  | 1.331(3)  |
| C(36)-H(36) | 0.9500     | F(10B)-C(70) | 1.219(15) |
| C(37)-C(38) | 1.397(2)   | F(11)-C(70)  | 1.365(4)  |
| C(37)-C(42) | 1.383(2)   | F(11B)-C(70) | 1.311(11) |
| C(38)-H(38) | 0.9500     | F(12)-C(70)  | 1.323(5)  |
| C(38)-C(39) | 1.383(3)   | F(12B)-C(70) | 1.349(18) |
| C(39)-H(39) | 0.9500     | F(13)-C(77)  | 1.325(3)  |
| C(39)-C(40) | 1.382(3)   | F(13B)-C(77) | 1.426(14) |
| C(40)-H(40) | 0.9500     | F(14)-C(77)  | 1.350(5)  |
| C(40)-C(41) | 1.379(3)   | F(14B)-C(77) | 1.216(12) |
| C(41)-H(41) | 0.9500     | F(15)-C(77)  | 1.366(3)  |
| C(41)-C(42) | 1.390(2)   | F(15B)-C(77) | 1.24(3)   |
| C(42)-H(42) | 0.9500     | F(16)-C(78)  | 1.385(5)  |
| C(43)-C(44) | 1.388(3)   | F(16B)-C(78) | 1.258(5)  |
| C(43)-C(48) | 1.392(3)   | F(17)-C(78)  | 1.308(6)  |
| C(44)-H(44) | 0.9500     | F(17B)-C(78) | 1.348(6)  |
| C(44)-C(45) | 1.393(3)   | F(18)-C(78)  | 1.299(5)  |
| C(45)-H(45) | 0.9500     | F(18B)-C(78) | 1.399(4)  |
| C(45)-C(46) | 1.377(3)   | F(19)-C(85)  | 1.340(2)  |
| C(46)-H(46) | 0.9500     | F(20)-C(85)  | 1.329(2)  |
| C(46)-C(47) | 1.378(3)   | F(21)-C(85)  | 1.334(2)  |
| C(47)-H(47) | 0.9500     | F(22)-C(86)  | 1.326(2)  |
| C(47)-C(48) | 1.384(3)   | F(22B)-C(86) | 1.23(2)   |
| C(48)-H(48) | 0.9500     | F(23)-C(86)  | 1.319(2)  |
| C(49)-C(50) | 1.390(3)   | F(23B)-C(86) | 1.26(2)   |
| C(49)-C(54) | 1.390(3)   | F(24)-C(86)  | 1.334(2)  |
| C(50)-H(50) | 0.9500     | F(24B)-C(86) | 1.24(2)   |
| C(50)-C(51) | 1.392(3)   | C(55)-C(56)  | 1.394(2)  |
| C(51)-H(51) | 0.9500     | C(55)-C(60)  | 1.399(2)  |
| C(51)-C(52) | 1.375(3)   | C(55)-B(1)   | 1.640(2)  |
| C(52)-H(52) | 0.9500     | C(56)-H(56)  | 0.9500    |
| C(52)-C(53) | 1.376(3)   | C(56)-C(57)  | 1.397(2)  |
| C(53)-H(53) | 0.9500     | C(57)-C(58)  | 1.383(2)  |
| C(53)-C(54) | 1.390(3)   | C(57)-C(61)  | 1.489(2)  |
| C(54)-H(54) | 0.9500     | C(58)-H(58)  | 0.9500    |
| F(1)-C(61)  | 1.346(2)   | C(58)-C(59)  | 1.382(2)  |
| F(2)-C(61)  | 1.339(2)   | C(59)-C(60)  | 1.383(2)  |
| F(3)-C(61)  | 1.3394(19) | C(59)-C(62)  | 1.491(2)  |
| F(4)-C(62)  | 1.340(2)   | C(60)-H(60)  | 0.9500    |
| F(5)-C(62)  | 1.337(2)   | C(63)-C(64)  | 1.403(2)  |
| F(6)-C(62)  | 1.349(2)   | C(63)-C(68)  | 1.396(2)  |
| F(7)-C(69)  | 1.331(2)   | C(63)-B(1)   | 1.635(2)  |
| F(8)-C(69)  | 1.331(2)   | C(64)-H(64)  | 0.9500    |

|                  |             |                  |            |
|------------------|-------------|------------------|------------|
| C(64)-C(65)      | 1.385(2)    | C(13)-P(1)-C(7)  | 101.77(8)  |
| C(65)-C(66)      | 1.388(2)    | C(3)-P(2)-Co(1)  | 110.47(6)  |
| C(65)-C(69)      | 1.497(2)    | C(19)-P(2)-Co(1) | 120.51(6)  |
| C(66)-H(66)      | 0.9500      | C(19)-P(2)-C(3)  | 102.73(8)  |
| C(66)-C(67)      | 1.379(2)    | C(25)-P(2)-Co(1) | 117.54(5)  |
| C(67)-C(68)      | 1.392(2)    | C(25)-P(2)-C(3)  | 104.09(8)  |
| C(67)-C(70)      | 1.494(2)    | C(25)-P(2)-C(19) | 99.32(7)   |
| C(68)-H(68)      | 0.9500      | C(6)-P(3)-Co(1)  | 110.97(6)  |
| C(71)-C(72)      | 1.401(2)    | C(31)-P(3)-Co(1) | 123.74(6)  |
| C(71)-C(76)      | 1.398(2)    | C(31)-P(3)-C(6)  | 101.57(8)  |
| C(71)-B(1)       | 1.643(2)    | C(37)-P(3)-Co(1) | 115.86(6)  |
| C(72)-H(72)      | 0.9500      | C(37)-P(3)-C(6)  | 101.84(8)  |
| C(72)-C(73)      | 1.390(2)    | C(37)-P(3)-C(31) | 99.88(8)   |
| C(73)-C(74)      | 1.382(2)    | C(4)-P(4)-Co(1)  | 113.70(6)  |
| C(73)-C(77)      | 1.496(2)    | C(4)-P(4)-C(43)  | 104.85(9)  |
| C(74)-H(74)      | 0.9500      | C(4)-P(4)-C(49)  | 104.69(8)  |
| C(74)-C(75)      | 1.383(2)    | C(43)-P(4)-Co(1) | 111.73(6)  |
| C(75)-C(76)      | 1.389(2)    | C(49)-P(4)-Co(1) | 117.54(6)  |
| C(75)-C(78)      | 1.494(2)    | C(49)-P(4)-C(43) | 103.02(8)  |
| C(76)-H(76)      | 0.9500      | P(1)-C(1)-H(1A)  | 109.0      |
| C(79)-C(80)      | 1.400(2)    | P(1)-C(1)-H(1B)  | 109.0      |
| C(79)-C(84)      | 1.396(2)    | H(1A)-C(1)-H(1B) | 107.8      |
| C(79)-B(1)       | 1.638(2)    | C(2)-C(1)-P(1)   | 112.97(12) |
| C(80)-H(80)      | 0.9500      | C(2)-C(1)-H(1A)  | 109.0      |
| C(80)-C(81)      | 1.391(2)    | C(2)-C(1)-H(1B)  | 109.0      |
| C(81)-C(82)      | 1.379(2)    | C(1)-C(2)-H(2A)  | 108.6      |
| C(81)-C(85)      | 1.493(2)    | C(1)-C(2)-H(2B)  | 108.6      |
| C(82)-H(82)      | 0.9500      | C(1)-C(2)-C(3)   | 114.55(14) |
| C(82)-C(83)      | 1.385(2)    | H(2A)-C(2)-H(2B) | 107.6      |
| C(83)-C(84)      | 1.391(2)    | C(3)-C(2)-H(2A)  | 108.6      |
| C(83)-C(86)      | 1.493(2)    | C(3)-C(2)-H(2B)  | 108.6      |
| C(84)-H(84)      | 0.9500      | P(2)-C(3)-H(3A)  | 108.9      |
|                  |             | P(2)-C(3)-H(3B)  | 108.9      |
| P(1)-Co(1)-P(2)  | 95.185(17)  | C(2)-C(3)-P(2)   | 113.49(12) |
| P(1)-Co(1)-P(3)  | 107.853(17) | C(2)-C(3)-H(3A)  | 108.9      |
| P(1)-Co(1)-P(4)  | 139.532(18) | C(2)-C(3)-H(3B)  | 108.9      |
| P(2)-Co(1)-P(3)  | 99.716(17)  | H(3A)-C(3)-H(3B) | 107.7      |
| P(2)-Co(1)-P(4)  | 112.730(18) | P(4)-C(4)-H(4A)  | 108.8      |
| P(3)-Co(1)-P(4)  | 96.070(17)  | P(4)-C(4)-H(4B)  | 108.8      |
| C(1)-P(1)-Co(1)  | 115.05(6)   | H(4A)-C(4)-H(4B) | 107.7      |
| C(7)-P(1)-Co(1)  | 115.67(5)   | C(5)-C(4)-P(4)   | 113.87(12) |
| C(7)-P(1)-C(1)   | 104.90(8)   | C(5)-C(4)-H(4A)  | 108.8      |
| C(13)-P(1)-Co(1) | 113.37(6)   | C(5)-C(4)-H(4B)  | 108.8      |
| C(13)-P(1)-C(1)  | 104.59(8)   | C(4)-C(5)-H(5A)  | 108.5      |

|                   |            |                   |            |
|-------------------|------------|-------------------|------------|
| C(4)-C(5)-H(5B)   | 108.5      | C(13)-C(18)-C(17) | 120.88(18) |
| H(5A)-C(5)-H(5B)  | 107.5      | C(13)-C(18)-H(18) | 119.6      |
| C(6)-C(5)-C(4)    | 114.90(15) | C(17)-C(18)-H(18) | 119.6      |
| C(6)-C(5)-H(5A)   | 108.5      | C(20)-C(19)-P(2)  | 120.25(13) |
| C(6)-C(5)-H(5B)   | 108.5      | C(20)-C(19)-C(24) | 118.50(16) |
| P(3)-C(6)-H(6A)   | 108.7      | C(24)-C(19)-P(2)  | 121.08(13) |
| P(3)-C(6)-H(6B)   | 108.7      | C(19)-C(20)-H(20) | 119.6      |
| C(5)-C(6)-P(3)    | 114.27(12) | C(19)-C(20)-C(21) | 120.79(17) |
| C(5)-C(6)-H(6A)   | 108.7      | C(21)-C(20)-H(20) | 119.6      |
| C(5)-C(6)-H(6B)   | 108.7      | C(20)-C(21)-H(21) | 119.9      |
| H(6A)-C(6)-H(6B)  | 107.6      | C(22)-C(21)-C(20) | 120.10(18) |
| C(8)-C(7)-P(1)    | 121.54(13) | C(22)-C(21)-H(21) | 119.9      |
| C(8)-C(7)-C(12)   | 118.89(16) | C(21)-C(22)-H(22) | 120.2      |
| C(12)-C(7)-P(1)   | 119.16(13) | C(21)-C(22)-C(23) | 119.66(17) |
| C(7)-C(8)-H(8)    | 119.8      | C(23)-C(22)-H(22) | 120.2      |
| C(9)-C(8)-C(7)    | 120.49(17) | C(22)-C(23)-H(23) | 119.8      |
| C(9)-C(8)-H(8)    | 119.8      | C(22)-C(23)-C(24) | 120.43(17) |
| C(8)-C(9)-H(9)    | 119.9      | C(24)-C(23)-H(23) | 119.8      |
| C(10)-C(9)-C(8)   | 120.24(18) | C(19)-C(24)-H(24) | 119.7      |
| C(10)-C(9)-H(9)   | 119.9      | C(23)-C(24)-C(19) | 120.50(17) |
| C(9)-C(10)-H(10)  | 120.2      | C(23)-C(24)-H(24) | 119.7      |
| C(9)-C(10)-C(11)  | 119.58(17) | C(26)-C(25)-P(2)  | 117.75(13) |
| C(11)-C(10)-H(10) | 120.2      | C(30)-C(25)-P(2)  | 123.52(14) |
| C(10)-C(11)-H(11) | 119.8      | C(30)-C(25)-C(26) | 118.70(16) |
| C(12)-C(11)-C(10) | 120.43(18) | C(25)-C(26)-H(26) | 119.5      |
| C(12)-C(11)-H(11) | 119.8      | C(27)-C(26)-C(25) | 121.10(18) |
| C(7)-C(12)-H(12)  | 119.8      | C(27)-C(26)-H(26) | 119.5      |
| C(11)-C(12)-C(7)  | 120.30(17) | C(26)-C(27)-H(27) | 120.2      |
| C(11)-C(12)-H(12) | 119.8      | C(28)-C(27)-C(26) | 119.57(18) |
| C(14)-C(13)-P(1)  | 122.05(14) | C(28)-C(27)-H(27) | 120.2      |
| C(18)-C(13)-P(1)  | 119.11(13) | C(27)-C(28)-H(28) | 120.0      |
| C(18)-C(13)-C(14) | 118.79(17) | C(29)-C(28)-C(27) | 119.99(17) |
| C(13)-C(14)-H(14) | 120.0      | C(29)-C(28)-H(28) | 120.0      |
| C(15)-C(14)-C(13) | 120.02(19) | C(28)-C(29)-H(29) | 119.7      |
| C(15)-C(14)-H(14) | 120.0      | C(28)-C(29)-C(30) | 120.53(18) |
| C(14)-C(15)-H(15) | 119.6      | C(30)-C(29)-H(29) | 119.7      |
| C(14)-C(15)-C(16) | 120.81(19) | C(25)-C(30)-C(29) | 120.07(18) |
| C(16)-C(15)-H(15) | 119.6      | C(25)-C(30)-H(30) | 120.0      |
| C(15)-C(16)-H(16) | 120.1      | C(29)-C(30)-H(30) | 120.0      |
| C(17)-C(16)-C(15) | 119.76(18) | C(32)-C(31)-P(3)  | 122.43(14) |
| C(17)-C(16)-H(16) | 120.1      | C(32)-C(31)-C(36) | 118.11(17) |
| C(16)-C(17)-H(17) | 120.1      | C(36)-C(31)-P(3)  | 119.46(13) |
| C(16)-C(17)-C(18) | 119.74(19) | C(31)-C(32)-H(32) | 119.5      |
| C(18)-C(17)-H(17) | 120.1      | C(33)-C(32)-C(31) | 120.92(18) |

|                   |            |                   |            |
|-------------------|------------|-------------------|------------|
| C(33)-C(32)-H(32) | 119.5      | C(46)-C(47)-C(48) | 119.7(2)   |
| C(32)-C(33)-H(33) | 119.8      | C(48)-C(47)-H(47) | 120.2      |
| C(34)-C(33)-C(32) | 120.49(19) | C(43)-C(48)-H(48) | 119.4      |
| C(34)-C(33)-H(33) | 119.8      | C(47)-C(48)-C(43) | 121.22(19) |
| C(33)-C(34)-H(34) | 120.3      | C(47)-C(48)-H(48) | 119.4      |
| C(33)-C(34)-C(35) | 119.43(19) | C(50)-C(49)-P(4)  | 119.40(14) |
| C(35)-C(34)-H(34) | 120.3      | C(54)-C(49)-P(4)  | 121.75(15) |
| C(34)-C(35)-H(35) | 119.8      | C(54)-C(49)-C(50) | 118.55(17) |
| C(36)-C(35)-C(34) | 120.4(2)   | C(49)-C(50)-H(50) | 119.7      |
| C(36)-C(35)-H(35) | 119.8      | C(49)-C(50)-C(51) | 120.58(19) |
| C(31)-C(36)-H(36) | 119.7      | C(51)-C(50)-H(50) | 119.7      |
| C(35)-C(36)-C(31) | 120.65(18) | C(50)-C(51)-H(51) | 119.9      |
| C(35)-C(36)-H(36) | 119.7      | C(52)-C(51)-C(50) | 120.2(2)   |
| C(38)-C(37)-P(3)  | 121.13(14) | C(52)-C(51)-H(51) | 119.9      |
| C(42)-C(37)-P(3)  | 119.80(13) | C(51)-C(52)-H(52) | 120.1      |
| C(42)-C(37)-C(38) | 119.07(16) | C(51)-C(52)-C(53) | 119.76(19) |
| C(37)-C(38)-H(38) | 119.9      | C(53)-C(52)-H(52) | 120.1      |
| C(39)-C(38)-C(37) | 120.26(18) | C(52)-C(53)-H(53) | 119.8      |
| C(39)-C(38)-H(38) | 119.9      | C(52)-C(53)-C(54) | 120.4(2)   |
| C(38)-C(39)-H(39) | 120.1      | C(54)-C(53)-H(53) | 119.8      |
| C(40)-C(39)-C(38) | 119.88(18) | C(49)-C(54)-H(54) | 119.8      |
| C(40)-C(39)-H(39) | 120.1      | C(53)-C(54)-C(49) | 120.4(2)   |
| C(39)-C(40)-H(40) | 119.7      | C(53)-C(54)-H(54) | 119.8      |
| C(41)-C(40)-C(39) | 120.53(17) | C(56)-C(55)-C(60) | 115.57(14) |
| C(41)-C(40)-H(40) | 119.7      | C(56)-C(55)-B(1)  | 125.28(14) |
| C(40)-C(41)-H(41) | 120.2      | C(60)-C(55)-B(1)  | 118.46(14) |
| C(40)-C(41)-C(42) | 119.54(18) | C(55)-C(56)-H(56) | 119.0      |
| C(42)-C(41)-H(41) | 120.2      | C(55)-C(56)-C(57) | 121.99(15) |
| C(37)-C(42)-C(41) | 120.70(17) | C(57)-C(56)-H(56) | 119.0      |
| C(37)-C(42)-H(42) | 119.7      | C(56)-C(57)-C(61) | 119.36(15) |
| C(41)-C(42)-H(42) | 119.7      | C(58)-C(57)-C(56) | 120.97(15) |
| C(44)-C(43)-P(4)  | 123.59(15) | C(58)-C(57)-C(61) | 119.56(15) |
| C(44)-C(43)-C(48) | 118.68(17) | C(57)-C(58)-H(58) | 121.1      |
| C(48)-C(43)-P(4)  | 117.69(14) | C(59)-C(58)-C(57) | 117.87(15) |
| C(43)-C(44)-H(44) | 120.1      | C(59)-C(58)-H(58) | 121.1      |
| C(43)-C(44)-C(45) | 119.8(2)   | C(58)-C(59)-C(60) | 120.94(15) |
| C(45)-C(44)-H(44) | 120.1      | C(58)-C(59)-C(62) | 120.17(15) |
| C(44)-C(45)-H(45) | 119.6      | C(60)-C(59)-C(62) | 118.89(15) |
| C(46)-C(45)-C(44) | 120.8(2)   | C(55)-C(60)-H(60) | 118.7      |
| C(46)-C(45)-H(45) | 119.6      | C(59)-C(60)-C(55) | 122.60(15) |
| C(45)-C(46)-H(46) | 120.1      | C(59)-C(60)-H(60) | 118.7      |
| C(45)-C(46)-C(47) | 119.83(19) | F(1)-C(61)-C(57)  | 112.35(14) |
| C(47)-C(46)-H(46) | 120.1      | F(2)-C(61)-F(1)   | 105.84(13) |
| C(46)-C(47)-H(47) | 120.2      | F(2)-C(61)-F(3)   | 106.38(14) |

|                     |            |                     |            |
|---------------------|------------|---------------------|------------|
| F(2)-C(61)-C(57)    | 112.66(14) | F(12B)-C(70)-C(67)  | 111.2(12)  |
| F(3)-C(61)-F(1)     | 106.17(14) | C(72)-C(71)-B(1)    | 122.43(14) |
| F(3)-C(61)-C(57)    | 112.89(14) | C(76)-C(71)-C(72)   | 115.40(15) |
| F(4)-C(62)-F(6)     | 105.92(14) | C(76)-C(71)-B(1)    | 121.66(14) |
| F(4)-C(62)-C(59)    | 112.96(15) | C(71)-C(72)-H(72)   | 118.9      |
| F(5)-C(62)-F(4)     | 107.17(15) | C(73)-C(72)-C(71)   | 122.16(15) |
| F(5)-C(62)-F(6)     | 105.65(15) | C(73)-C(72)-H(72)   | 118.9      |
| F(5)-C(62)-C(59)    | 112.64(14) | C(72)-C(73)-C(77)   | 119.36(15) |
| F(6)-C(62)-C(59)    | 111.97(15) | C(74)-C(73)-C(72)   | 121.21(15) |
| C(64)-C(63)-B(1)    | 122.68(14) | C(74)-C(73)-C(77)   | 119.30(15) |
| C(68)-C(63)-C(64)   | 115.54(15) | C(73)-C(74)-H(74)   | 121.1      |
| C(68)-C(63)-B(1)    | 121.77(14) | C(73)-C(74)-C(75)   | 117.74(15) |
| C(63)-C(64)-H(64)   | 118.9      | C(75)-C(74)-H(74)   | 121.1      |
| C(65)-C(64)-C(63)   | 122.21(15) | C(74)-C(75)-C(76)   | 121.00(16) |
| C(65)-C(64)-H(64)   | 118.9      | C(74)-C(75)-C(78)   | 119.54(16) |
| C(64)-C(65)-C(66)   | 121.03(15) | C(76)-C(75)-C(78)   | 119.46(16) |
| C(64)-C(65)-C(69)   | 120.95(15) | C(71)-C(76)-H(76)   | 118.8      |
| C(66)-C(65)-C(69)   | 117.95(15) | C(75)-C(76)-C(71)   | 122.45(15) |
| C(65)-C(66)-H(66)   | 121.1      | C(75)-C(76)-H(76)   | 118.8      |
| C(67)-C(66)-C(65)   | 117.84(16) | F(13)-C(77)-F(14)   | 107.5(4)   |
| C(67)-C(66)-H(66)   | 121.1      | F(13)-C(77)-F(15)   | 105.8(2)   |
| C(66)-C(67)-C(68)   | 121.03(15) | F(13)-C(77)-C(73)   | 114.40(18) |
| C(66)-C(67)-C(70)   | 120.28(15) | F(13B)-C(77)-C(73)  | 105.2(5)   |
| C(68)-C(67)-C(70)   | 118.69(15) | F(14)-C(77)-F(15)   | 104.9(4)   |
| C(63)-C(68)-H(68)   | 118.9      | F(14)-C(77)-C(73)   | 112.9(4)   |
| C(67)-C(68)-C(63)   | 122.25(15) | F(14B)-C(77)-F(13B) | 105.7(9)   |
| C(67)-C(68)-H(68)   | 118.9      | F(14B)-C(77)-F(15B) | 112.2(18)  |
| F(7)-C(69)-F(8)     | 107.62(15) | F(14B)-C(77)-C(73)  | 115.6(8)   |
| F(7)-C(69)-F(9)     | 106.10(14) | F(15)-C(77)-C(73)   | 110.8(2)   |
| F(7)-C(69)-C(65)    | 112.90(15) | F(15B)-C(77)-F(13B) | 102.2(17)  |
| F(8)-C(69)-F(9)     | 104.83(15) | F(15B)-C(77)-C(73)  | 114(2)     |
| F(8)-C(69)-C(65)    | 112.73(14) | F(16)-C(78)-C(75)   | 109.6(3)   |
| F(9)-C(69)-C(65)    | 112.10(15) | F(16B)-C(78)-F(17B) | 110.5(5)   |
| F(10)-C(70)-F(11)   | 104.7(3)   | F(16B)-C(78)-F(18B) | 104.7(3)   |
| F(10)-C(70)-C(67)   | 113.8(2)   | F(16B)-C(78)-C(75)  | 115.9(3)   |
| F(10B)-C(70)-F(11B) | 111.5(10)  | F(17)-C(78)-F(16)   | 104.6(4)   |
| F(10B)-C(70)-F(12B) | 107.2(12)  | F(17)-C(78)-C(75)   | 114.1(5)   |
| F(10B)-C(70)-C(67)  | 114.0(11)  | F(17B)-C(78)-F(18B) | 101.7(4)   |
| F(11)-C(70)-C(67)   | 111.6(3)   | F(17B)-C(78)-C(75)  | 113.1(5)   |
| F(11B)-C(70)-F(12B) | 100.5(11)  | F(18)-C(78)-F(16)   | 104.4(3)   |
| F(11B)-C(70)-C(67)  | 111.4(8)   | F(18)-C(78)-F(17)   | 108.8(4)   |
| F(12)-C(70)-F(10)   | 108.5(3)   | F(18)-C(78)-C(75)   | 114.5(3)   |
| F(12)-C(70)-F(11)   | 104.7(3)   | F(18B)-C(78)-C(75)  | 109.7(3)   |
| F(12)-C(70)-C(67)   | 112.8(3)   | C(80)-C(79)-B(1)    | 122.06(14) |

|                     |            |
|---------------------|------------|
| C(84)-C(79)-C(80)   | 115.58(14) |
| C(84)-C(79)-B(1)    | 122.36(14) |
| C(79)-C(80)-H(80)   | 119.0      |
| C(81)-C(80)-C(79)   | 121.93(15) |
| C(81)-C(80)-H(80)   | 119.0      |
| C(80)-C(81)-C(85)   | 118.48(15) |
| C(82)-C(81)-C(80)   | 121.36(15) |
| C(82)-C(81)-C(85)   | 120.07(15) |
| C(81)-C(82)-H(82)   | 121.1      |
| C(81)-C(82)-C(83)   | 117.72(15) |
| C(83)-C(82)-H(82)   | 121.1      |
| C(82)-C(83)-C(84)   | 120.90(15) |
| C(82)-C(83)-C(86)   | 119.96(15) |
| C(84)-C(83)-C(86)   | 119.05(15) |
| C(79)-C(84)-H(84)   | 118.8      |
| C(83)-C(84)-C(79)   | 122.34(15) |
| C(83)-C(84)-H(84)   | 118.8      |
| F(19)-C(85)-C(81)   | 111.71(14) |
| F(20)-C(85)-F(19)   | 105.74(15) |
| F(20)-C(85)-F(21)   | 105.97(14) |
| F(20)-C(85)-C(81)   | 113.10(15) |
| F(21)-C(85)-F(19)   | 106.91(15) |
| F(21)-C(85)-C(81)   | 112.88(14) |
| F(22)-C(86)-F(24)   | 105.11(17) |
| F(22)-C(86)-C(83)   | 113.64(15) |
| F(22B)-C(86)-F(23B) | 100.7(18)  |
| F(22B)-C(86)-F(24B) | 112.0(17)  |
| F(22B)-C(86)-C(83)  | 108.2(11)  |
| F(23)-C(86)-F(22)   | 107.01(18) |
| F(23)-C(86)-F(24)   | 105.13(17) |
| F(23)-C(86)-C(83)   | 112.59(15) |
| F(23B)-C(86)-C(83)  | 109.6(8)   |
| F(24)-C(86)-C(83)   | 112.68(15) |
| F(24B)-C(86)-F(23B) | 114.2(18)  |
| F(24B)-C(86)-C(83)  | 111.4(10)  |
| C(55)-B(1)-C(71)    | 101.21(12) |
| C(63)-B(1)-C(55)    | 110.48(13) |
| C(63)-B(1)-C(71)    | 111.48(13) |
| C(63)-B(1)-C(79)    | 108.95(13) |
| C(79)-B(1)-C(55)    | 113.22(13) |
| C(79)-B(1)-C(71)    | 111.37(13) |

---

**Table S9.** Anisotropic displacement parameters ( $\text{\AA}^2 \times 10^3$ ) for RBabu\_MP-05-007. The anisotropic displacement factor exponent takes the form:  $-2 \text{ h}^2 \text{ a}^2 \text{ U}^{11} + \dots + 2 \text{ h k a}^* \text{ b}^* \text{ U}^{12}$  ]

|       | U11   | U22   | U33   | U23    | U13   | U12   |
|-------|-------|-------|-------|--------|-------|-------|
| Co(1) | 17(1) | 16(1) | 19(1) | 1(1)   | 4(1)  | 0(1)  |
| P(1)  | 20(1) | 18(1) | 20(1) | 2(1)   | 4(1)  | -2(1) |
| P(2)  | 17(1) | 18(1) | 23(1) | 0(1)   | 4(1)  | -1(1) |
| P(3)  | 20(1) | 16(1) | 26(1) | 1(1)   | 6(1)  | 0(1)  |
| P(4)  | 22(1) | 23(1) | 21(1) | 4(1)   | 6(1)  | 3(1)  |
| C(1)  | 27(1) | 26(1) | 20(1) | 2(1)   | 4(1)  | -3(1) |
| C(2)  | 24(1) | 26(1) | 23(1) | 3(1)   | 1(1)  | 1(1)  |
| C(3)  | 20(1) | 26(1) | 22(1) | -2(1)  | 3(1)  | -1(1) |
| C(4)  | 30(1) | 25(1) | 31(1) | 10(1)  | 11(1) | 4(1)  |
| C(5)  | 33(1) | 23(1) | 33(1) | 9(1)   | 12(1) | 7(1)  |
| C(6)  | 28(1) | 18(1) | 36(1) | 4(1)   | 10(1) | 2(1)  |
| C(7)  | 23(1) | 19(1) | 25(1) | 5(1)   | 6(1)  | -3(1) |
| C(8)  | 29(1) | 32(1) | 26(1) | 0(1)   | 9(1)  | -6(1) |
| C(9)  | 31(1) | 40(1) | 37(1) | 1(1)   | 16(1) | -6(1) |
| C(10) | 23(1) | 34(1) | 45(1) | 8(1)   | 11(1) | -5(1) |
| C(11) | 27(1) | 26(1) | 38(1) | 2(1)   | 2(1)  | -6(1) |
| C(12) | 27(1) | 22(1) | 30(1) | 1(1)   | 6(1)  | -3(1) |
| C(13) | 20(1) | 19(1) | 29(1) | 1(1)   | 1(1)  | -2(1) |
| C(14) | 34(1) | 23(1) | 38(1) | 5(1)   | 2(1)  | 0(1)  |
| C(15) | 40(1) | 21(1) | 58(1) | 5(1)   | -4(1) | 3(1)  |
| C(16) | 28(1) | 27(1) | 61(1) | -14(1) | -5(1) | 7(1)  |
| C(17) | 31(1) | 37(1) | 42(1) | -13(1) | 6(1)  | 2(1)  |
| C(18) | 29(1) | 26(1) | 31(1) | -2(1)  | 5(1)  | 1(1)  |
| C(19) | 20(1) | 18(1) | 27(1) | 3(1)   | 5(1)  | -1(1) |
| C(20) | 24(1) | 30(1) | 33(1) | -5(1)  | 2(1)  | 2(1)  |
| C(21) | 36(1) | 37(1) | 40(1) | -10(1) | 9(1)  | 7(1)  |
| C(22) | 29(1) | 31(1) | 44(1) | 2(1)   | 13(1) | 8(1)  |
| C(23) | 22(1) | 30(1) | 36(1) | 9(1)   | 6(1)  | 3(1)  |
| C(24) | 24(1) | 26(1) | 27(1) | 3(1)   | 4(1)  | 1(1)  |
| C(25) | 15(1) | 21(1) | 32(1) | 1(1)   | 2(1)  | 0(1)  |
| C(26) | 30(1) | 24(1) | 38(1) | 0(1)   | 13(1) | -1(1) |
| C(27) | 30(1) | 28(1) | 45(1) | 6(1)   | 15(1) | -1(1) |
| C(28) | 23(1) | 22(1) | 51(1) | 6(1)   | 5(1)  | -4(1) |
| C(29) | 33(1) | 22(1) | 42(1) | -2(1)  | -2(1) | -2(1) |
| C(30) | 26(1) | 24(1) | 32(1) | 1(1)   | 0(1)  | -1(1) |
| C(31) | 21(1) | 20(1) | 30(1) | -2(1)  | 6(1)  | 2(1)  |
| C(32) | 30(1) | 24(1) | 36(1) | 0(1)   | 1(1)  | -2(1) |
| C(33) | 40(1) | 27(1) | 43(1) | -6(1)  | -6(1) | -3(1) |
| C(34) | 45(1) | 38(1) | 33(1) | -10(1) | -2(1) | 5(1)  |



|        |         |        |       |        |        |        |
|--------|---------|--------|-------|--------|--------|--------|
| C(35)  | 43(1)   | 43(1)  | 30(1) | -3(1)  | 10(1)  | 1(1)   |
| C(36)  | 36(1)   | 28(1)  | 32(1) | -5(1)  | 10(1)  | -6(1)  |
| C(37)  | 22(1)   | 21(1)  | 27(1) | 4(1)   | 7(1)   | 3(1)   |
| C(38)  | 28(1)   | 23(1)  | 44(1) | -3(1)  | 8(1)   | 3(1)   |
| C(39)  | 29(1)   | 32(1)  | 60(1) | 1(1)   | 15(1)  | 11(1)  |
| C(40)  | 20(1)   | 43(1)  | 53(1) | 7(1)   | 6(1)   | 5(1)   |
| C(41)  | 25(1)   | 36(1)  | 36(1) | 2(1)   | 1(1)   | -3(1)  |
| C(42)  | 24(1)   | 25(1)  | 26(1) | 1(1)   | 7(1)   | 2(1)   |
| C(43)  | 25(1)   | 36(1)  | 18(1) | -2(1)  | 6(1)   | 2(1)   |
| C(44)  | 30(1)   | 47(1)  | 23(1) | 2(1)   | 9(1)   | 7(1)   |
| C(45)  | 28(1)   | 72(2)  | 26(1) | -3(1)  | 2(1)   | 12(1)  |
| C(46)  | 28(1)   | 71(2)  | 32(1) | -17(1) | 6(1)   | -5(1)  |
| C(47)  | 36(1)   | 51(1)  | 32(1) | -13(1) | 9(1)   | -10(1) |
| C(48)  | 31(1)   | 38(1)  | 24(1) | -5(1)  | 6(1)   | -2(1)  |
| C(49)  | 28(1)   | 32(1)  | 19(1) | 6(1)   | 6(1)   | 8(1)   |
| C(50)  | 31(1)   | 37(1)  | 26(1) | 0(1)   | 4(1)   | 7(1)   |
| C(51)  | 45(1)   | 42(1)  | 28(1) | -3(1)  | 6(1)   | 15(1)  |
| C(52)  | 53(1)   | 52(1)  | 31(1) | 11(1)  | 22(1)  | 24(1)  |
| C(53)  | 48(1)   | 51(1)  | 48(1) | 17(1)  | 31(1)  | 13(1)  |
| C(54)  | 41(1)   | 35(1)  | 41(1) | 9(1)   | 23(1)  | 6(1)   |
| F(1)   | 35(1)   | 21(1)  | 42(1) | 2(1)   | 8(1)   | -6(1)  |
| F(2)   | 27(1)   | 33(1)  | 32(1) | -4(1)  | -2(1)  | -4(1)  |
| F(3)   | 42(1)   | 48(1)  | 39(1) | -26(1) | 22(1)  | -18(1) |
| F(4)   | 26(1)   | 30(1)  | 44(1) | -5(1)  | 15(1)  | 4(1)   |
| F(5)   | 20(1)   | 82(1)  | 46(1) | -28(1) | 4(1)   | -3(1)  |
| F(6)   | 37(1)   | 28(1)  | 64(1) | -6(1)  | 32(1)  | -6(1)  |
| F(7)   | 62(1)   | 36(1)  | 19(1) | 0(1)   | 4(1)   | -11(1) |
| F(8)   | 33(1)   | 79(1)  | 41(1) | 21(1)  | 16(1)  | 1(1)   |
| F(9)   | 59(1)   | 27(1)  | 31(1) | 8(1)   | 4(1)   | 0(1)   |
| F(10)  | 100(3)  | 45(2)  | 32(1) | -9(1)  | 6(2)   | -44(2) |
| F(10B) | 52(5)   | 78(11) | 35(7) | -13(5) | -11(4) | 15(6)  |
| F(11)  | 49(1)   | 43(2)  | 23(2) | -4(1)  | -7(1)  | 3(1)   |
| F(11B) | 109(12) | 21(3)  | 35(4) | -12(2) | 12(7)  | -18(4) |
| F(12)  | 44(1)   | 68(3)  | 37(2) | -27(2) | 1(1)   | 13(2)  |
| F(12B) | 67(6)   | 51(9)  | 37(7) | -21(5) | 31(6)  | -15(5) |
| F(13)  | 24(1)   | 64(2)  | 44(1) | 23(1)  | -5(1)  | -16(1) |
| F(13B) | 24(1)   | 64(2)  | 44(1) | 23(1)  | -5(1)  | -16(1) |
| F(14)  | 24(2)   | 35(1)  | 45(2) | 0(1)   | -6(1)  | 7(1)   |
| F(14B) | 36(5)   | 55(5)  | 82(8) | -34(6) | -16(7) | -3(5)  |
| F(15)  | 39(1)   | 40(1)  | 37(1) | -13(1) | -5(1)  | -5(1)  |
| F(15B) | 21(5)   | 52(7)  | 37(8) | 18(7)  | 1(5)   | 4(6)   |
| F(16)  | 104(3)  | 23(1)  | 62(2) | 6(1)   | 30(2)  | -11(2) |
| F(16B) | 95(3)   | 43(2)  | 86(2) |        | 35(2)  | -32(2) |
| F(17)  | 51(3)   | 42(3)  | 45(1) | -14(2) | 14(1)  | -2(2)  |

13(1)

|        |       |        |        |        |        |        |
|--------|-------|--------|--------|--------|--------|--------|
| F(17B) | 38(2) | 54(4)  | 54(1)  | 34(2)  | 8(1)   | 0(2)   |
| F(18)  | 33(1) | 86(4)  | 107(3) | 68(3)  | -10(2) | -19(1) |
| F(18B) | 31(1) | 53(2)  | 60(2)  | 28(2)  | 11(1)  | -4(1)  |
| F(19)  | 56(1) | 65(1)  | 36(1)  | 22(1)  | 27(1)  | 28(1)  |
| F(20)  | 49(1) | 56(1)  | 34(1)  | -19(1) | 17(1)  | -3(1)  |
| F(21)  | 22(1) | 83(1)  | 33(1)  | -5(1)  | 13(1)  | -6(1)  |
| F(22)  | 22(1) | 112(2) | 32(1)  | 7(1)   | -4(1)  | -14(1) |
| F(22B) | 27(8) | 73(6)  | 42(11) | -1(9)  | -7(7)  | 18(7)  |
| F(23)  | 87(1) | 53(1)  | 44(1)  | -27(1) | -31(1) | 28(1)  |
| F(23B) | 57(1) | 55(1)  | 28(1)  | 16(1)  | -10(1) | -17(1) |
| F(24)  | 57(1) | 55(1)  | 28(1)  | 16(1)  | -10(1) | -17(1) |
| F(24B) | 31(8) | 92(14) | 24(7)  | 17(9)  | 0(6)   | -3(8)  |
| C(55)  | 20(1) | 20(1)  | 18(1)  | 1(1)   | 4(1)   | 1(1)   |
| C(56)  | 19(1) | 21(1)  | 21(1)  | 1(1)   | 5(1)   | -1(1)  |
| C(57)  | 24(1) | 19(1)  | 19(1)  | 0(1)   | 4(1)   | -1(1)  |
| C(58)  | 26(1) | 21(1)  | 22(1)  | -2(1)  | 9(1)   | 1(1)   |
| C(59)  | 21(1) | 24(1)  | 22(1)  | 0(1)   | 5(1)   | 1(1)   |
| C(60)  | 21(1) | 22(1)  | 21(1)  | -2(1)  | 5(1)   | -3(1)  |
| C(61)  | 28(1) | 25(1)  | 26(1)  | -4(1)  | 11(1)  | -3(1)  |
| C(62)  | 26(1) | 32(1)  | 33(1)  | -10(1) | 11(1)  | -1(1)  |
| C(63)  | 15(1) | 22(1)  | 21(1)  | -1(1)  | 4(1)   | 2(1)   |
| C(64)  | 20(1) | 23(1)  | 19(1)  | -2(1)  | 2(1)   | 1(1)   |
| C(65)  | 19(1) | 25(1)  | 21(1)  | 1(1)   | 2(1)   | 2(1)   |
| C(66)  | 23(1) | 22(1)  | 25(1)  | 1(1)   | 3(1)   | -2(1)  |
| C(67)  | 22(1) | 22(1)  | 22(1)  | -2(1)  | 2(1)   | 0(1)   |
| C(68)  | 20(1) | 22(1)  | 20(1)  | 1(1)   | 6(1)   | 1(1)   |
| C(69)  | 30(1) | 28(1)  | 25(1)  | 4(1)   | 3(1)   | -2(1)  |
| C(70)  | 38(1) | 25(1)  | 26(1)  | -3(1)  | 3(1)   | -5(1)  |
| C(71)  | 19(1) | 21(1)  | 19(1)  | -4(1)  | 6(1)   | 0(1)   |
| C(72)  | 21(1) | 20(1)  | 20(1)  | 0(1)   | 5(1)   | 0(1)   |
| C(73)  | 20(1) | 24(1)  | 20(1)  | -2(1)  | 3(1)   | 1(1)   |
| C(74)  | 26(1) | 23(1)  | 23(1)  | 2(1)   | 3(1)   | 3(1)   |
| C(75)  | 25(1) | 21(1)  | 28(1)  | 1(1)   | 7(1)   | 1(1)   |
| C(76)  | 18(1) | 21(1)  | 24(1)  | -2(1)  | 3(1)   | -1(1)  |
| C(77)  | 24(1) | 29(1)  | 32(1)  | 4(1)   | 0(1)   | -1(1)  |
| C(78)  | 32(1) | 29(1)  | 45(1)  | 12(1)  | 3(1)   | -7(1)  |
| C(79)  | 19(1) | 16(1)  | 22(1)  | -1(1)  | 4(1)   | 0(1)   |
| C(80)  | 20(1) | 21(1)  | 20(1)  | -2(1)  | 3(1)   | 1(1)   |
| C(81)  | 22(1) | 21(1)  | 23(1)  | -1(1)  | 6(1)   | 2(1)   |
| C(82)  | 17(1) | 21(1)  | 27(1)  | 0(1)   | 5(1)   | 1(1)   |
| C(83)  | 21(1) | 19(1)  | 22(1)  | 1(1)   | 1(1)   | 1(1)   |
| C(84)  | 22(1) | 19(1)  | 20(1)  | 0(1)   | 6(1)   | 1(1)   |
| C(85)  | 21(1) | 38(1)  | 25(1)  | 0(1)   | 7(1)   | 4(1)   |
| C(86)  | 24(1) | 32(1)  | 25(1)  | 1(1)   | 1(1)   | -1(1)  |

B(1) 18(1) 20(1) 18(1) -1(1) 4(1) -1(1)

---

Table S10. Hydrogen coordinates ( $\times 10^4$ ) and isotropic displacement parameters ( $\text{\AA}^2 \times 10^{-3}$ ) for RBabu\_MP-05-007.

|       | x     | y     | z    | U(eq) |
|-------|-------|-------|------|-------|
| H(1A) | 1718  | 2279  | 4644 | 29    |
| H(1B) | 1912  | 1054  | 4658 | 29    |
| H(2A) | 3151  | 1443  | 4430 | 30    |
| H(2B) | 3162  | 1838  | 4835 | 30    |
| H(3A) | 3675  | 3228  | 4584 | 27    |
| H(3B) | 2739  | 3559  | 4560 | 27    |
| H(4A) | 2067  | 5017  | 3089 | 34    |
| H(4B) | 1334  | 4917  | 2745 | 34    |
| H(5A) | 891   | 6152  | 3100 | 35    |
| H(5B) | 389   | 5128  | 3164 | 35    |
| H(6A) | 972   | 6152  | 3708 | 32    |
| H(6B) | 1843  | 5695  | 3667 | 32    |
| H(8)  | 347   | 2058  | 4534 | 34    |
| H(9)  | -1064 | 1876  | 4492 | 42    |
| H(10) | -1851 | 1023  | 3994 | 40    |
| H(11) | -1210 | 257   | 3557 | 37    |
| H(12) | 198   | 429   | 3598 | 31    |
| H(14) | 1694  | -536  | 4344 | 39    |
| H(15) | 2115  | -2108 | 4130 | 50    |
| H(16) | 2512  | -2193 | 3569 | 49    |
| H(17) | 2484  | -692  | 3215 | 44    |
| H(18) | 2066  | 894   | 3427 | 34    |
| H(20) | 3194  | 1884  | 3383 | 35    |
| H(21) | 4270  | 928   | 3226 | 45    |
| H(22) | 5550  | 915   | 3610 | 41    |
| H(23) | 5758  | 1875  | 4148 | 35    |
| H(24) | 4686  | 2814  | 4310 | 31    |
| H(26) | 3552  | 4281  | 3404 | 36    |
| H(27) | 4013  | 5950  | 3296 | 40    |
| H(28) | 4162  | 7209  | 3755 | 39    |
| H(29) | 3879  | 6785  | 4320 | 41    |
| H(30) | 3416  | 5111  | 4430 | 34    |
| H(32) | 2016  | 6111  | 4267 | 37    |
| H(33) | 2280  | 6719  | 4862 | 47    |
| H(34) | 1726  | 5873  | 5308 | 48    |
| H(35) | 890   | 4411  | 5153 | 46    |
| H(36) | 637   | 3779  | 4561 | 38    |
| H(38) | -206  | 5704  | 4076 | 38    |

|       |       |       |      |    |
|-------|-------|-------|------|----|
| H(39) | -1633 | 5633  | 3980 | 47 |
| H(40) | -2332 | 4252  | 3653 | 46 |
| H(41) | -1614 | 2938  | 3420 | 39 |
| H(42) | -182  | 2980  | 3530 | 30 |
| H(44) | 82    | 4300  | 2550 | 39 |
| H(45) | -1248 | 3749  | 2301 | 51 |
| H(46) | -1718 | 2129  | 2450 | 53 |
| H(47) | -860  | 1036  | 2852 | 47 |
| H(48) | 458   | 1587  | 3111 | 37 |
| H(50) | 1513  | 1383  | 2751 | 38 |
| H(51) | 2436  | 538   | 2452 | 46 |
| H(52) | 3579  | 1421  | 2335 | 52 |
| H(53) | 3772  | 3173  | 2493 | 55 |
| H(54) | 2843  | 4038  | 2783 | 44 |
| H(56) | 7687  | 9536  | 4340 | 24 |
| H(58) | 5780  | 10565 | 4774 | 27 |
| H(60) | 5506  | 8075  | 4098 | 25 |
| H(64) | 6651  | 6664  | 4425 | 25 |
| H(66) | 5731  | 4012  | 3912 | 28 |
| H(68) | 6479  | 6386  | 3341 | 25 |
| H(72) | 5395  | 7732  | 3403 | 24 |
| H(74) | 5312  | 10144 | 2697 | 29 |
| H(76) | 7368  | 9590  | 3448 | 26 |
| H(80) | 7932  | 7816  | 3338 | 24 |
| H(82) | 10233 | 8039  | 3934 | 26 |
| H(84) | 8279  | 7903  | 4431 | 24 |

---

Table S11. Crystal data and structure refinement for RBabu2903.

|                                   |                                             |                              |
|-----------------------------------|---------------------------------------------|------------------------------|
| Report date                       | 2019-12-18                                  |                              |
| Identification code               | RBabu2903                                   |                              |
| Empirical formula                 | C58 H60 Br3 Co O P4 Zn                      |                              |
| Molecular formula                 | C54 H52 Co P4, C4 H8 Br3 O Zn               |                              |
| Formula weight                    | 1260.97                                     |                              |
| Temperature                       | 150 K                                       |                              |
| Wavelength                        | 0.71073 Å                                   |                              |
| Crystal system                    | Monoclinic                                  |                              |
| Space group                       | P 1 21/c 1                                  |                              |
| Unit cell dimensions              | a = 14.1589(9) Å                            | $\alpha = 90^\circ$ .        |
|                                   | b = 17.0352(10) Å                           | $\beta = 100.025(3)^\circ$ . |
|                                   | c = 24.3773(14) Å                           | $\gamma = 90^\circ$ .        |
| Volume                            | 5790.0(6) Å <sup>3</sup>                    |                              |
| Z                                 | 4                                           |                              |
| Density (calculated)              | 1.447 Mg/m <sup>3</sup>                     |                              |
| Absorption coefficient            | 2.919 mm <sup>-1</sup>                      |                              |
| F(000)                            | 2552                                        |                              |
| Crystal size                      | 0.19 x 0.12 x 0.08 mm <sup>3</sup>          |                              |
| Crystal color, habit              | Bluish Green Plate                          |                              |
| Theta range for data collection   | 1.887 to 27.585°.                           |                              |
| Index ranges                      | -18 ≤ h ≤ 18, -22 ≤ k ≤ 22, -31 ≤ l ≤ 28    |                              |
| Reflections collected             | 103708                                      |                              |
| Independent reflections           | 13361 [R(int) = 0.0456, R(sigma) = 0.0354]  |                              |
| Completeness to theta = 25.000°   | 100.0 %                                     |                              |
| Absorption correction             | Semi-empirical from equivalents             |                              |
| Max. and min. transmission        | 0.2616 and 0.2153                           |                              |
| Refinement method                 | Full-matrix least-squares on F <sup>2</sup> |                              |
| Data / restraints / parameters    | 13361 / 0 / 617                             |                              |
| Goodness-of-fit on F <sup>2</sup> | 1.044                                       |                              |
| Final R indices [I > 2sigma(I)]   | R1 = 0.0359, wR2 = 0.0867                   |                              |
| R indices (all data)              | R1 = 0.0537, wR2 = 0.0929                   |                              |
| Extinction coefficient            | n/a                                         |                              |
| Largest diff. peak and hole       | 1.635 and -1.468 e.Å <sup>-3</sup>          |                              |

Table S12. Atomic coordinates ( $\times 10^4$ ) and equivalent isotropic displacement parameters ( $\text{\AA}^2 \times 10^3$ ) for RBabu2903.  $U(\text{eq})$  is defined as one third of the trace of the orthogonalized  $U^{ij}$  tensor.

|       | x       | y       | z       | $U(\text{eq})$ |
|-------|---------|---------|---------|----------------|
| Co(1) | 3174(1) | 7040(1) | 6041(1) | 16(1)          |
| P(1)  | 3490(1) | 8274(1) | 5772(1) | 18(1)          |
| P(2)  | 1745(1) | 6960(1) | 5442(1) | 21(1)          |
| P(3)  | 4596(1) | 6400(1) | 6320(1) | 19(1)          |
| P(4)  | 2895(1) | 7299(1) | 6915(1) | 19(1)          |
| C(1)  | 2423(2) | 8901(1) | 5653(1) | 23(1)          |
| C(2)  | 1629(2) | 8594(2) | 5192(1) | 28(1)          |
| C(3)  | 1070(2) | 7880(1) | 5353(1) | 27(1)          |
| C(4)  | 5301(2) | 6717(2) | 6986(1) | 23(1)          |
| C(5)  | 4711(2) | 6807(2) | 7452(1) | 24(1)          |
| C(6)  | 4031(2) | 7506(1) | 7382(1) | 22(1)          |
| C(7)  | 4379(2) | 8866(1) | 6227(1) | 19(1)          |
| C(8)  | 5330(2) | 8613(2) | 6316(1) | 24(1)          |
| C(9)  | 6029(2) | 9003(2) | 6681(1) | 31(1)          |
| C(10) | 5787(2) | 9652(2) | 6971(1) | 31(1)          |
| C(11) | 4851(2) | 9914(2) | 6878(1) | 30(1)          |
| C(12) | 4148(2) | 9532(2) | 6504(1) | 25(1)          |
| C(13) | 3924(2) | 8370(1) | 5109(1) | 21(1)          |
| C(14) | 4127(2) | 7710(2) | 4825(1) | 30(1)          |
| C(15) | 4466(2) | 7775(2) | 4325(1) | 39(1)          |
| C(16) | 4598(2) | 8500(2) | 4107(1) | 34(1)          |
| C(17) | 4398(2) | 9165(2) | 4385(1) | 34(1)          |
| C(18) | 4073(2) | 9099(2) | 4884(1) | 30(1)          |
| C(19) | 1928(2) | 6682(2) | 4744(1) | 27(1)          |
| C(20) | 1446(2) | 7029(2) | 4257(1) | 35(1)          |
| C(21) | 1653(2) | 6796(2) | 3744(1) | 46(1)          |
| C(22) | 2322(3) | 6218(2) | 3715(1) | 50(1)          |
| C(23) | 2788(2) | 5859(2) | 4192(1) | 47(1)          |
| C(24) | 2593(2) | 6097(2) | 4704(1) | 35(1)          |

|       |         |         |         |       |
|-------|---------|---------|---------|-------|
| C(25) | 879(2)  | 6230(2) | 5593(1) | 26(1) |
| C(26) | 52(2)   | 6427(2) | 5791(1) | 39(1) |
| C(27) | -532(2) | 5850(2) | 5946(2) | 49(1) |
| C(28) | -298(2) | 5073(2) | 5917(1) | 42(1) |
| C(29) | 502(2)  | 4866(2) | 5715(1) | 39(1) |
| C(30) | 1089(2) | 5441(2) | 5552(1) | 31(1) |
| C(31) | 5484(2) | 6360(1) | 5860(1) | 22(1) |
| C(32) | 5231(2) | 5983(2) | 5348(1) | 28(1) |
| C(33) | 5848(2) | 5960(2) | 4967(1) | 36(1) |
| C(34) | 6732(2) | 6315(2) | 5090(1) | 39(1) |
| C(35) | 6998(2) | 6688(2) | 5595(1) | 40(1) |
| C(36) | 6386(2) | 6710(2) | 5982(1) | 31(1) |
| C(37) | 4410(2) | 5352(1) | 6431(1) | 22(1) |
| C(38) | 3488(2) | 5054(2) | 6353(1) | 31(1) |
| C(39) | 3319(2) | 4261(2) | 6416(1) | 42(1) |
| C(40) | 4089(3) | 3758(2) | 6555(1) | 44(1) |
| C(41) | 5005(2) | 4046(2) | 6631(1) | 38(1) |
| C(42) | 5176(2) | 4834(2) | 6575(1) | 29(1) |
| C(43) | 2365(2) | 6557(1) | 7314(1) | 23(1) |
| C(44) | 1808(2) | 5961(2) | 7042(1) | 30(1) |
| C(45) | 1379(2) | 5410(2) | 7338(1) | 39(1) |
| C(46) | 1492(2) | 5453(2) | 7907(1) | 38(1) |
| C(47) | 2041(2) | 6045(2) | 8187(1) | 39(1) |
| C(48) | 2469(2) | 6598(2) | 7894(1) | 31(1) |
| C(49) | 2159(2) | 8152(2) | 7024(1) | 27(1) |
| C(50) | 1169(2) | 8090(2) | 6888(1) | 40(1) |
| C(51) | 596(2)  | 8734(2) | 6935(2) | 54(1) |
| C(52) | 1004(3) | 9446(2) | 7120(2) | 54(1) |
| C(53) | 1974(3) | 9514(2) | 7258(1) | 45(1) |
| C(54) | 2555(2) | 8866(2) | 7212(1) | 31(1) |
| Br(1) | 1321(1) | 2786(1) | 5568(1) | 44(1) |
| Br(2) | 154(1)  | 811(1)  | 6007(1) | 55(1) |
| Br(3) | 2883(1) | 1431(1) | 6688(1) | 43(1) |
| Zn(1) | 1556(1) | 1511(1) | 5953(1) | 28(1) |



|        |          |          |          |       |
|--------|----------|----------|----------|-------|
| O(1)   | 2052(1)  | 963(1)   | 5297(1)  | 33(1) |
| C(55)  | 2973(2)  | 1219(2)  | 5187(2)  | 49(1) |
| C(56)  | 2948(3)  | 1108(2)  | 4575(2)  | 64(1) |
| C(57)  | 2062(3)  | 629(3)   | 4379(2)  | 57(1) |
| C(57B) | 1770(20) | 1218(16) | 4327(10) | 57(1) |
| C(58)  | 1406(2)  | 878(2)   | 4766(1)  | 50(1) |

---

Table S13. Bond lengths [ $\text{\AA}$ ] and angles [ $^\circ$ ] for RBabu2903.

---

|            |           |
|------------|-----------|
| Co(1)-P(1) | 2.2703(7) |
| Co(1)-P(2) | 2.2833(7) |
| Co(1)-P(3) | 2.2866(7) |
| Co(1)-P(4) | 2.2770(7) |
| P(1)-C(1)  | 1.831(2)  |
| P(1)-C(7)  | 1.828(2)  |
| P(1)-C(13) | 1.833(2)  |
| P(2)-C(3)  | 1.830(3)  |
| P(2)-C(19) | 1.829(3)  |
| P(2)-C(25) | 1.828(3)  |
| P(3)-C(4)  | 1.833(2)  |
| P(3)-C(31) | 1.827(2)  |
| P(3)-C(37) | 1.831(2)  |
| P(4)-C(6)  | 1.835(2)  |
| P(4)-C(43) | 1.833(2)  |
| P(4)-C(49) | 1.833(3)  |
| C(1)-H(1A) | 0.9900    |
| C(1)-H(1B) | 0.9900    |
| C(1)-C(2)  | 1.536(3)  |
| C(2)-H(2A) | 0.9900    |
| C(2)-H(2B) | 0.9900    |
| C(2)-C(3)  | 1.537(3)  |
| C(3)-H(3A) | 0.9900    |
| C(3)-H(3B) | 0.9900    |
| C(4)-H(4A) | 0.9900    |
| C(4)-H(4B) | 0.9900    |
| C(4)-C(5)  | 1.530(3)  |
| C(5)-H(5A) | 0.9900    |
| C(5)-H(5B) | 0.9900    |
| C(5)-C(6)  | 1.522(3)  |
| C(6)-H(6A) | 0.9900    |
| C(6)-H(6B) | 0.9900    |
| C(7)-C(8)  | 1.394(3)  |

|             |          |
|-------------|----------|
| C(7)-C(12)  | 1.389(3) |
| C(8)-H(8)   | 0.9500   |
| C(8)-C(9)   | 1.381(4) |
| C(9)-H(9)   | 0.9500   |
| C(9)-C(10)  | 1.387(4) |
| C(10)-H(10) | 0.9500   |
| C(10)-C(11) | 1.379(4) |
| C(11)-H(11) | 0.9500   |
| C(11)-C(12) | 1.389(4) |
| C(12)-H(12) | 0.9500   |
| C(13)-C(14) | 1.378(3) |
| C(13)-C(18) | 1.389(3) |
| C(14)-H(14) | 0.9500   |
| C(14)-C(15) | 1.389(4) |
| C(15)-H(15) | 0.9500   |
| C(15)-C(16) | 1.370(4) |
| C(16)-H(16) | 0.9500   |
| C(16)-C(17) | 1.375(4) |
| C(17)-H(17) | 0.9500   |
| C(17)-C(18) | 1.378(4) |
| C(18)-H(18) | 0.9500   |
| C(19)-C(20) | 1.394(4) |
| C(19)-C(24) | 1.384(4) |
| C(20)-H(20) | 0.9500   |
| C(20)-C(21) | 1.391(4) |
| C(21)-H(21) | 0.9500   |
| C(21)-C(22) | 1.377(5) |
| C(22)-H(22) | 0.9500   |
| C(22)-C(23) | 1.378(5) |
| C(23)-H(23) | 0.9500   |
| C(23)-C(24) | 1.386(4) |
| C(24)-H(24) | 0.9500   |
| C(25)-C(26) | 1.383(4) |
| C(25)-C(30) | 1.383(4) |
| C(26)-H(26) | 0.9500   |
| C(26)-C(27) | 1.380(4) |

|             |          |
|-------------|----------|
| C(27)-H(27) | 0.9500   |
| C(27)-C(28) | 1.370(4) |
| C(28)-H(28) | 0.9500   |
| C(28)-C(29) | 1.358(4) |
| C(29)-H(29) | 0.9500   |
| C(29)-C(30) | 1.387(4) |
| C(30)-H(30) | 0.9500   |
| C(31)-C(32) | 1.394(4) |
| C(31)-C(36) | 1.395(4) |
| C(32)-H(32) | 0.9500   |
| C(32)-C(33) | 1.382(4) |
| C(33)-H(33) | 0.9500   |
| C(33)-C(34) | 1.376(4) |
| C(34)-H(34) | 0.9500   |
| C(34)-C(35) | 1.378(4) |
| C(35)-H(35) | 0.9500   |
| C(35)-C(36) | 1.389(4) |
| C(36)-H(36) | 0.9500   |
| C(37)-C(38) | 1.382(4) |
| C(37)-C(42) | 1.395(4) |
| C(38)-H(38) | 0.9500   |
| C(38)-C(39) | 1.386(4) |
| C(39)-H(39) | 0.9500   |
| C(39)-C(40) | 1.381(5) |
| C(40)-H(40) | 0.9500   |
| C(40)-C(41) | 1.369(5) |
| C(41)-H(41) | 0.9500   |
| C(41)-C(42) | 1.376(4) |
| C(42)-H(42) | 0.9500   |
| C(43)-C(44) | 1.381(4) |
| C(43)-C(48) | 1.398(4) |
| C(44)-H(44) | 0.9500   |
| C(44)-C(45) | 1.387(4) |
| C(45)-H(45) | 0.9500   |
| C(45)-C(46) | 1.369(4) |
| C(46)-H(46) | 0.9500   |

|               |            |
|---------------|------------|
| C(46)-C(47)   | 1.380(4)   |
| C(47)-H(47)   | 0.9500     |
| C(47)-C(48)   | 1.383(4)   |
| C(48)-H(48)   | 0.9500     |
| C(49)-C(50)   | 1.387(4)   |
| C(49)-C(54)   | 1.384(4)   |
| C(50)-H(50)   | 0.9500     |
| C(50)-C(51)   | 1.382(4)   |
| C(51)-H(51)   | 0.9500     |
| C(51)-C(52)   | 1.385(5)   |
| C(52)-H(52)   | 0.9500     |
| C(52)-C(53)   | 1.361(5)   |
| C(53)-H(53)   | 0.9500     |
| C(53)-C(54)   | 1.393(4)   |
| C(54)-H(54)   | 0.9500     |
| Br(1)-Zn(1)   | 2.3660(5)  |
| Br(2)-Zn(1)   | 2.3378(4)  |
| Br(3)-Zn(1)   | 2.3642(4)  |
| Zn(1)-O(1)    | 2.0785(19) |
| O(1)-C(55)    | 1.444(3)   |
| O(1)-C(58)    | 1.456(4)   |
| C(55)-H(55A)  | 0.9900     |
| C(55)-H(55B)  | 0.9900     |
| C(55)-C(56)   | 1.496(5)   |
| C(56)-H(56A)  | 0.9900     |
| C(56)-H(56B)  | 0.9900     |
| C(56)-H(56C)  | 0.9900     |
| C(56)-H(56D)  | 0.9900     |
| C(56)-C(57)   | 1.504(6)   |
| C(56)-C(57B)  | 1.69(3)    |
| C(57)-H(57A)  | 0.9900     |
| C(57)-H(57B)  | 0.9900     |
| C(57)-C(58)   | 1.495(5)   |
| C(57B)-H(57C) | 0.9900     |
| C(57B)-H(57D) | 0.9900     |
| C(57B)-C(58)  | 1.39(2)    |

|                  |            |
|------------------|------------|
| C(58)-H(58A)     | 0.9900     |
| C(58)-H(58B)     | 0.9900     |
| C(58)-H(58C)     | 0.9900     |
| C(58)-H(58D)     | 0.9900     |
| P(1)-Co(1)-P(2)  | 93.87(2)   |
| P(1)-Co(1)-P(3)  | 108.68(3)  |
| P(1)-Co(1)-P(4)  | 99.56(2)   |
| P(2)-Co(1)-P(3)  | 142.93(3)  |
| P(4)-Co(1)-P(2)  | 109.35(3)  |
| P(4)-Co(1)-P(3)  | 95.81(2)   |
| C(1)-P(1)-Co(1)  | 112.78(8)  |
| C(1)-P(1)-C(13)  | 101.70(11) |
| C(7)-P(1)-Co(1)  | 118.97(8)  |
| C(7)-P(1)-C(1)   | 103.70(11) |
| C(7)-P(1)-C(13)  | 100.59(10) |
| C(13)-P(1)-Co(1) | 116.78(8)  |
| C(3)-P(2)-Co(1)  | 114.27(9)  |
| C(19)-P(2)-Co(1) | 110.93(9)  |
| C(19)-P(2)-C(3)  | 105.50(12) |
| C(25)-P(2)-Co(1) | 117.55(8)  |
| C(25)-P(2)-C(3)  | 104.61(12) |
| C(25)-P(2)-C(19) | 102.70(12) |
| C(4)-P(3)-Co(1)  | 116.00(8)  |
| C(31)-P(3)-Co(1) | 119.96(8)  |
| C(31)-P(3)-C(4)  | 103.22(12) |
| C(31)-P(3)-C(37) | 100.72(11) |
| C(37)-P(3)-Co(1) | 111.53(8)  |
| C(37)-P(3)-C(4)  | 103.12(11) |
| C(6)-P(4)-Co(1)  | 109.98(8)  |
| C(43)-P(4)-Co(1) | 121.08(8)  |
| C(43)-P(4)-C(6)  | 101.51(11) |
| C(43)-P(4)-C(49) | 100.03(11) |
| C(49)-P(4)-Co(1) | 118.95(8)  |
| C(49)-P(4)-C(6)  | 102.54(12) |
| P(1)-C(1)-H(1A)  | 108.9      |

|                  |            |
|------------------|------------|
| P(1)-C(1)-H(1B)  | 108.9      |
| H(1A)-C(1)-H(1B) | 107.7      |
| C(2)-C(1)-P(1)   | 113.31(17) |
| C(2)-C(1)-H(1A)  | 108.9      |
| C(2)-C(1)-H(1B)  | 108.9      |
| C(1)-C(2)-H(2A)  | 108.5      |
| C(1)-C(2)-H(2B)  | 108.5      |
| C(1)-C(2)-C(3)   | 115.2(2)   |
| H(2A)-C(2)-H(2B) | 107.5      |
| C(3)-C(2)-H(2A)  | 108.5      |
| C(3)-C(2)-H(2B)  | 108.5      |
| P(2)-C(3)-H(3A)  | 108.5      |
| P(2)-C(3)-H(3B)  | 108.5      |
| C(2)-C(3)-P(2)   | 115.22(18) |
| C(2)-C(3)-H(3A)  | 108.5      |
| C(2)-C(3)-H(3B)  | 108.5      |
| H(3A)-C(3)-H(3B) | 107.5      |
| P(3)-C(4)-H(4A)  | 108.8      |
| P(3)-C(4)-H(4B)  | 108.8      |
| H(4A)-C(4)-H(4B) | 107.7      |
| C(5)-C(4)-P(3)   | 113.80(17) |
| C(5)-C(4)-H(4A)  | 108.8      |
| C(5)-C(4)-H(4B)  | 108.8      |
| C(4)-C(5)-H(5A)  | 108.7      |
| C(4)-C(5)-H(5B)  | 108.7      |
| H(5A)-C(5)-H(5B) | 107.6      |
| C(6)-C(5)-C(4)   | 114.4(2)   |
| C(6)-C(5)-H(5A)  | 108.7      |
| C(6)-C(5)-H(5B)  | 108.7      |
| P(4)-C(6)-H(6A)  | 109.0      |
| P(4)-C(6)-H(6B)  | 109.0      |
| C(5)-C(6)-P(4)   | 112.84(17) |
| C(5)-C(6)-H(6A)  | 109.0      |
| C(5)-C(6)-H(6B)  | 109.0      |
| H(6A)-C(6)-H(6B) | 107.8      |
| C(8)-C(7)-P(1)   | 117.97(18) |

|                   |            |
|-------------------|------------|
| C(12)-C(7)-P(1)   | 123.36(19) |
| C(12)-C(7)-C(8)   | 118.6(2)   |
| C(7)-C(8)-H(8)    | 119.4      |
| C(9)-C(8)-C(7)    | 121.1(2)   |
| C(9)-C(8)-H(8)    | 119.4      |
| C(8)-C(9)-H(9)    | 120.0      |
| C(8)-C(9)-C(10)   | 120.0(3)   |
| C(10)-C(9)-H(9)   | 120.0      |
| C(9)-C(10)-H(10)  | 120.4      |
| C(11)-C(10)-C(9)  | 119.3(2)   |
| C(11)-C(10)-H(10) | 120.4      |
| C(10)-C(11)-H(11) | 119.5      |
| C(10)-C(11)-C(12) | 121.0(2)   |
| C(12)-C(11)-H(11) | 119.5      |
| C(7)-C(12)-H(12)  | 120.0      |
| C(11)-C(12)-C(7)  | 120.0(2)   |
| C(11)-C(12)-H(12) | 120.0      |
| C(14)-C(13)-P(1)  | 120.17(18) |
| C(14)-C(13)-C(18) | 118.2(2)   |
| C(18)-C(13)-P(1)  | 121.64(19) |
| C(13)-C(14)-H(14) | 119.7      |
| C(13)-C(14)-C(15) | 120.7(2)   |
| C(15)-C(14)-H(14) | 119.7      |
| C(14)-C(15)-H(15) | 119.9      |
| C(16)-C(15)-C(14) | 120.3(3)   |
| C(16)-C(15)-H(15) | 119.9      |
| C(15)-C(16)-H(16) | 120.1      |
| C(15)-C(16)-C(17) | 119.8(2)   |
| C(17)-C(16)-H(16) | 120.1      |
| C(16)-C(17)-H(17) | 120.1      |
| C(16)-C(17)-C(18) | 119.9(3)   |
| C(18)-C(17)-H(17) | 120.1      |
| C(13)-C(18)-H(18) | 119.4      |
| C(17)-C(18)-C(13) | 121.2(2)   |
| C(17)-C(18)-H(18) | 119.4      |
| C(20)-C(19)-P(2)  | 123.7(2)   |



|                   |            |
|-------------------|------------|
| C(24)-C(19)-P(2)  | 117.3(2)   |
| C(24)-C(19)-C(20) | 119.0(3)   |
| C(19)-C(20)-H(20) | 120.2      |
| C(21)-C(20)-C(19) | 119.7(3)   |
| C(21)-C(20)-H(20) | 120.2      |
| C(20)-C(21)-H(21) | 119.8      |
| C(22)-C(21)-C(20) | 120.3(3)   |
| C(22)-C(21)-H(21) | 119.8      |
| C(21)-C(22)-H(22) | 119.8      |
| C(21)-C(22)-C(23) | 120.5(3)   |
| C(23)-C(22)-H(22) | 119.8      |
| C(22)-C(23)-H(23) | 120.4      |
| C(22)-C(23)-C(24) | 119.3(3)   |
| C(24)-C(23)-H(23) | 120.4      |
| C(19)-C(24)-C(23) | 121.2(3)   |
| C(19)-C(24)-H(24) | 119.4      |
| C(23)-C(24)-H(24) | 119.4      |
| C(26)-C(25)-P(2)  | 122.9(2)   |
| C(30)-C(25)-P(2)  | 119.1(2)   |
| C(30)-C(25)-C(26) | 117.9(2)   |
| C(25)-C(26)-H(26) | 119.8      |
| C(27)-C(26)-C(25) | 120.5(3)   |
| C(27)-C(26)-H(26) | 119.8      |
| C(26)-C(27)-H(27) | 119.6      |
| C(28)-C(27)-C(26) | 120.8(3)   |
| C(28)-C(27)-H(27) | 119.6      |
| C(27)-C(28)-H(28) | 120.2      |
| C(29)-C(28)-C(27) | 119.6(3)   |
| C(29)-C(28)-H(28) | 120.2      |
| C(28)-C(29)-H(29) | 120.0      |
| C(28)-C(29)-C(30) | 120.0(3)   |
| C(30)-C(29)-H(29) | 120.0      |
| C(25)-C(30)-C(29) | 121.2(3)   |
| C(25)-C(30)-H(30) | 119.4      |
| C(29)-C(30)-H(30) | 119.4      |
| C(32)-C(31)-P(3)  | 118.09(19) |

|                   |            |
|-------------------|------------|
| C(32)-C(31)-C(36) | 118.2(2)   |
| C(36)-C(31)-P(3)  | 123.7(2)   |
| C(31)-C(32)-H(32) | 119.3      |
| C(33)-C(32)-C(31) | 121.4(3)   |
| C(33)-C(32)-H(32) | 119.3      |
| C(32)-C(33)-H(33) | 120.0      |
| C(34)-C(33)-C(32) | 119.9(3)   |
| C(34)-C(33)-H(33) | 120.0      |
| C(33)-C(34)-H(34) | 120.2      |
| C(33)-C(34)-C(35) | 119.6(3)   |
| C(35)-C(34)-H(34) | 120.2      |
| C(34)-C(35)-H(35) | 119.5      |
| C(34)-C(35)-C(36) | 120.9(3)   |
| C(36)-C(35)-H(35) | 119.5      |
| C(31)-C(36)-H(36) | 120.0      |
| C(35)-C(36)-C(31) | 119.9(3)   |
| C(35)-C(36)-H(36) | 120.0      |
| C(38)-C(37)-P(3)  | 119.61(19) |
| C(38)-C(37)-C(42) | 118.5(2)   |
| C(42)-C(37)-P(3)  | 121.8(2)   |
| C(37)-C(38)-H(38) | 119.3      |
| C(37)-C(38)-C(39) | 121.4(3)   |
| C(39)-C(38)-H(38) | 119.3      |
| C(38)-C(39)-H(39) | 120.4      |
| C(40)-C(39)-C(38) | 119.1(3)   |
| C(40)-C(39)-H(39) | 120.4      |
| C(39)-C(40)-H(40) | 120.0      |
| C(41)-C(40)-C(39) | 120.1(3)   |
| C(41)-C(40)-H(40) | 120.0      |
| C(40)-C(41)-H(41) | 119.5      |
| C(40)-C(41)-C(42) | 121.0(3)   |
| C(42)-C(41)-H(41) | 119.5      |
| C(37)-C(42)-H(42) | 120.0      |
| C(41)-C(42)-C(37) | 120.0(3)   |
| C(41)-C(42)-H(42) | 120.0      |
| C(44)-C(43)-P(4)  | 120.33(19) |

|                   |             |
|-------------------|-------------|
| C(44)-C(43)-C(48) | 118.2(2)    |
| C(48)-C(43)-P(4)  | 121.4(2)    |
| C(43)-C(44)-H(44) | 119.6       |
| C(43)-C(44)-C(45) | 120.9(3)    |
| C(45)-C(44)-H(44) | 119.6       |
| C(44)-C(45)-H(45) | 119.8       |
| C(46)-C(45)-C(44) | 120.4(3)    |
| C(46)-C(45)-H(45) | 119.8       |
| C(45)-C(46)-H(46) | 120.1       |
| C(45)-C(46)-C(47) | 119.8(3)    |
| C(47)-C(46)-H(46) | 120.1       |
| C(46)-C(47)-H(47) | 119.9       |
| C(46)-C(47)-C(48) | 120.1(3)    |
| C(48)-C(47)-H(47) | 119.9       |
| C(43)-C(48)-H(48) | 119.7       |
| C(47)-C(48)-C(43) | 120.6(3)    |
| C(47)-C(48)-H(48) | 119.7       |
| C(50)-C(49)-P(4)  | 118.8(2)    |
| C(54)-C(49)-P(4)  | 122.5(2)    |
| C(54)-C(49)-C(50) | 118.7(3)    |
| C(49)-C(50)-H(50) | 119.9       |
| C(51)-C(50)-C(49) | 120.3(3)    |
| C(51)-C(50)-H(50) | 119.9       |
| C(50)-C(51)-H(51) | 119.8       |
| C(50)-C(51)-C(52) | 120.3(3)    |
| C(52)-C(51)-H(51) | 119.8       |
| C(51)-C(52)-H(52) | 120.0       |
| C(53)-C(52)-C(51) | 120.1(3)    |
| C(53)-C(52)-H(52) | 120.0       |
| C(52)-C(53)-H(53) | 120.1       |
| C(52)-C(53)-C(54) | 119.8(3)    |
| C(54)-C(53)-H(53) | 120.1       |
| C(49)-C(54)-C(53) | 120.9(3)    |
| C(49)-C(54)-H(54) | 119.6       |
| C(53)-C(54)-H(54) | 119.6       |
| Br(2)-Zn(1)-Br(1) | 115.382(18) |

|                      |             |
|----------------------|-------------|
| Br(2)-Zn(1)-Br(3)    | 119.899(17) |
| Br(3)-Zn(1)-Br(1)    | 113.066(17) |
| O(1)-Zn(1)-Br(1)     | 98.60(5)    |
| O(1)-Zn(1)-Br(2)     | 102.59(5)   |
| O(1)-Zn(1)-Br(3)     | 103.12(5)   |
| C(55)-O(1)-Zn(1)     | 116.40(17)  |
| C(55)-O(1)-C(58)     | 108.2(2)    |
| C(58)-O(1)-Zn(1)     | 118.98(17)  |
| O(1)-C(55)-H(55A)    | 110.5       |
| O(1)-C(55)-H(55B)    | 110.5       |
| O(1)-C(55)-C(56)     | 106.3(3)    |
| H(55A)-C(55)-H(55B)  | 108.7       |
| C(56)-C(55)-H(55A)   | 110.5       |
| C(56)-C(55)-H(55B)   | 110.5       |
| C(55)-C(56)-H(56A)   | 110.7       |
| C(55)-C(56)-H(56B)   | 110.7       |
| C(55)-C(56)-H(56C)   | 111.6       |
| C(55)-C(56)-H(56D)   | 111.6       |
| C(55)-C(56)-C(57)    | 105.0(3)    |
| C(55)-C(56)-C(57B)   | 101.1(8)    |
| H(56A)-C(56)-H(56B)  | 108.8       |
| H(56C)-C(56)-H(56D)  | 109.4       |
| C(57)-C(56)-H(56A)   | 110.7       |
| C(57)-C(56)-H(56B)   | 110.7       |
| C(57B)-C(56)-H(56C)  | 111.6       |
| C(57B)-C(56)-H(56D)  | 111.6       |
| C(56)-C(57)-H(57A)   | 111.2       |
| C(56)-C(57)-H(57B)   | 111.2       |
| H(57A)-C(57)-H(57B)  | 109.1       |
| C(58)-C(57)-C(56)    | 102.8(3)    |
| C(58)-C(57)-H(57A)   | 111.2       |
| C(58)-C(57)-H(57B)   | 111.2       |
| C(56)-C(57B)-H(57C)  | 112.0       |
| C(56)-C(57B)-H(57D)  | 112.0       |
| H(57C)-C(57B)-H(57D) | 109.7       |
| C(58)-C(57B)-C(56)   | 98.7(15)    |

|                     |           |
|---------------------|-----------|
| C(58)-C(57B)-H(57C) | 112.0     |
| C(58)-C(57B)-H(57D) | 112.0     |
| O(1)-C(58)-C(57)    | 103.0(3)  |
| O(1)-C(58)-H(58A)   | 111.2     |
| O(1)-C(58)-H(58B)   | 111.2     |
| O(1)-C(58)-H(58C)   | 109.1     |
| O(1)-C(58)-H(58D)   | 109.1     |
| C(57)-C(58)-H(58A)  | 111.2     |
| C(57)-C(58)-H(58B)  | 111.2     |
| C(57B)-C(58)-O(1)   | 112.7(12) |
| C(57B)-C(58)-H(58C) | 109.1     |
| C(57B)-C(58)-H(58D) | 109.1     |
| H(58A)-C(58)-H(58B) | 109.1     |
| H(58C)-C(58)-H(58D) | 107.8     |

---

Table S14. Anisotropic displacement parameters ( $\text{\AA}^2 \times 10^3$ ) for RBabu2903. The anisotropic displacement factor exponent takes the form:  $-2\pi^2 [ h^2 a^{*2} U^{11} + \dots + 2 h k a^* b^* U^{12} ]$

|       | U <sup>11</sup> | U <sup>22</sup> | U <sup>33</sup> | U <sup>23</sup> | U <sup>13</sup> | U <sup>12</sup> |
|-------|-----------------|-----------------|-----------------|-----------------|-----------------|-----------------|
| Co(1) | 16(1)           | 17(1)           | 16(1)           | 1(1)            | 1(1)            | 0(1)            |
| P(1)  | 20(1)           | 17(1)           | 18(1)           | 1(1)            | 2(1)            | -1(1)           |
| P(2)  | 19(1)           | 23(1)           | 21(1)           | 2(1)            | -1(1)           | -1(1)           |
| P(3)  | 18(1)           | 19(1)           | 18(1)           | 1(1)            | 2(1)            | 3(1)            |
| P(4)  | 21(1)           | 20(1)           | 17(1)           | 2(1)            | 4(1)            | 2(1)            |
| C(1)  | 24(1)           | 18(1)           | 25(1)           | 3(1)            | 3(1)            | 0(1)            |
| C(2)  | 22(1)           | 25(1)           | 32(1)           | 9(1)            | -4(1)           | 1(1)            |
| C(3)  | 19(1)           | 26(1)           | 33(1)           | 7(1)            | -2(1)           | 2(1)            |
| C(4)  | 19(1)           | 27(1)           | 21(1)           | 2(1)            | 0(1)            | 1(1)            |
| C(5)  | 24(1)           | 28(1)           | 18(1)           | 2(1)            | -1(1)           | 2(1)            |
| C(6)  | 24(1)           | 23(1)           | 20(1)           | -2(1)           | 3(1)            | -1(1)           |
| C(7)  | 23(1)           | 17(1)           | 17(1)           | 3(1)            | 4(1)            | -1(1)           |
| C(8)  | 23(1)           | 23(1)           | 24(1)           | 1(1)            | 4(1)            | -1(1)           |
| C(9)  | 24(1)           | 36(2)           | 31(1)           | 4(1)            | -1(1)           | -2(1)           |
| C(10) | 32(2)           | 33(2)           | 27(1)           | -3(1)           | 0(1)            | -10(1)          |
| C(11) | 40(2)           | 26(1)           | 26(1)           | -6(1)           | 9(1)            | -7(1)           |
| C(12) | 26(1)           | 25(1)           | 25(1)           | 0(1)            | 6(1)            | -1(1)           |
| C(13) | 20(1)           | 22(1)           | 20(1)           | 0(1)            | 2(1)            | -3(1)           |
| C(14) | 39(2)           | 23(1)           | 28(1)           | 1(1)            | 9(1)            | -1(1)           |
| C(15) | 55(2)           | 35(2)           | 31(2)           | -7(1)           | 19(1)           | 2(1)            |
| C(16) | 39(2)           | 43(2)           | 21(1)           | -1(1)           | 11(1)           | -4(1)           |
| C(17) | 44(2)           | 30(2)           | 30(1)           | 8(1)            | 12(1)           | -5(1)           |
| C(18) | 44(2)           | 22(1)           | 26(1)           | -1(1)           | 10(1)           | -3(1)           |
| C(19) | 24(1)           | 32(2)           | 24(1)           | -2(1)           | 0(1)            | -10(1)          |
| C(20) | 32(2)           | 41(2)           | 29(1)           | 7(1)            | -4(1)           | -14(1)          |
| C(21) | 52(2)           | 59(2)           | 24(2)           | 4(1)            | 0(1)            | -25(2)          |
| C(22) | 55(2)           | 70(2)           | 28(2)           | -13(2)          | 16(2)           | -27(2)          |
| C(23) | 43(2)           | 59(2)           | 42(2)           | -15(2)          | 15(2)           | -9(2)           |
| C(24) | 31(2)           | 43(2)           | 30(1)           | -4(1)           | 4(1)            | -4(1)           |

|       |       |       |       |       |        |        |
|-------|-------|-------|-------|-------|--------|--------|
| C(25) | 22(1) | 28(1) | 27(1) | 4(1)  | -3(1)  | -6(1)  |
| C(26) | 28(2) | 30(2) | 60(2) | 8(1)  | 13(1)  | 0(1)   |
| C(27) | 25(2) | 45(2) | 78(2) | 17(2) | 14(2)  | -2(1)  |
| C(28) | 35(2) | 35(2) | 54(2) | 11(1) | 3(1)   | -13(1) |
| C(29) | 46(2) | 25(2) | 42(2) | -1(1) | -2(1)  | -9(1)  |
| C(30) | 35(2) | 30(2) | 29(1) | -3(1) | 2(1)   | -6(1)  |
| C(31) | 22(1) | 21(1) | 24(1) | 5(1)  | 6(1)   | 7(1)   |
| C(32) | 30(2) | 28(1) | 28(1) | 2(1)  | 7(1)   | 4(1)   |
| C(33) | 47(2) | 34(2) | 30(2) | -1(1) | 16(1)  | 5(1)   |
| C(34) | 46(2) | 34(2) | 44(2) | 5(1)  | 29(2)  | 9(1)   |
| C(35) | 26(2) | 37(2) | 62(2) | 3(2)  | 20(1)  | 1(1)   |
| C(36) | 27(2) | 29(2) | 38(2) | -1(1) | 9(1)   | 3(1)   |
| C(37) | 28(1) | 20(1) | 18(1) | 2(1)  | 6(1)   | 2(1)   |
| C(38) | 35(2) | 27(1) | 33(2) | 0(1)  | 10(1)  | 0(1)   |
| C(39) | 53(2) | 35(2) | 41(2) | -4(1) | 19(2)  | -16(2) |
| C(40) | 80(3) | 23(2) | 31(2) | 5(1)  | 18(2)  | -2(2)  |
| C(41) | 60(2) | 26(2) | 29(2) | 6(1)  | 6(1)   | 16(1)  |
| C(42) | 36(2) | 26(1) | 24(1) | 3(1)  | 3(1)   | 6(1)   |
| C(43) | 21(1) | 24(1) | 24(1) | 4(1)  | 6(1)   | 4(1)   |
| C(44) | 33(2) | 32(2) | 24(1) | 1(1)  | 5(1)   | -3(1)  |
| C(45) | 40(2) | 34(2) | 43(2) | 4(1)  | 8(1)   | -12(1) |
| C(46) | 37(2) | 40(2) | 39(2) | 17(1) | 11(1)  | -3(1)  |
| C(47) | 44(2) | 50(2) | 24(1) | 8(1)  | 9(1)   | -1(2)  |
| C(48) | 33(2) | 35(2) | 25(1) | 1(1)  | 6(1)   | -5(1)  |
| C(49) | 34(2) | 26(1) | 22(1) | 8(1)  | 13(1)  | 8(1)   |
| C(50) | 34(2) | 39(2) | 49(2) | 11(1) | 13(1)  | 9(1)   |
| C(51) | 38(2) | 58(2) | 72(2) | 24(2) | 23(2)  | 23(2)  |
| C(52) | 66(2) | 44(2) | 60(2) | 21(2) | 32(2)  | 33(2)  |
| C(53) | 74(3) | 26(2) | 39(2) | 9(1)  | 25(2)  | 18(2)  |
| C(54) | 43(2) | 30(2) | 24(1) | 7(1)  | 11(1)  | 12(1)  |
| Br(1) | 37(1) | 29(1) | 64(1) | 1(1)  | 0(1)   | 0(1)   |
| Br(2) | 34(1) | 84(1) | 42(1) | 26(1) | -5(1)  | -22(1) |
| Br(3) | 30(1) | 47(1) | 45(1) | -3(1) | -11(1) | 2(1)   |
| Zn(1) | 22(1) | 33(1) | 29(1) | -1(1) | 0(1)   | -1(1)  |

|        |       |       |       |        |       |       |
|--------|-------|-------|-------|--------|-------|-------|
| O(1)   | 32(1) | 31(1) | 36(1) | -5(1)  | 5(1)  | -2(1) |
| C(55)  | 36(2) | 45(2) | 73(2) | -12(2) | 27(2) | -4(2) |
| C(56)  | 87(3) | 44(2) | 74(3) | 4(2)   | 51(2) | 10(2) |
| C(57)  | 83(3) | 51(3) | 40(2) | -11(2) | 15(2) | 8(2)  |
| C(57B) | 83(3) | 51(3) | 40(2) | -11(2) | 15(2) | 8(2)  |
| C(58)  | 52(2) | 60(2) | 34(2) | -14(2) | -3(2) | 5(2)  |

---



Table S15. Hydrogen coordinates ( $\times 10^4$ ) and isotropic displacement parameters ( $\text{\AA}^2 \times 10^{-3}$ ) for RBabu2903.

|       | x     | y     | z    | U(eq) |
|-------|-------|-------|------|-------|
| H(1A) | 2165  | 8943  | 6004 | 27    |
| H(1B) | 2611  | 9434  | 5551 | 27    |
| H(2A) | 1921  | 8450  | 4865 | 33    |
| H(2B) | 1169  | 9025  | 5076 | 33    |
| H(3A) | 497   | 7803  | 5062 | 32    |
| H(3B) | 843   | 8001  | 5706 | 32    |
| H(4A) | 5818  | 6330  | 7104 | 27    |
| H(4B) | 5608  | 7226  | 6931 | 27    |
| H(5A) | 4332  | 6322  | 7470 | 29    |
| H(5B) | 5156  | 6860  | 7811 | 29    |
| H(6A) | 4350  | 7955  | 7232 | 27    |
| H(6B) | 3894  | 7659  | 7752 | 27    |
| H(8)  | 5499  | 8165  | 6123 | 28    |
| H(9)  | 6675  | 8827  | 6733 | 37    |
| H(10) | 6262  | 9915  | 7230 | 38    |
| H(11) | 4684  | 10361 | 7073 | 36    |
| H(12) | 3509  | 9726  | 6438 | 30    |
| H(14) | 4034  | 7205  | 4971 | 35    |
| H(15) | 4607  | 7316  | 4134 | 47    |
| H(16) | 4828  | 8543  | 3764 | 40    |
| H(17) | 4484  | 9668  | 4234 | 41    |
| H(18) | 3948  | 9561  | 5078 | 36    |
| H(20) | 978   | 7424  | 4276 | 42    |
| H(21) | 1331  | 7038  | 3412 | 55    |
| H(22) | 2463  | 6066  | 3363 | 60    |
| H(23) | 3239  | 5452  | 4171 | 57    |
| H(24) | 2921  | 5855  | 5034 | 42    |
| H(26) | -115  | 6964  | 5819 | 46    |
| H(27) | -1104 | 5993  | 6076 | 59    |
| H(28) | -694  | 4680  | 6037 | 50    |

|        |      |       |      |    |
|--------|------|-------|------|----|
| H(29)  | 661  | 4328  | 5687 | 47 |
| H(30)  | 1645 | 5291  | 5409 | 38 |
| H(32)  | 4621 | 5737  | 5258 | 34 |
| H(33)  | 5662 | 5698  | 4620 | 43 |
| H(34)  | 7157 | 6304  | 4828 | 47 |
| H(35)  | 7609 | 6933  | 5679 | 49 |
| H(36)  | 6582 | 6964  | 6330 | 37 |
| H(38)  | 2960 | 5400  | 6254 | 37 |
| H(39)  | 2681 | 4065  | 6365 | 50 |
| H(40)  | 3982 | 3213  | 6597 | 52 |
| H(41)  | 5531 | 3695  | 6724 | 46 |
| H(42)  | 5816 | 5026  | 6634 | 35 |
| H(44)  | 1718 | 5928  | 6648 | 35 |
| H(45)  | 1004 | 5000  | 7145 | 47 |
| H(46)  | 1193 | 5077  | 8108 | 46 |
| H(47)  | 2126 | 6074  | 8582 | 47 |
| H(48)  | 2837 | 7009  | 8089 | 37 |
| H(50)  | 885  | 7602  | 6763 | 48 |
| H(51)  | -82  | 8688  | 6841 | 65 |
| H(52)  | 606  | 9888  | 7150 | 65 |
| H(53)  | 2254 | 10003 | 7385 | 54 |
| H(54)  | 3232 | 8915  | 7311 | 38 |
| H(55A) | 3494 | 902   | 5404 | 59 |
| H(55B) | 3082 | 1778  | 5290 | 59 |
| H(56A) | 3528 | 827   | 4506 | 77 |
| H(56B) | 2910 | 1621  | 4381 | 77 |
| H(56C) | 3177 | 580   | 4492 | 77 |
| H(56D) | 3334 | 1511  | 4423 | 77 |
| H(57A) | 1783 | 751   | 3987 | 69 |
| H(57B) | 2201 | 59    | 4413 | 69 |
| H(57C) | 1581 | 1777  | 4276 | 69 |
| H(57D) | 1563 | 930   | 3974 | 69 |
| H(58A) | 1087 | 1382  | 4646 | 60 |
| H(58B) | 911  | 474   | 4788 | 60 |
| H(58C) | 1290 | 313   | 4687 | 60 |
| H(58D) | 783  | 1124  | 4794 | 60 |

---
